# Supplementary material
Source: bioRxiv or medRxiv preprint supplement (https://www.biorxiv.org/highwire/filestream/119033/field_highwire_adjunct_files/5/281709-6.pdf)

## SUPPLEMENTARY INFORMATION

### FastQC reports

Short-insert (200 bp) .....2

Short-insert (350 bp) ..... 32

### Mate-pair

2kb ..... 42

5kb ..... 52

12kb ..... 62

### Linked-reads

R1.....72

R2.....82

(Separate FastQC reports for read\_1 and read\_2; first 16 bp of read\_1 are the “droplet” barcodes in linked-read sequencing.)

## Summary

-  [Basic Statistics](#)
-  [Per base sequence quality](#)
-  [Per tile sequence quality](#)
-  [Per sequence quality scores](#)
-  [Per base sequence content](#)
-  [Per sequence GC content](#)
-  [Per base N content](#)
-  [Sequence Length Distribution](#)
-  [Sequence Duplication Levels](#)
-  [Overrepresented sequences](#)
-  [Adapter Content](#)

## Basic Statistics

| Measure                           | Value                   |
|-----------------------------------|-------------------------|
| Filename                          | stdin                   |
| File type                         | Conventional base calls |
| Encoding                          | Sanger / Illumina 1.9   |
| Total Sequences                   | 3214623356              |
| Sequences flagged as poor quality | 0                       |
| Sequence length                   | 100                     |
| %GC                               | 40                      |

## Per base sequence quality

Quality scores across all bases (Sanger / Illumina 1.9 encoding)

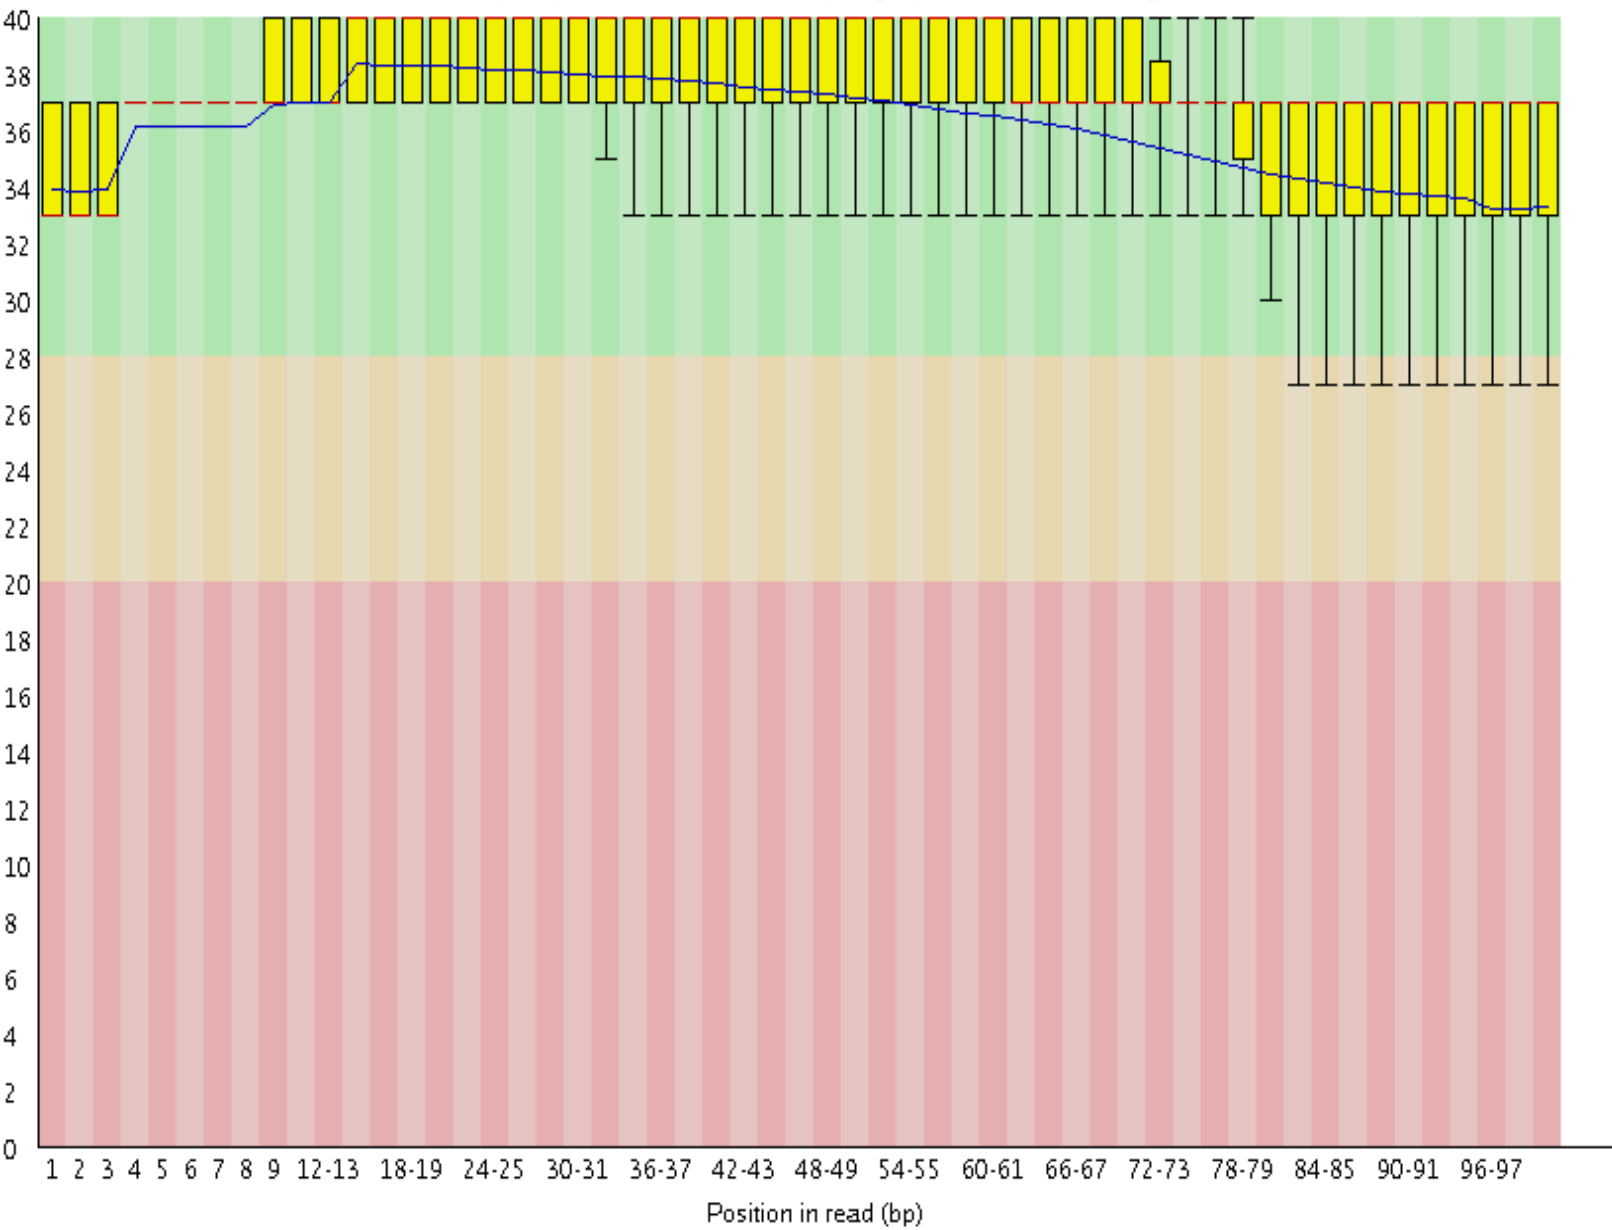

✔ Per tile sequence quality

Quality per tile

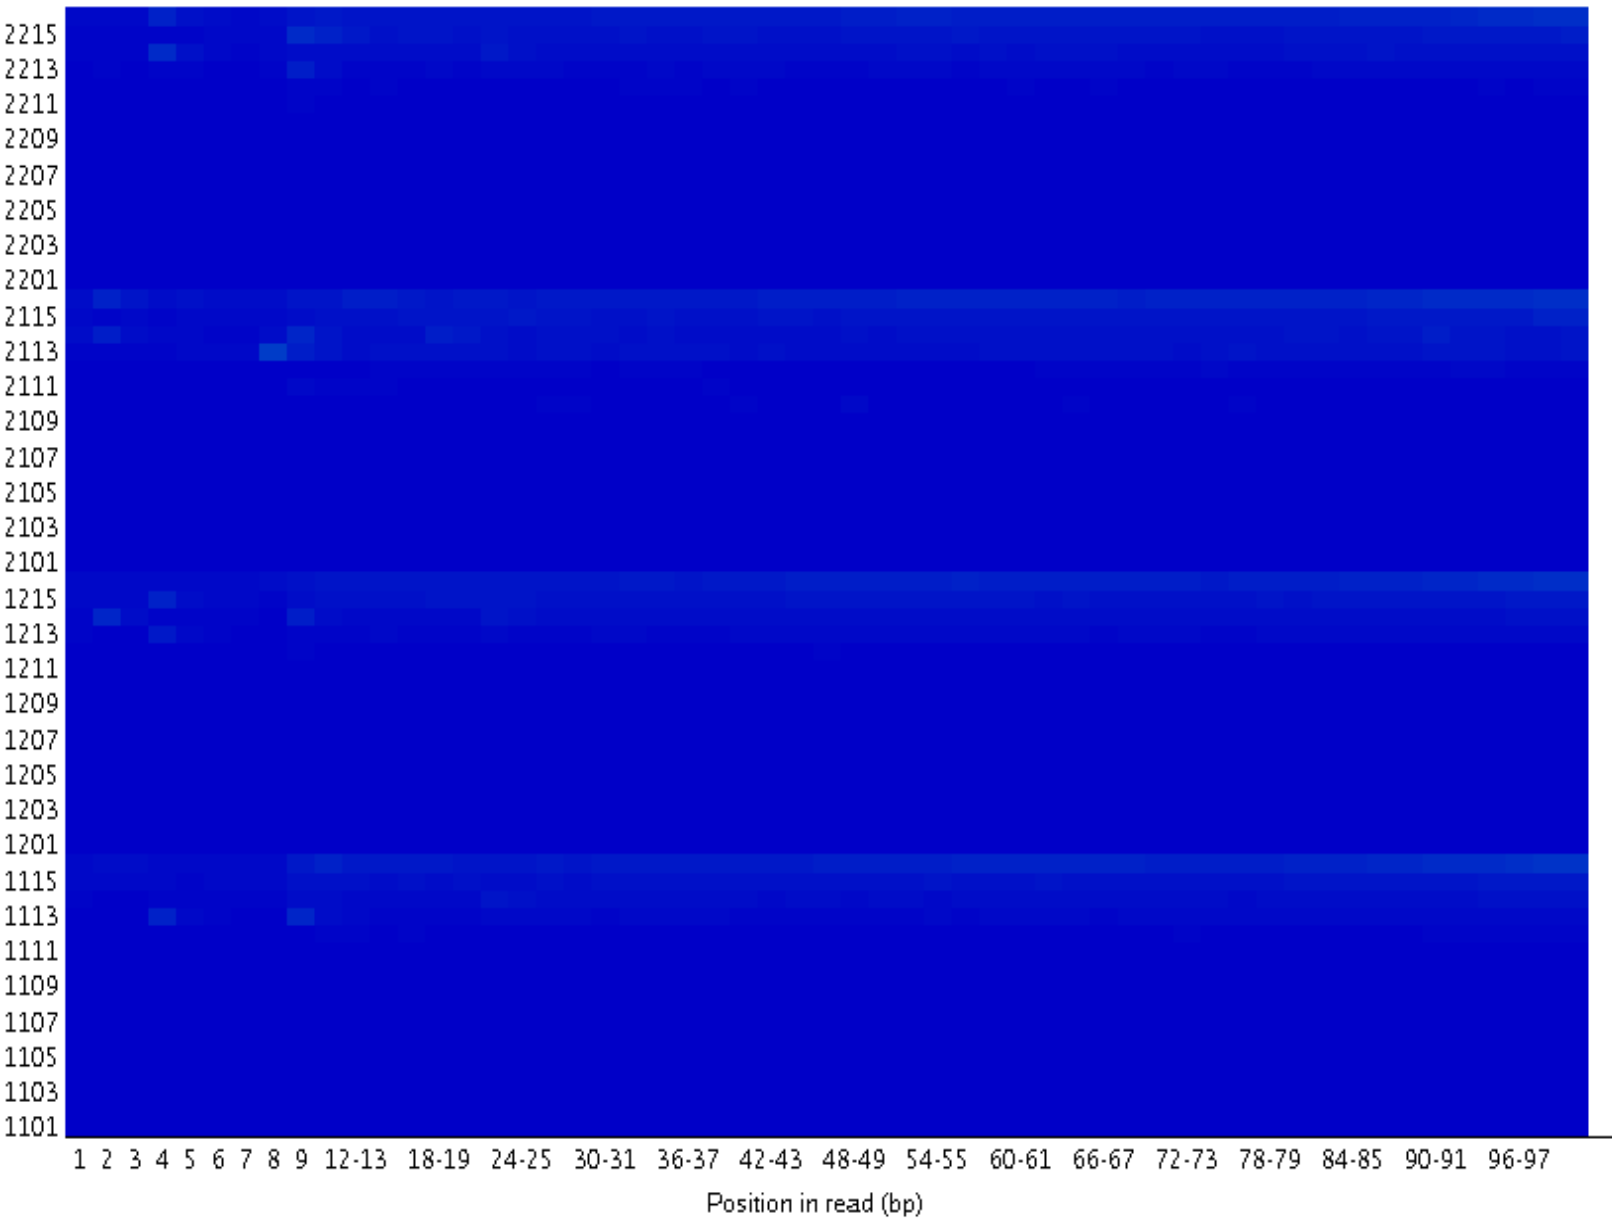

 **Per sequence quality scores**

Quality score distribution over all sequences

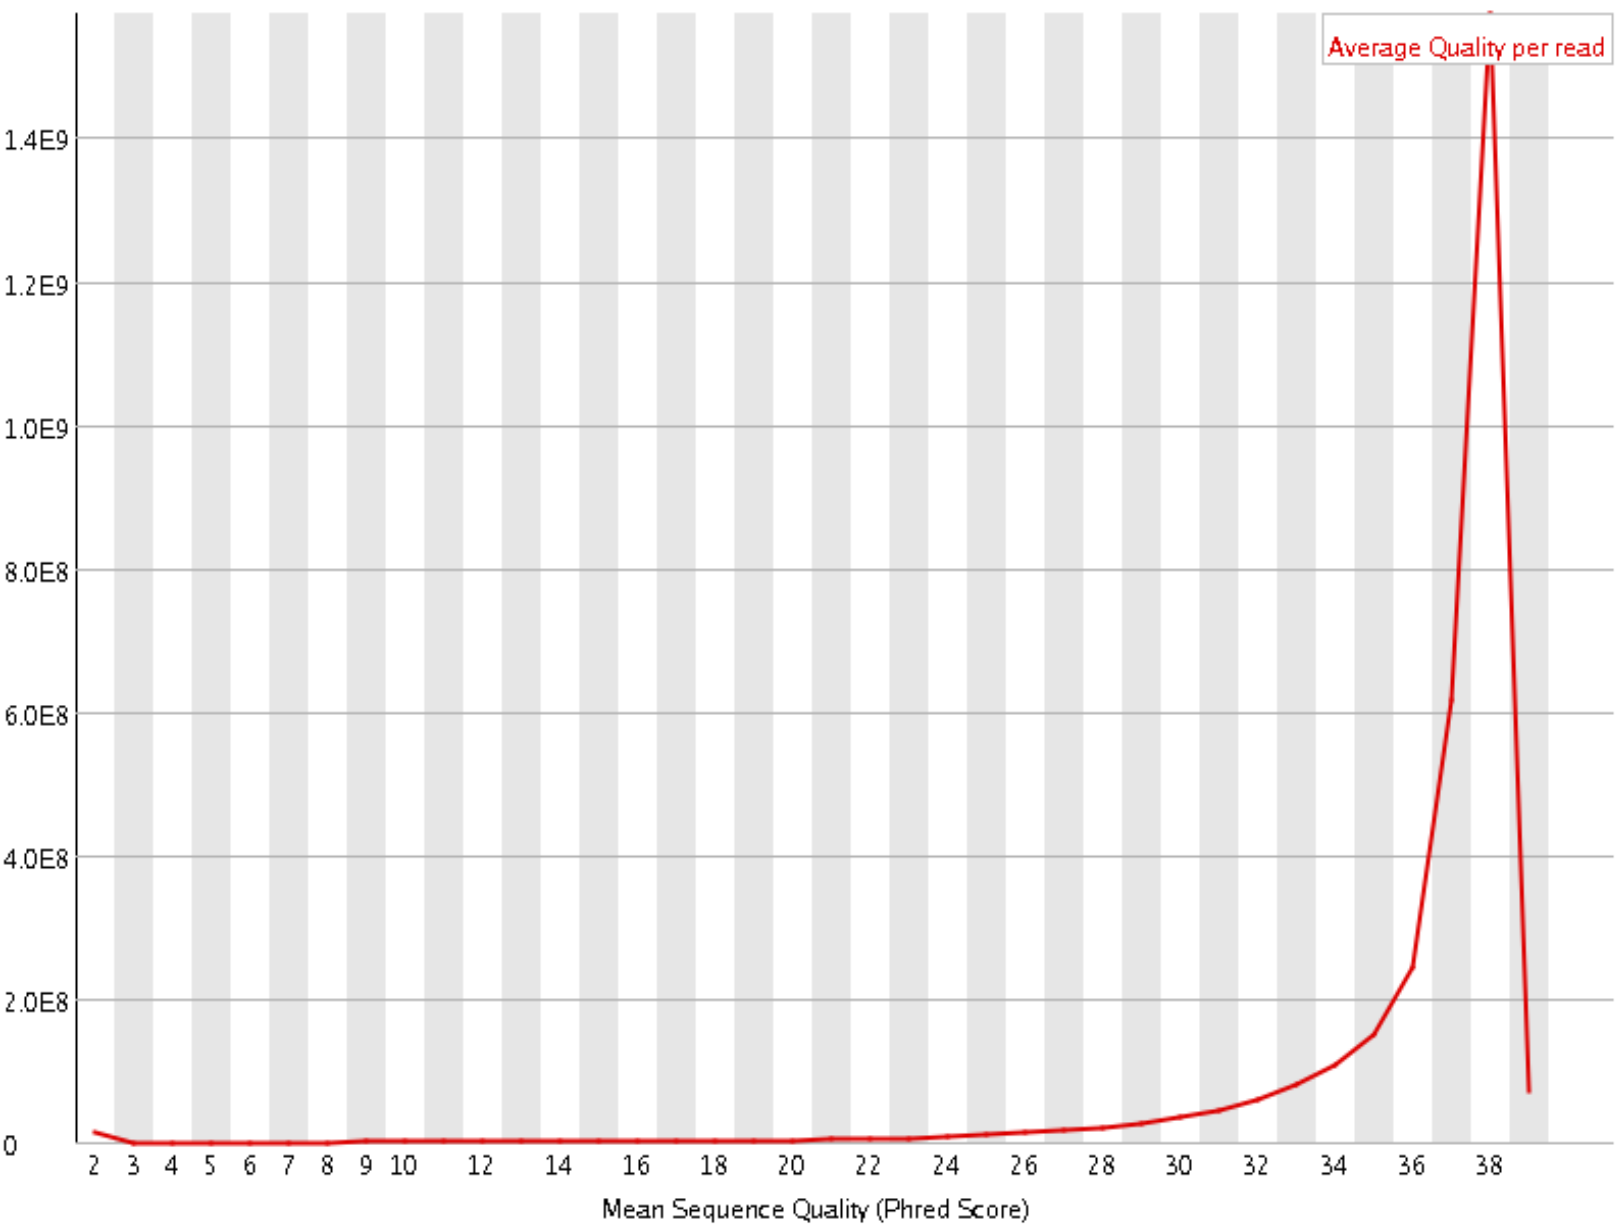

⚠️ **Per base sequence content**

Sequence content across all bases

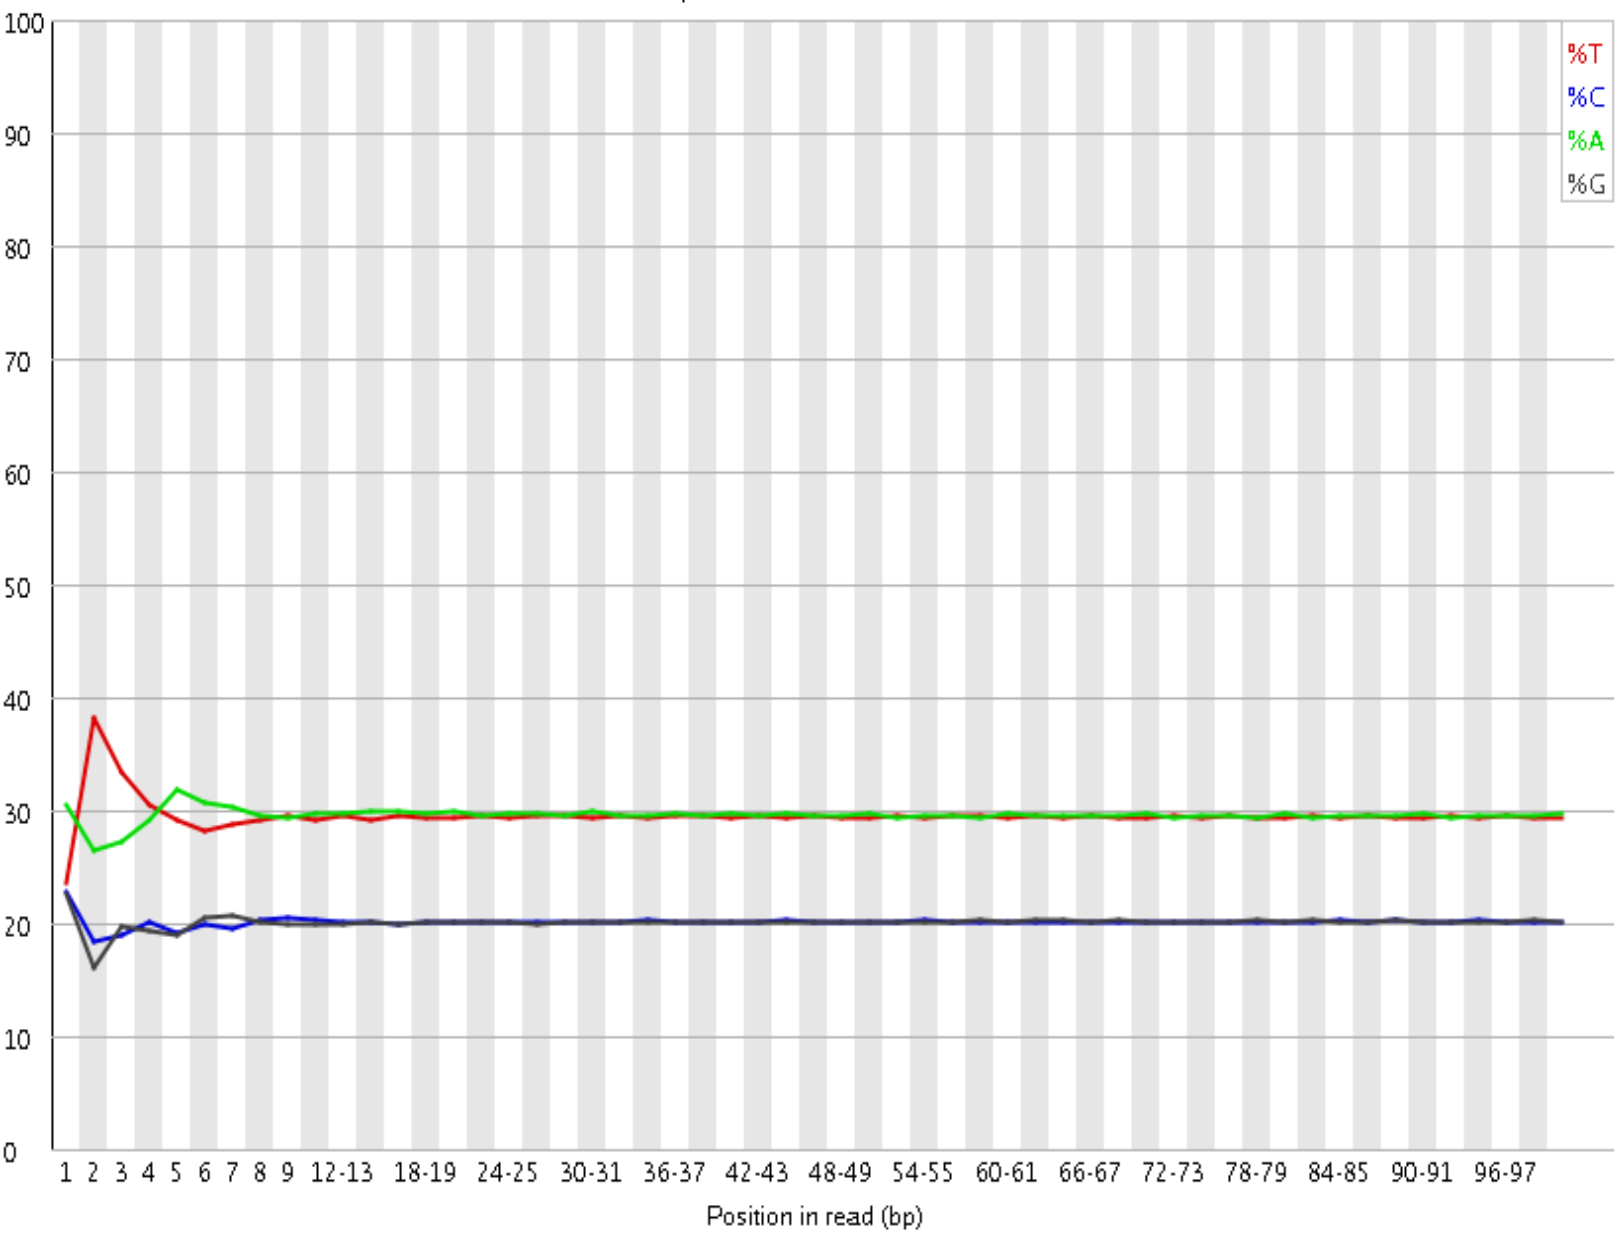

⚠ Per sequence GC content

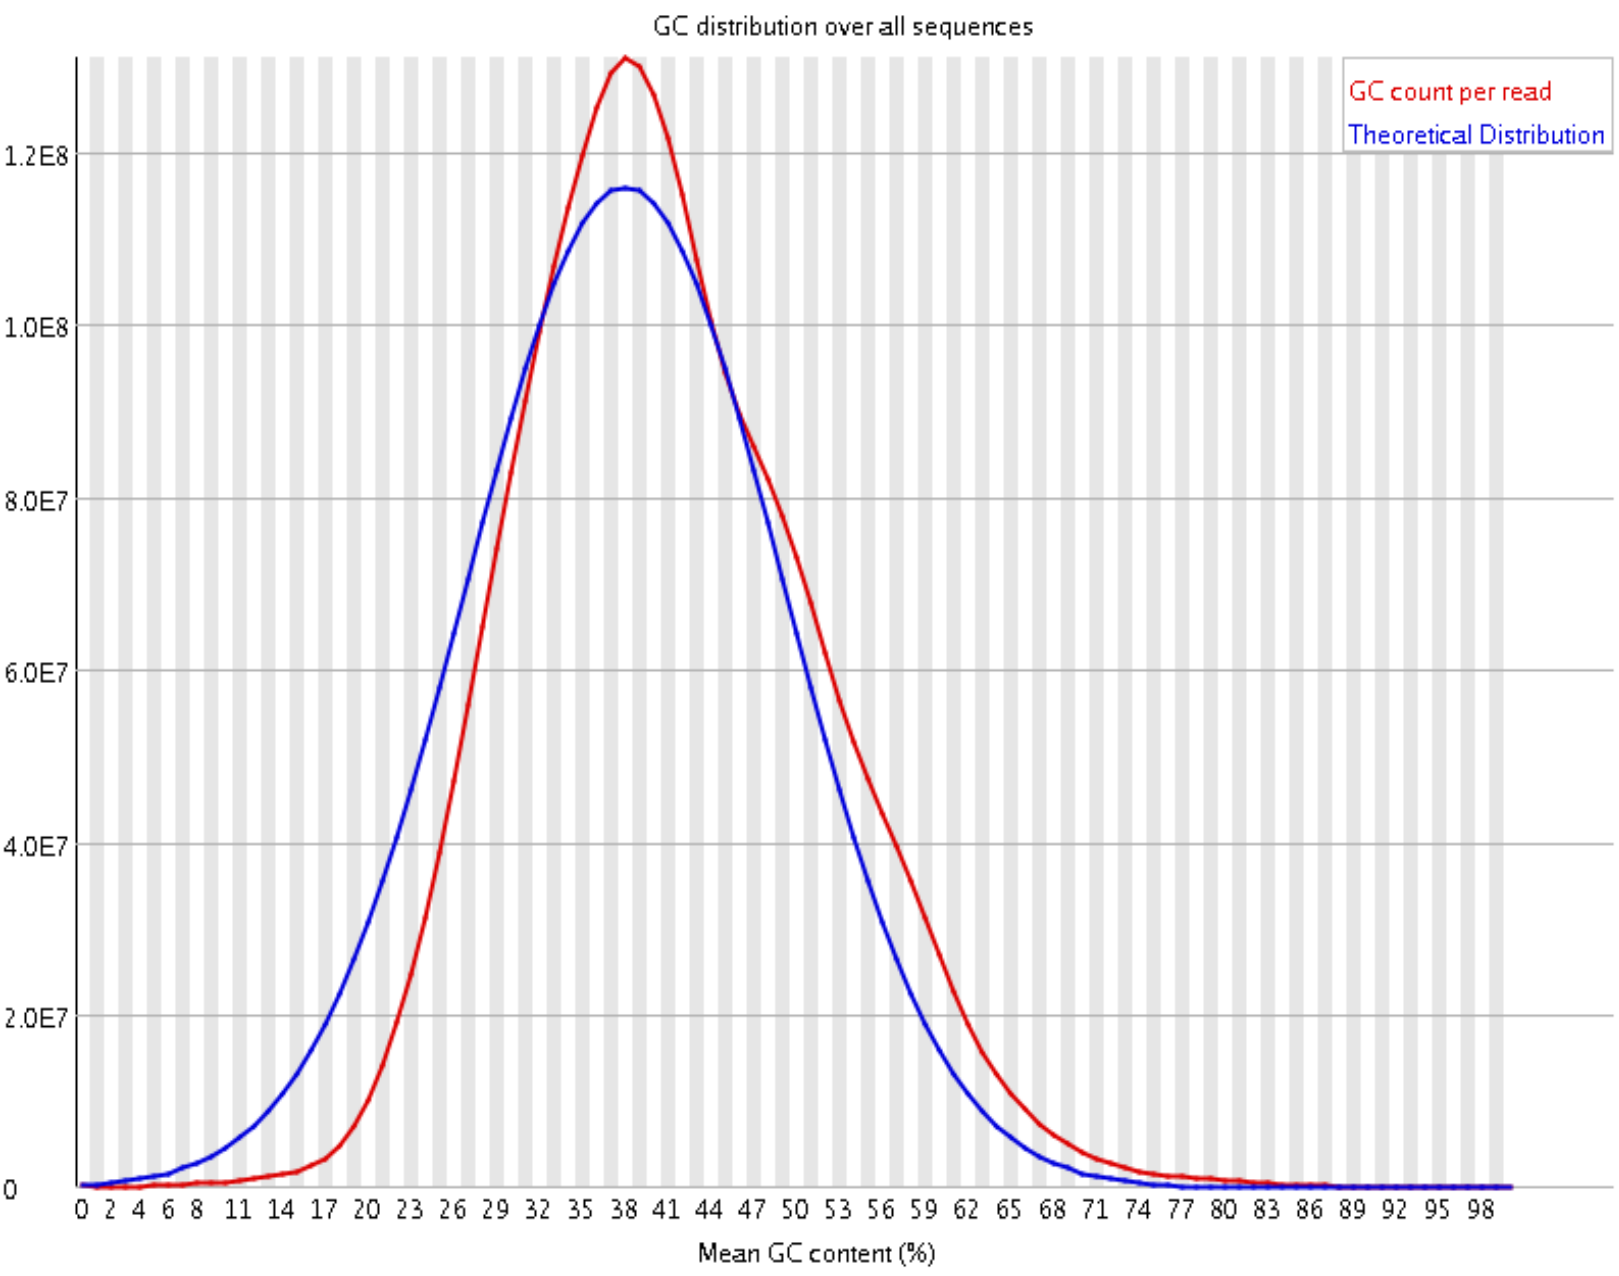

 **Per base N content**

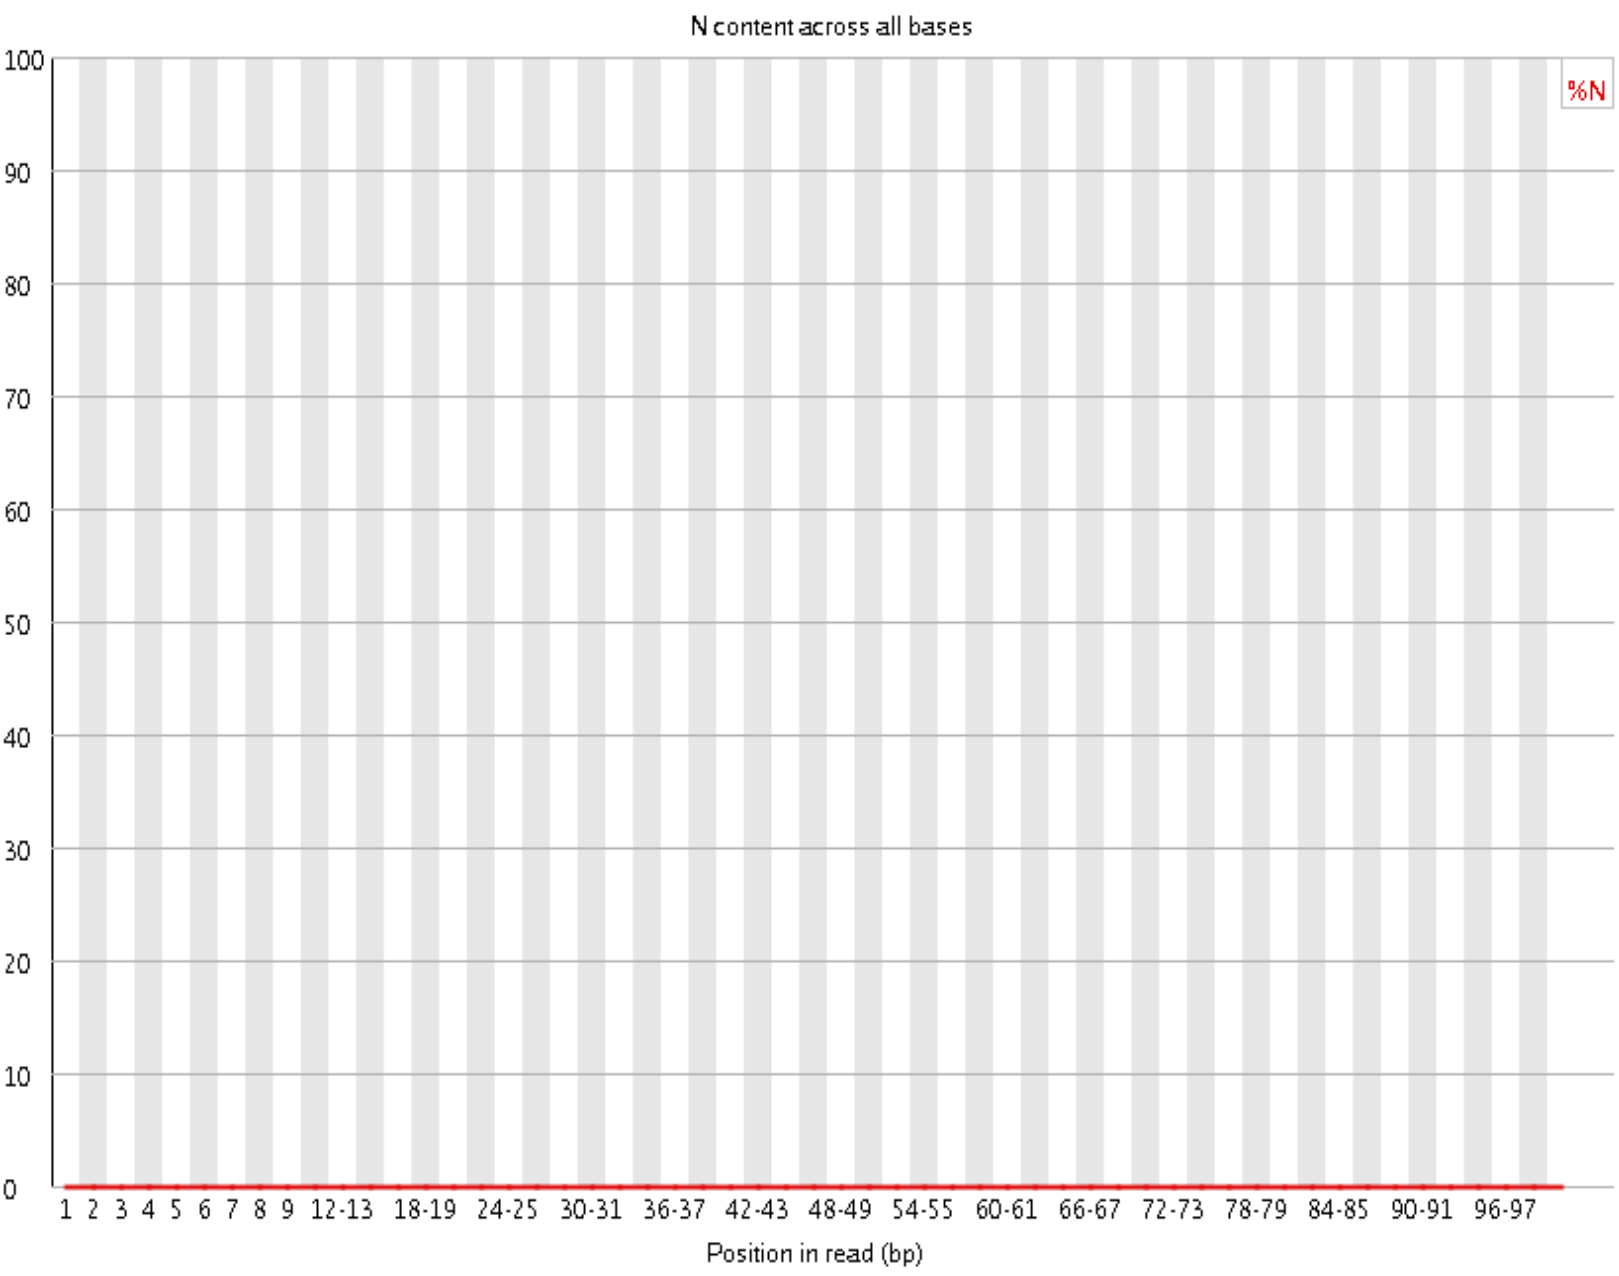

 **Sequence Length Distribution**



Distribution of sequence lengths over all sequences

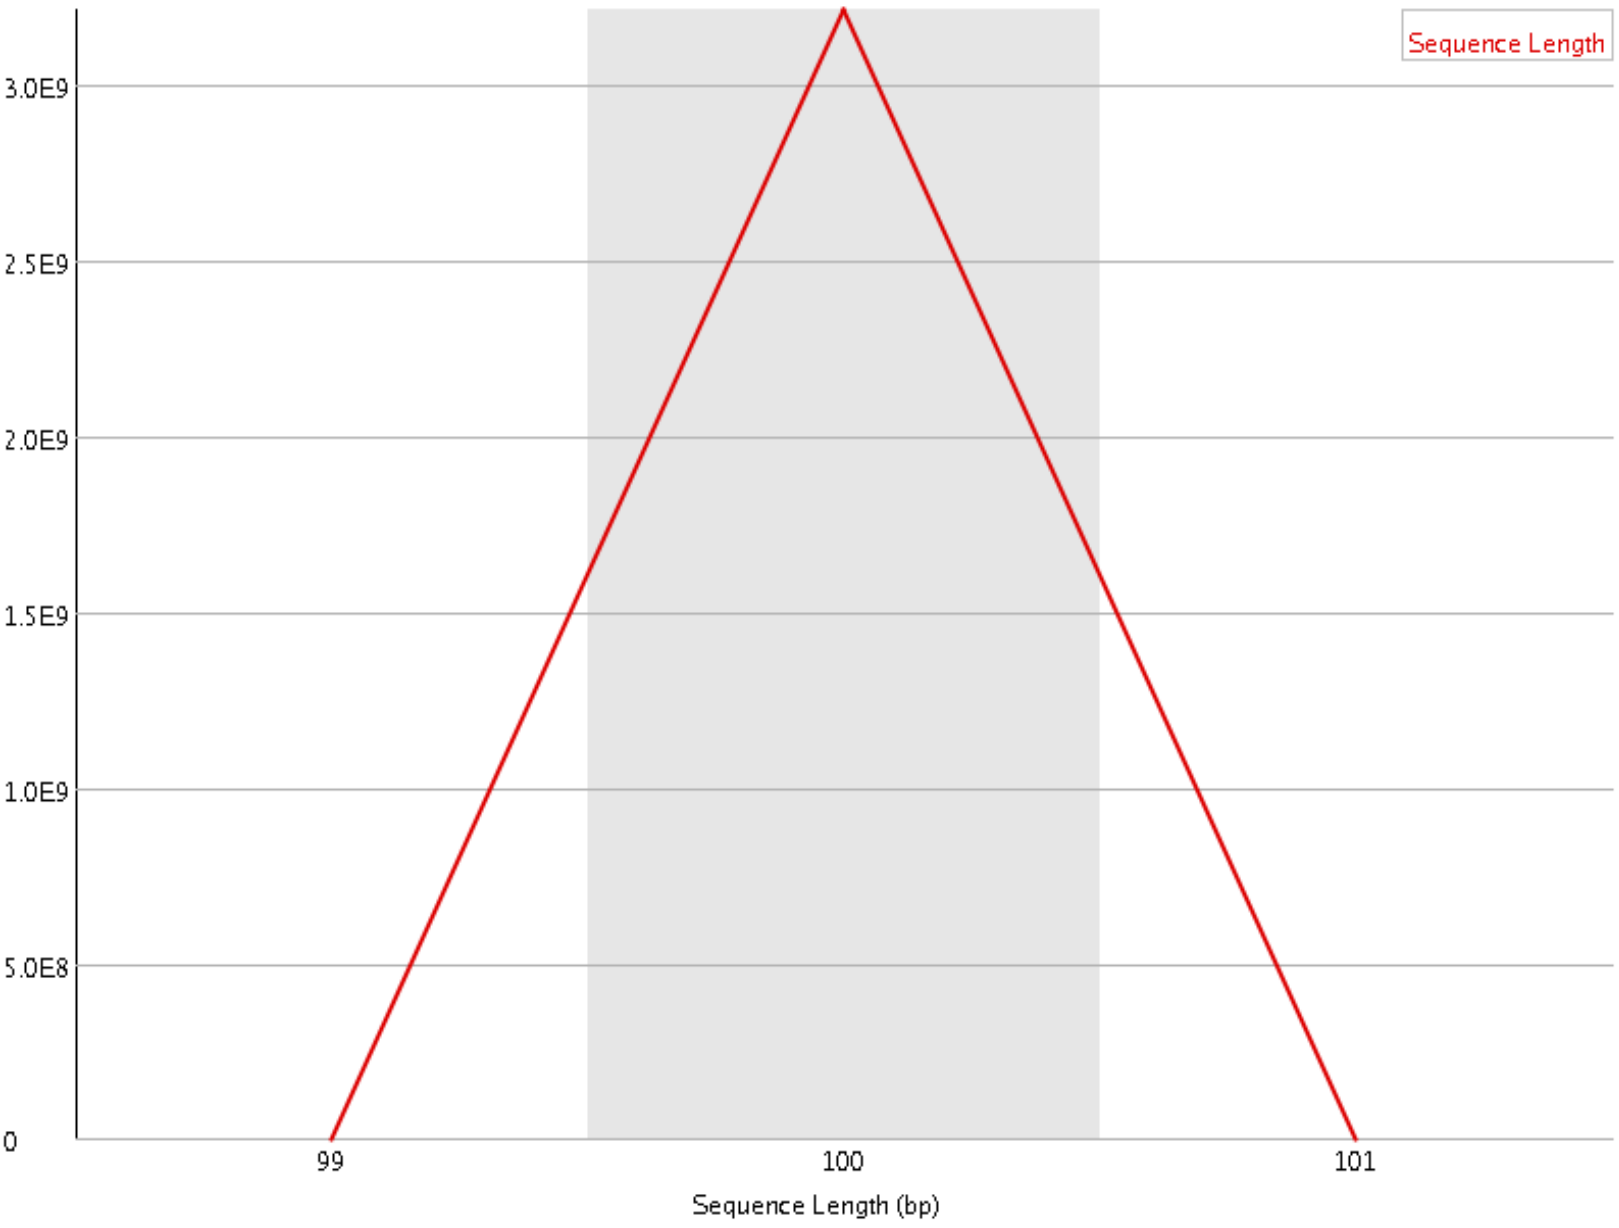

## ! Sequence Duplication Levels

Percent of seqs remaining if deduplicated 67.74%

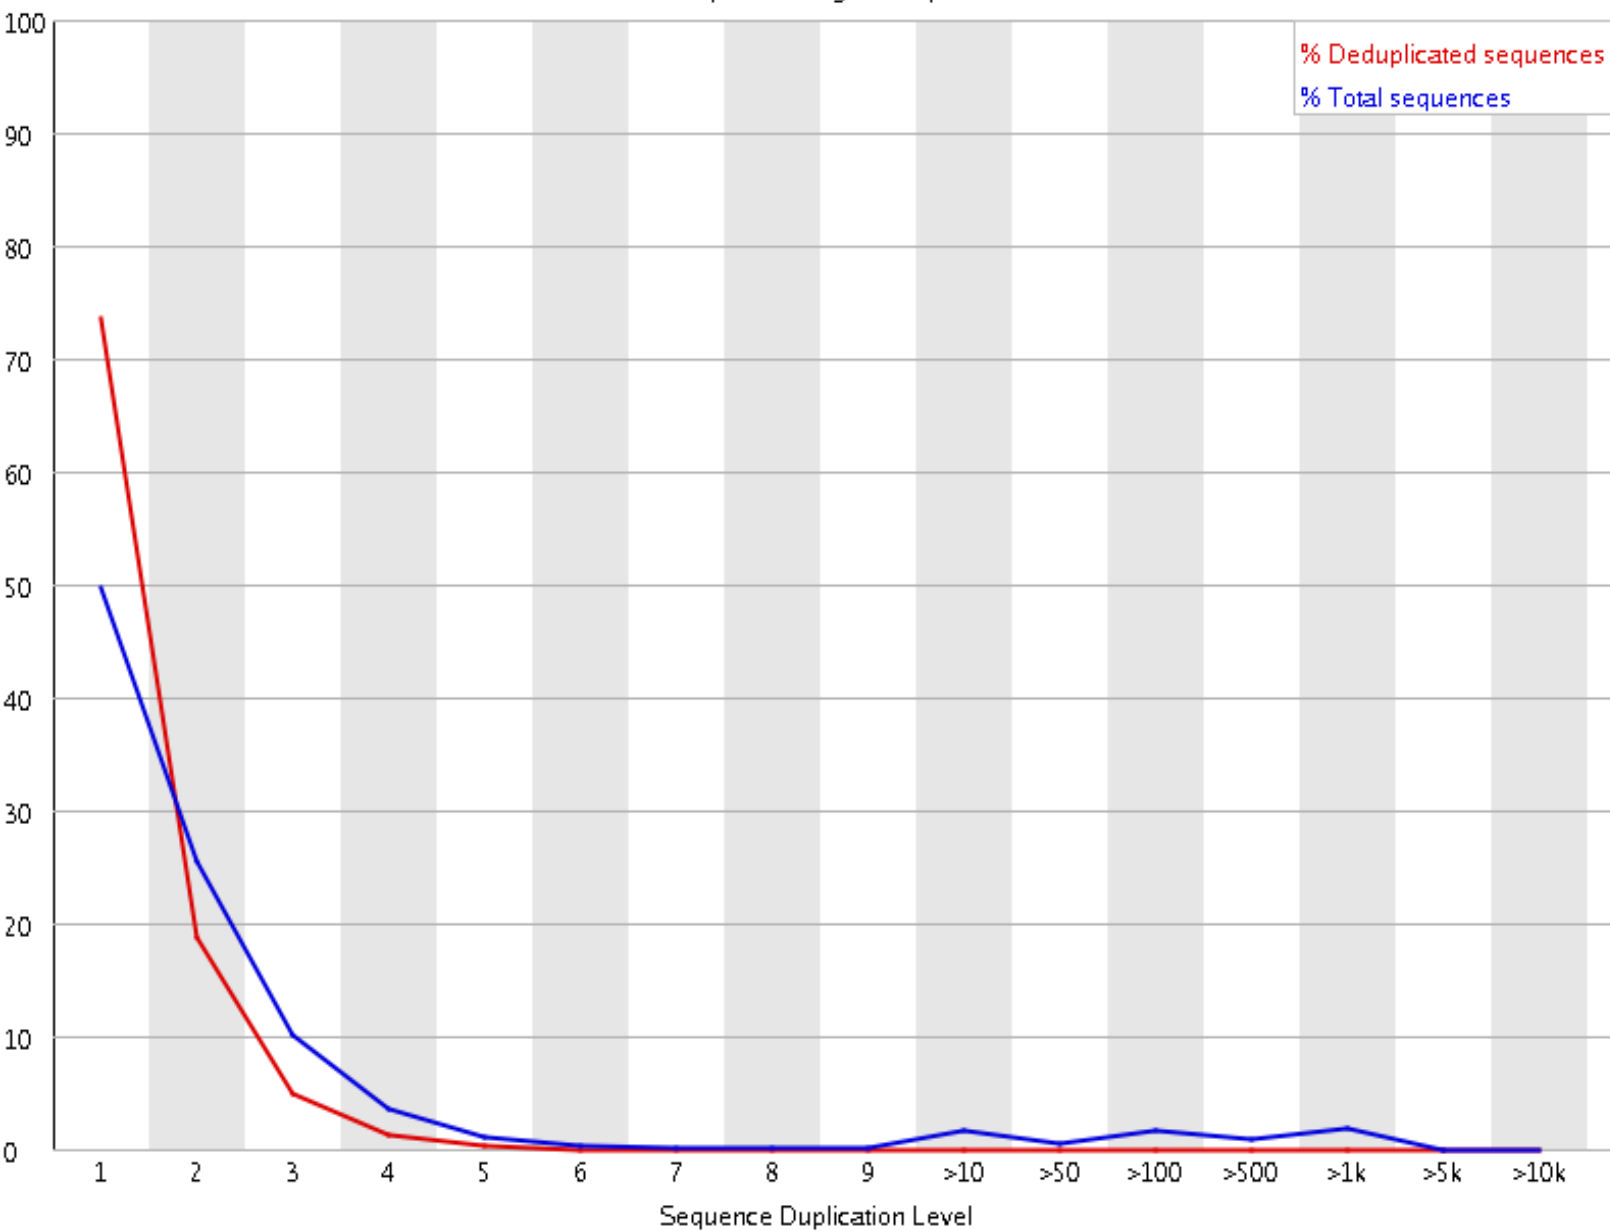

 **Overrepresented sequences**

No overrepresented sequences

 **Adapter Content**

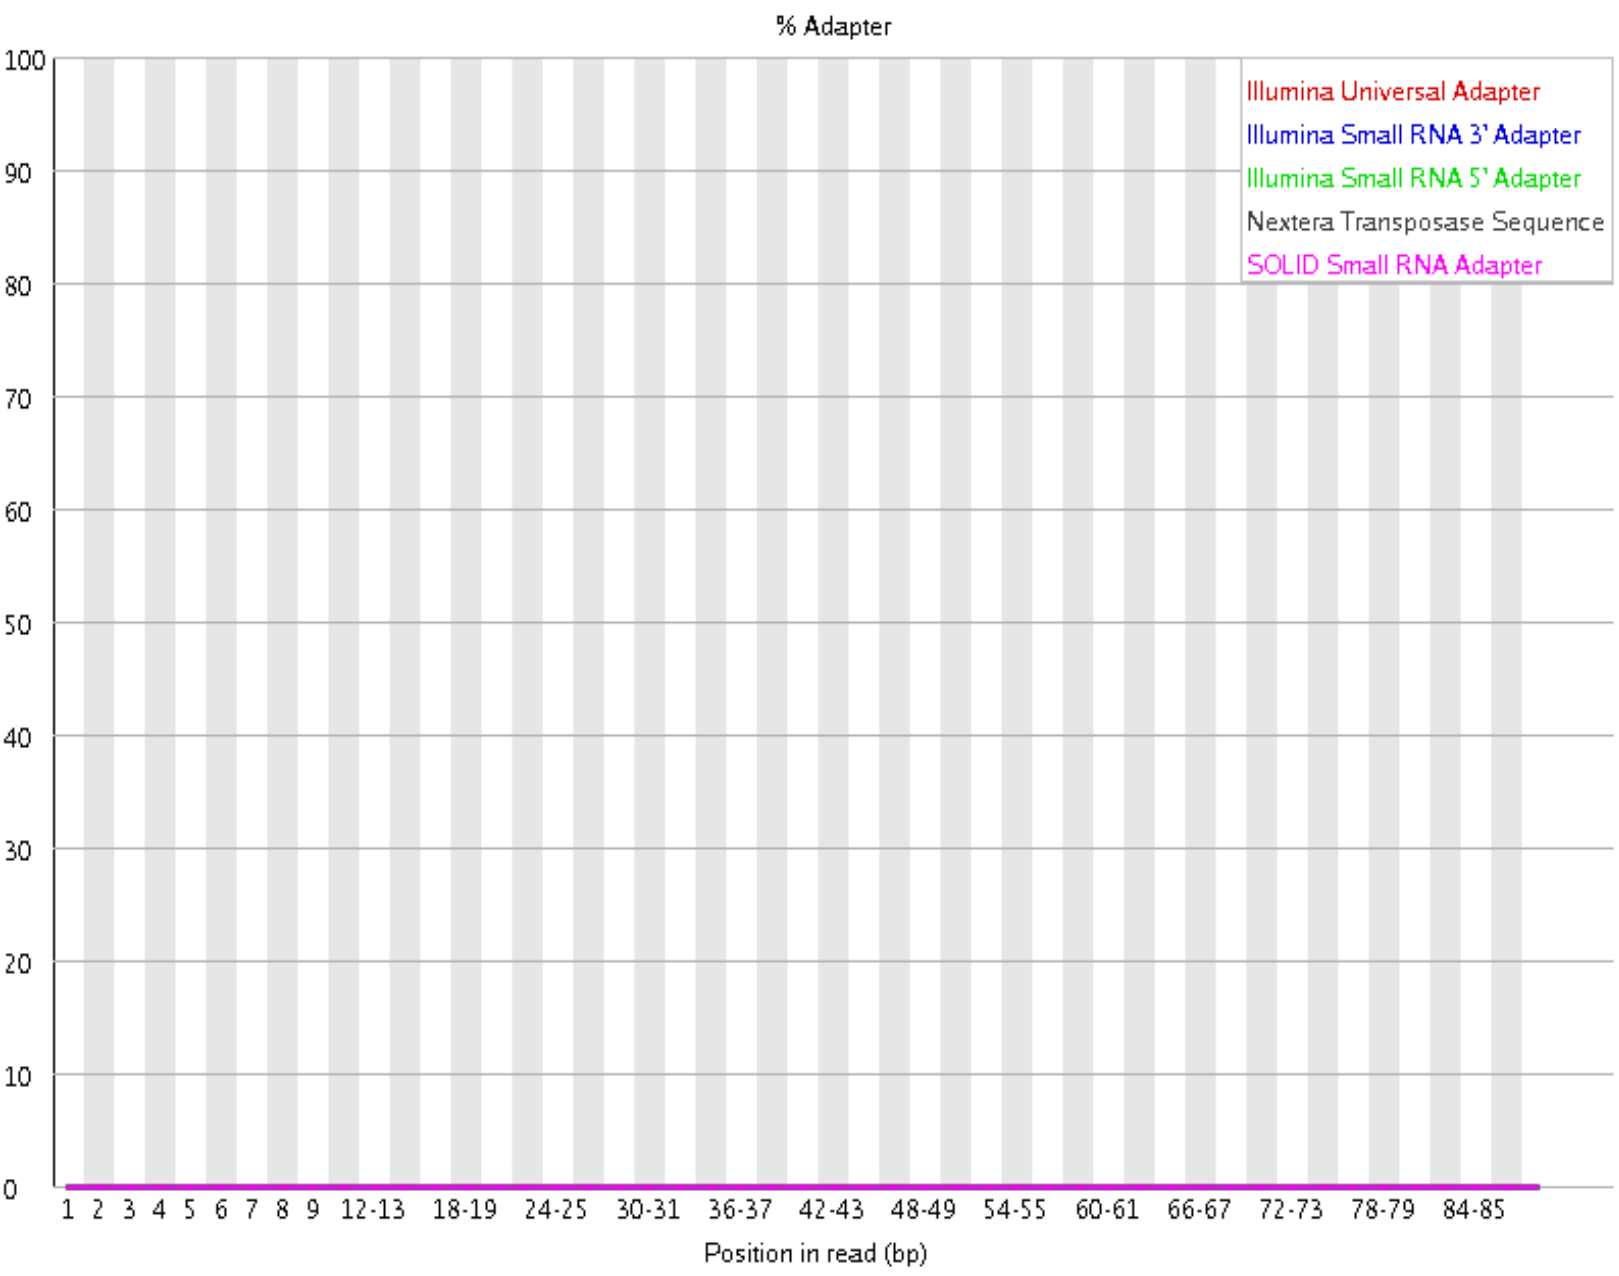

## Summary

- ✓ [Basic Statistics](#)
- ✓ [Per base sequence quality](#)
- ✓ [Per tile sequence quality](#)
- ✓ [Per sequence quality scores](#)
- ✗ [Per base sequence content](#)
- ! [Per sequence GC content](#)
- ✓ [Per base N content](#)
- ✓ [Sequence Length Distribution](#)
- ✓ [Sequence Duplication Levels](#)
- ✓ [Overrepresented sequences](#)
- ✓ [Adapter Content](#)

## ✓ Basic Statistics

| Measure                           | Value                   |
|-----------------------------------|-------------------------|
| Filename                          | stdin                   |
| File type                         | Conventional base calls |
| Encoding                          | Sanger / Illumina 1.9   |
| Total Sequences                   | 1280576580              |
| Sequences flagged as poor quality | 0                       |
| Sequence length                   | 100                     |
| %GC                               | 40                      |

## ✓ Per base sequence quality

Quality scores across all bases (Sanger / Illumina 1.9 encoding)

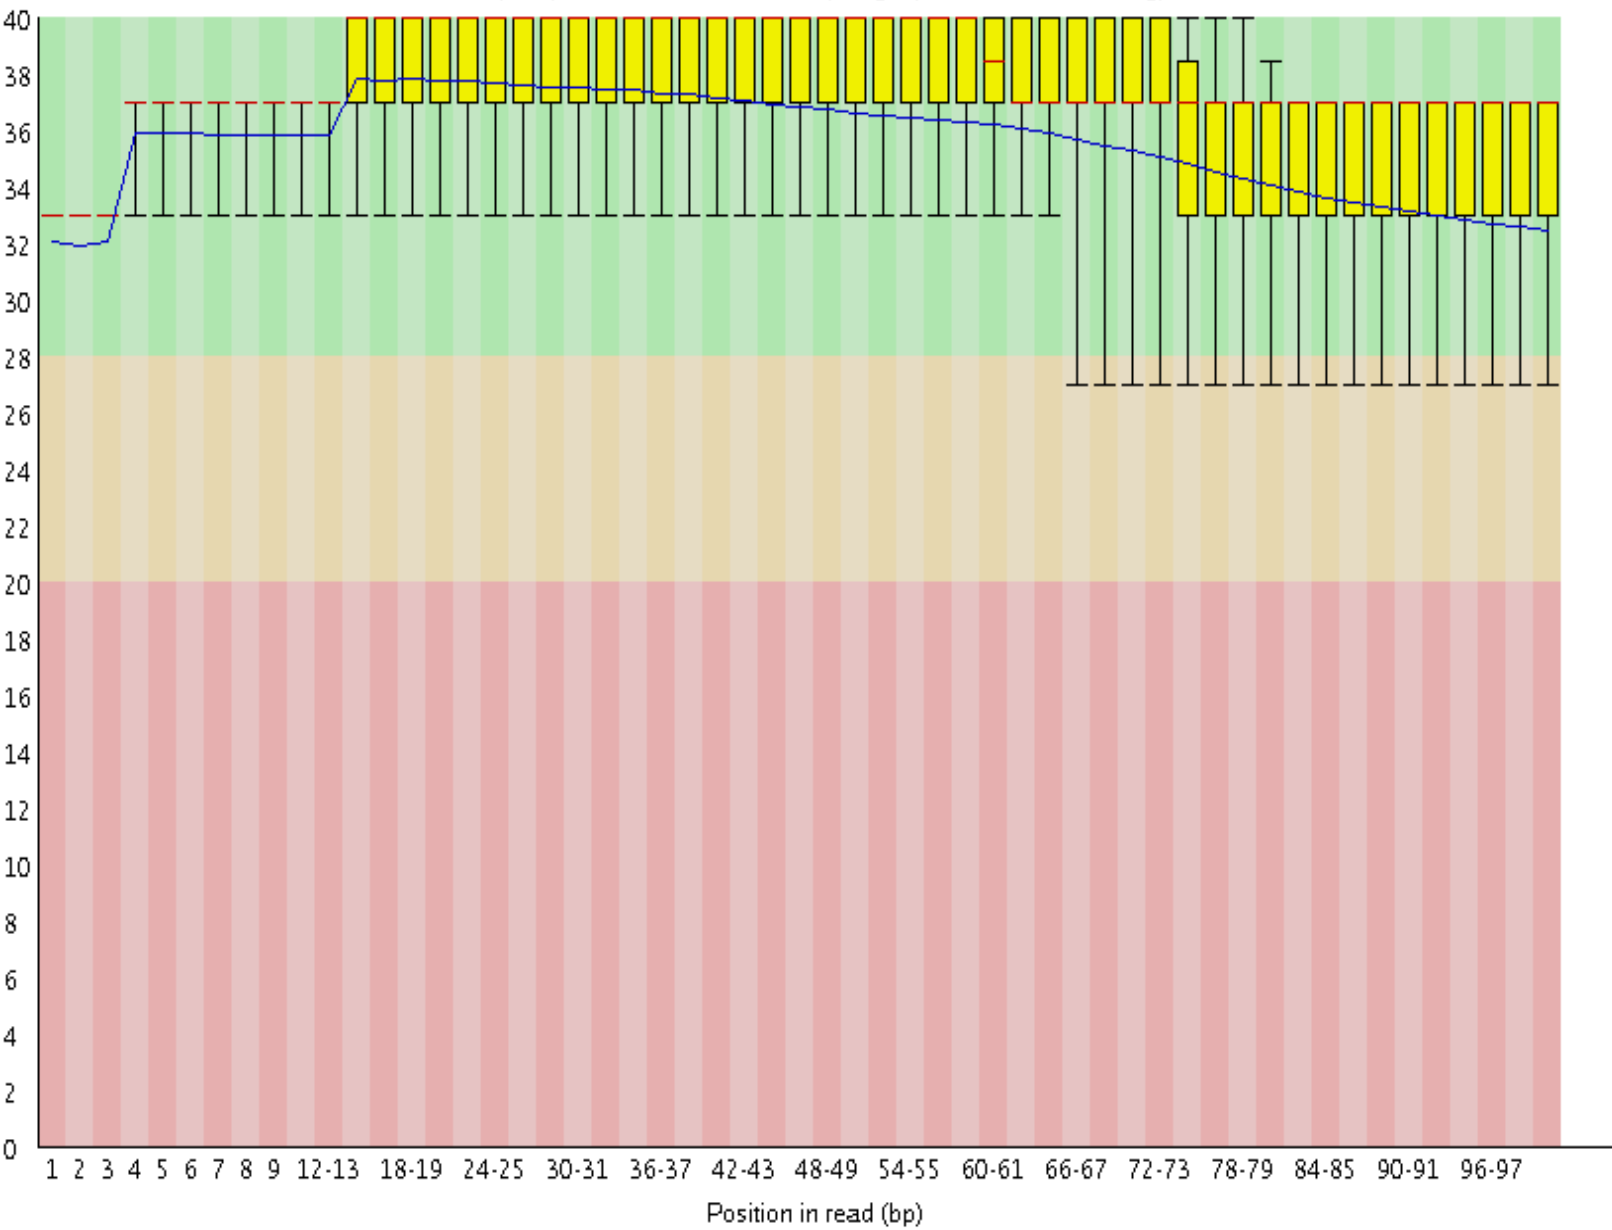

✔ Per tile sequence quality

Quality per tile

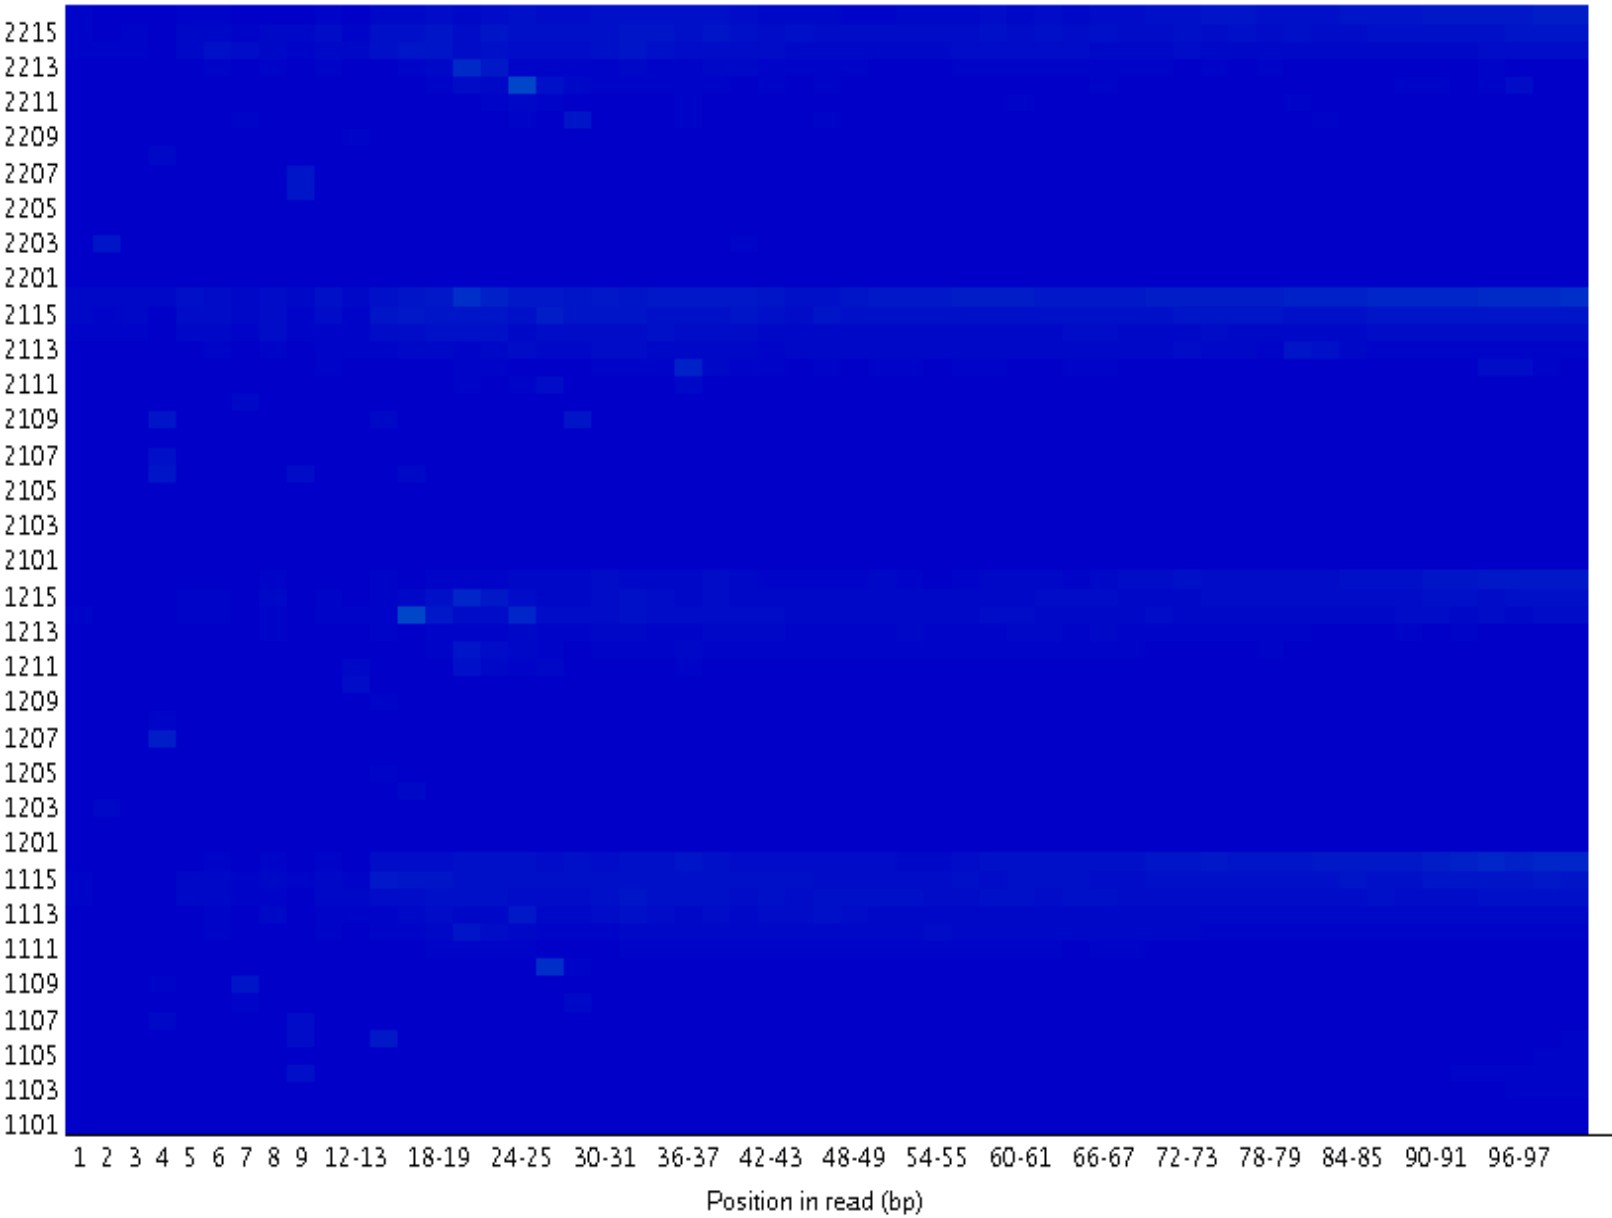

 **Per sequence quality scores**

Quality score distribution over all sequences

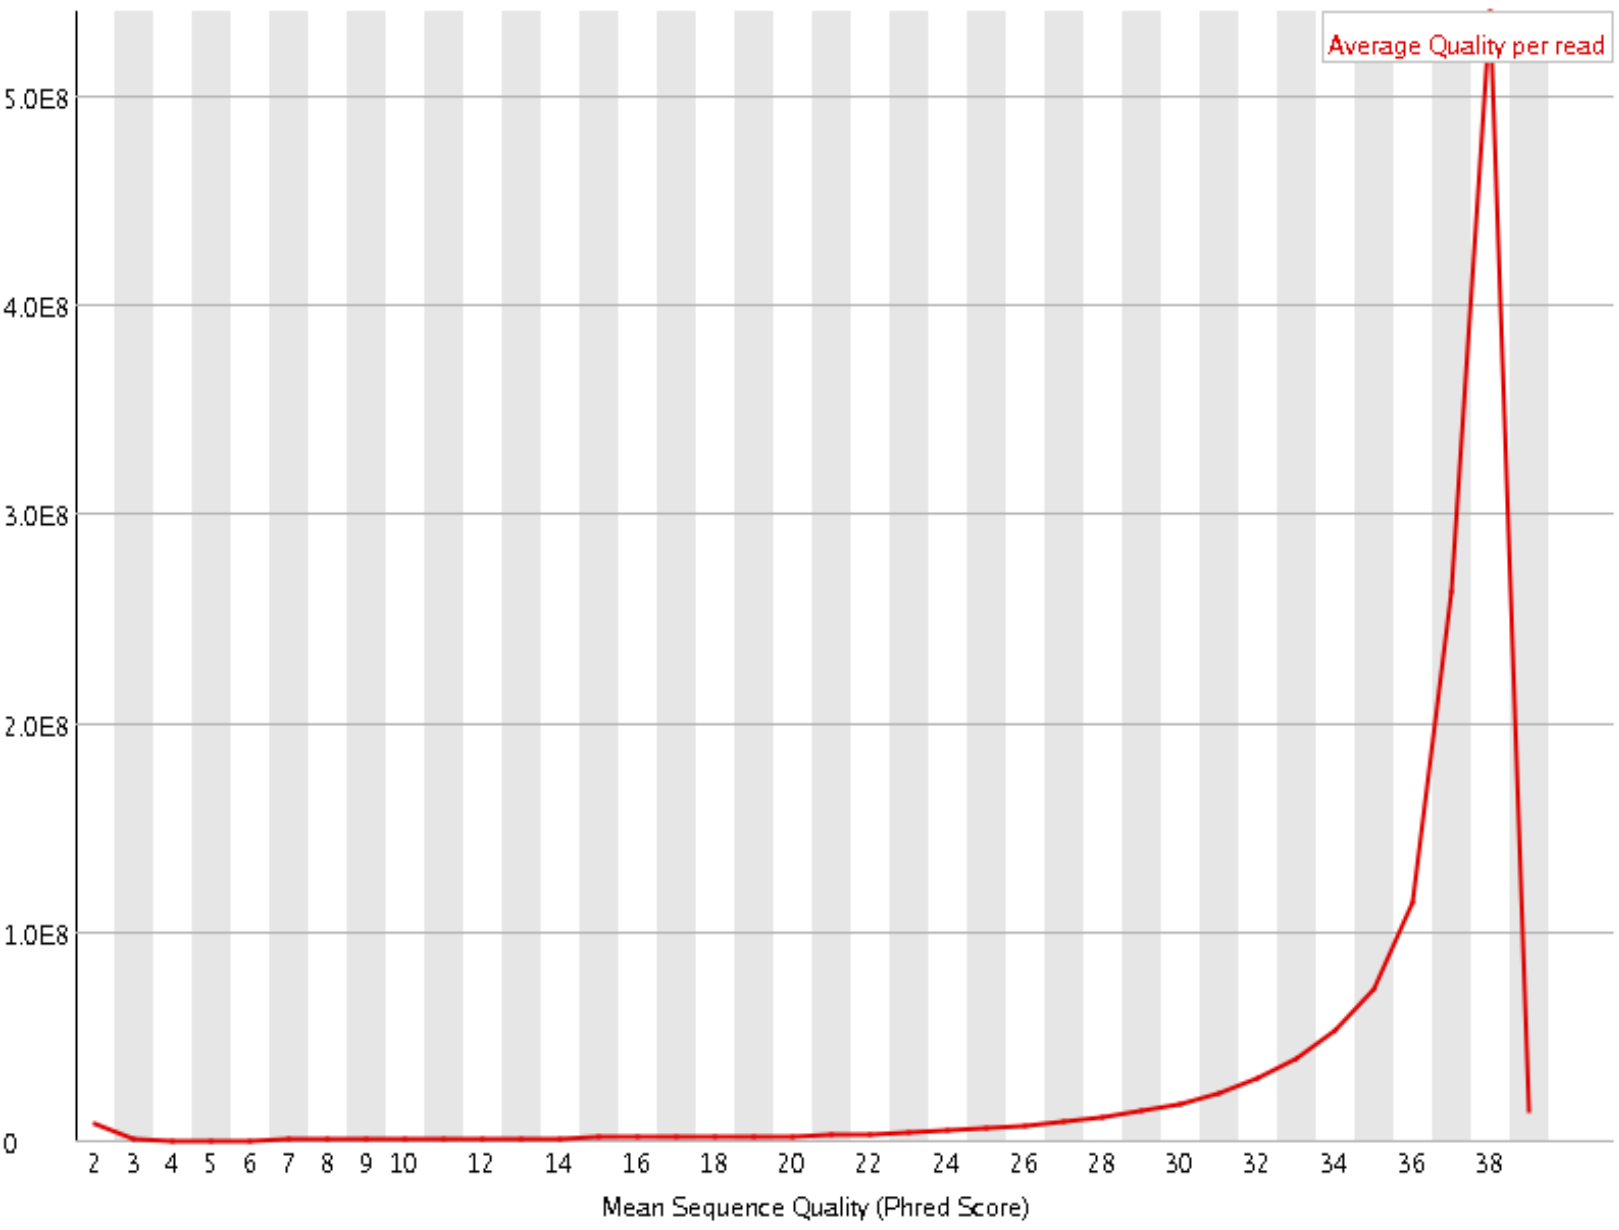

❌ Per base sequence content

Sequence content across all bases

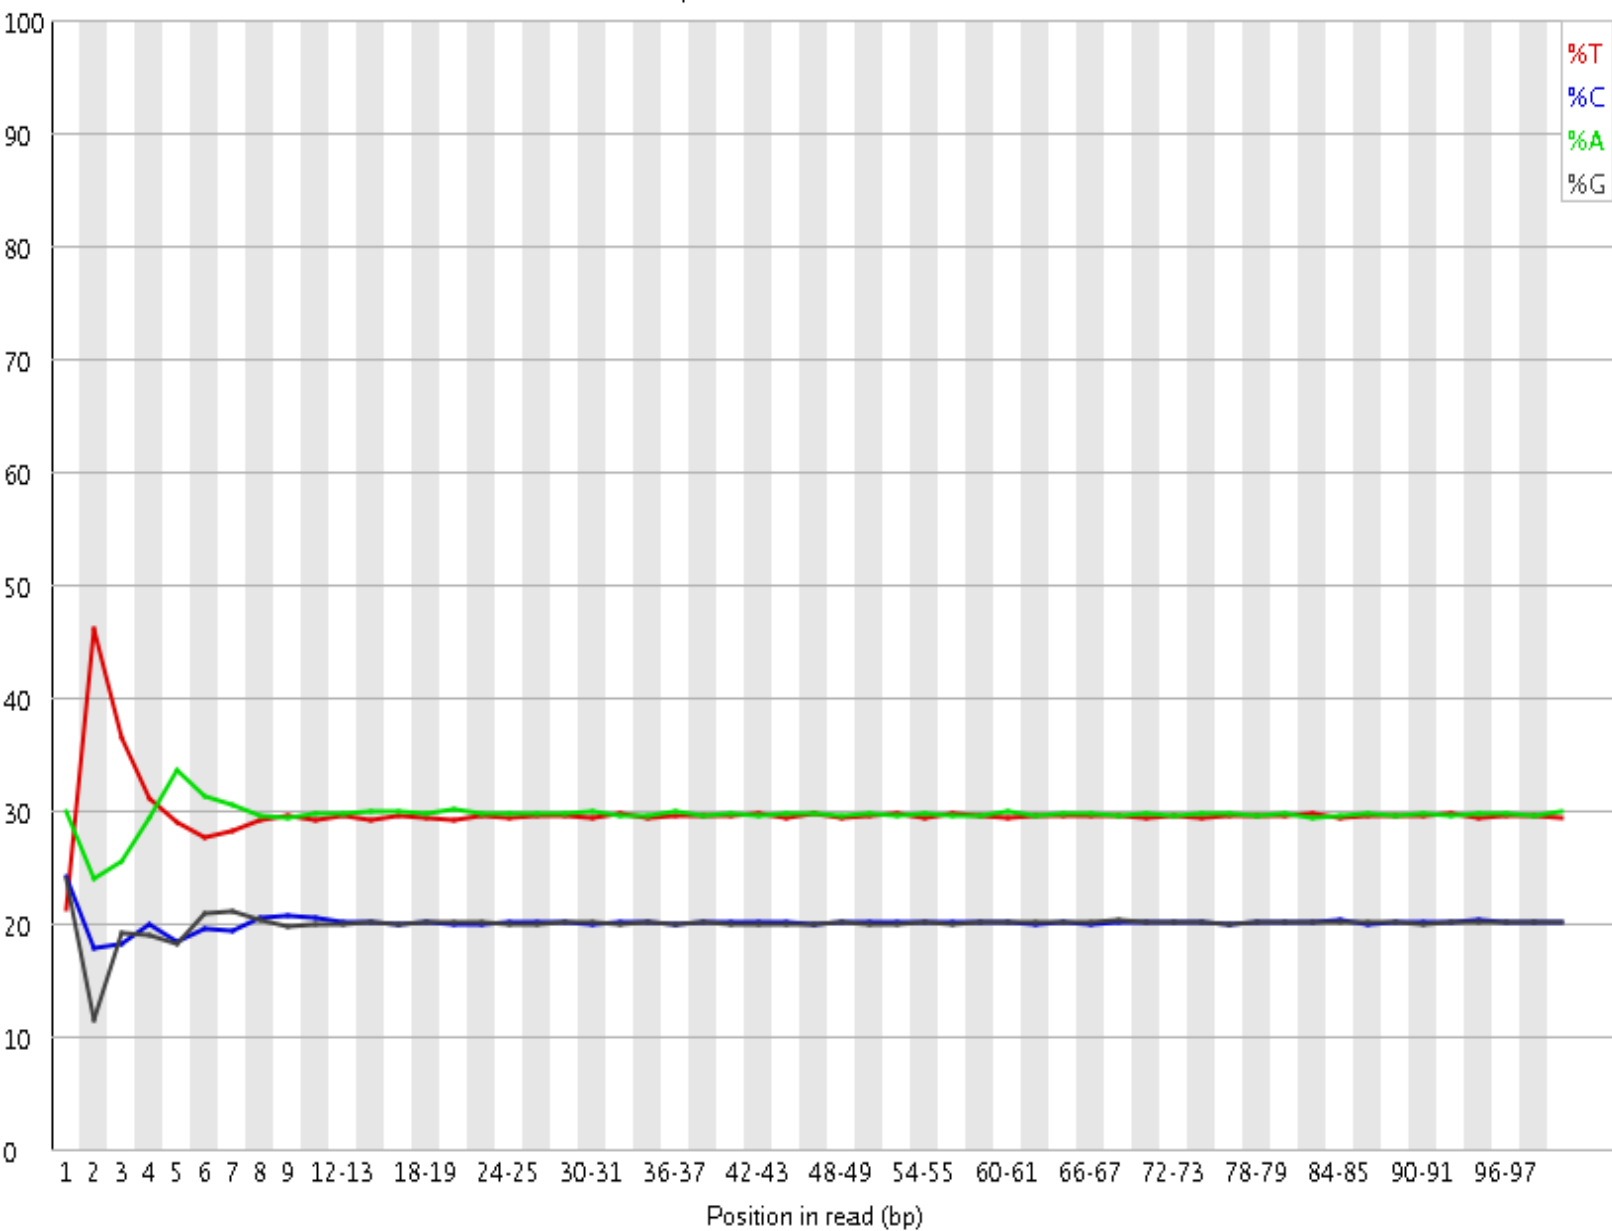

⚠ Per sequence GC content



GC distribution over all sequences

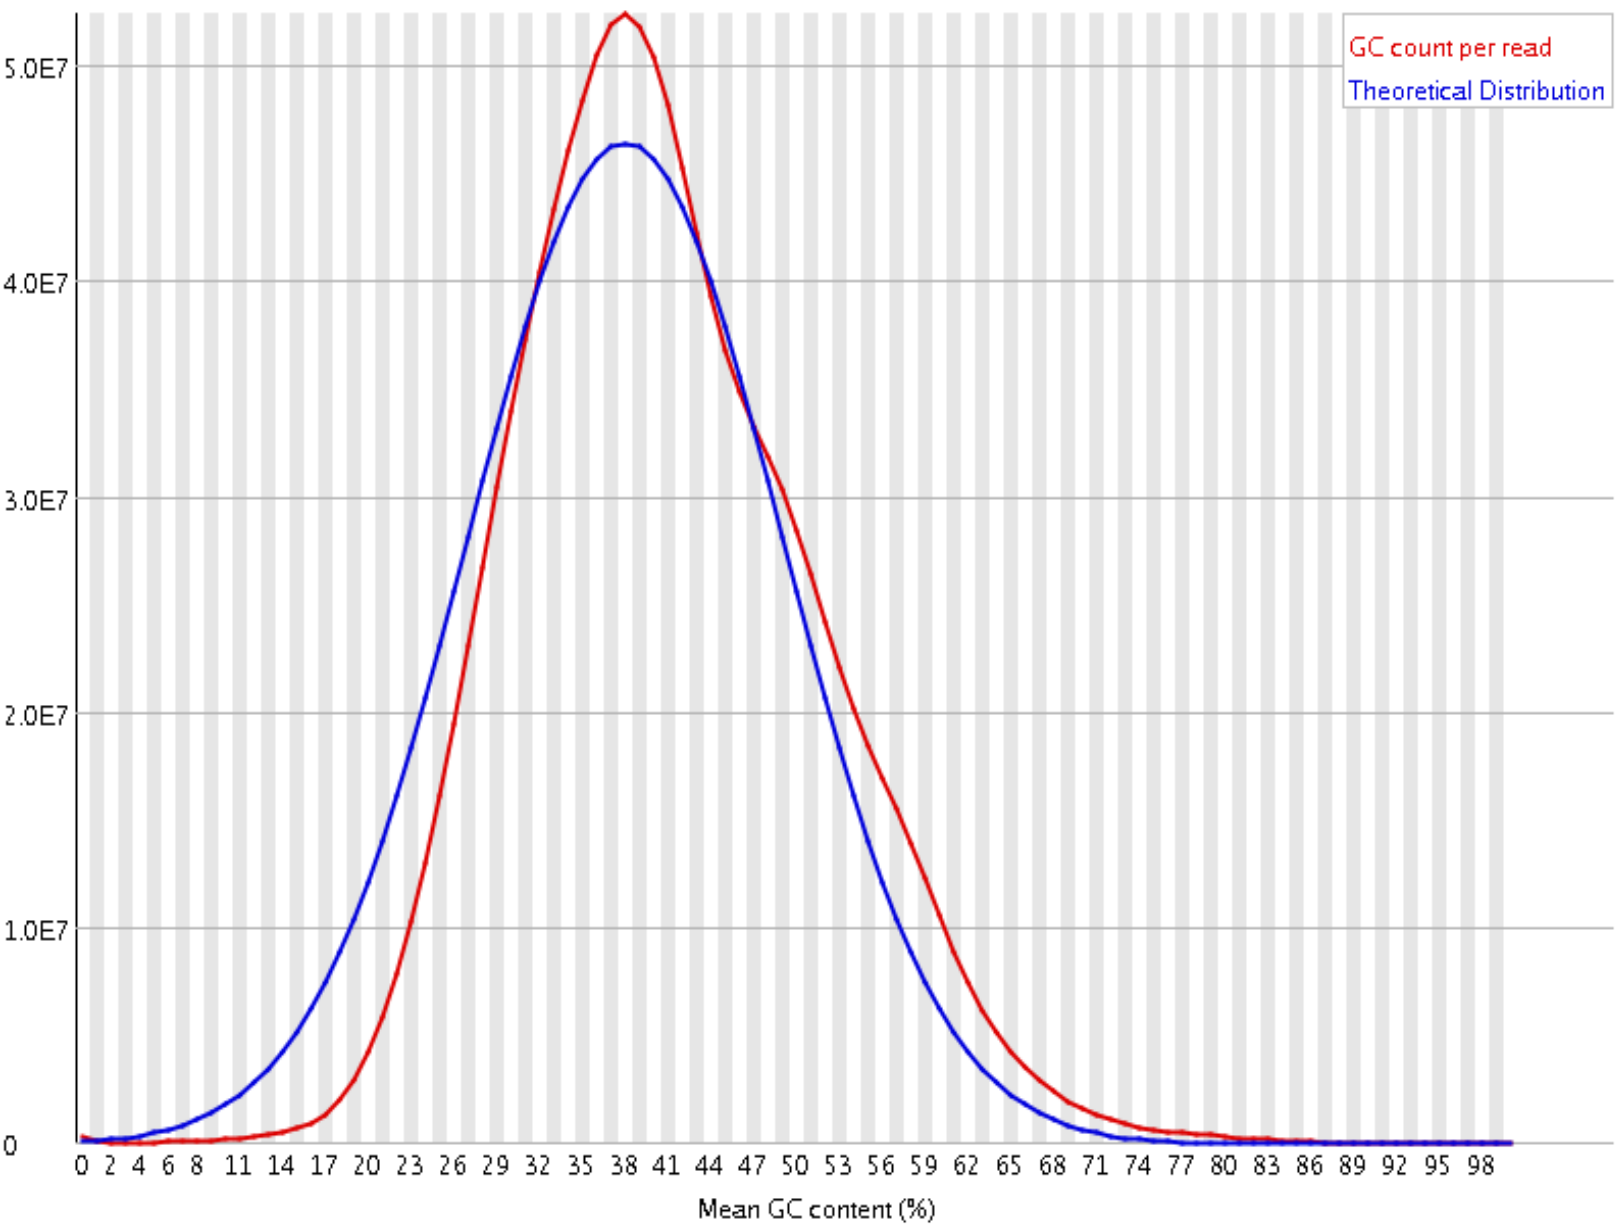

 **Per base N content**



 **Sequence Length Distribution**

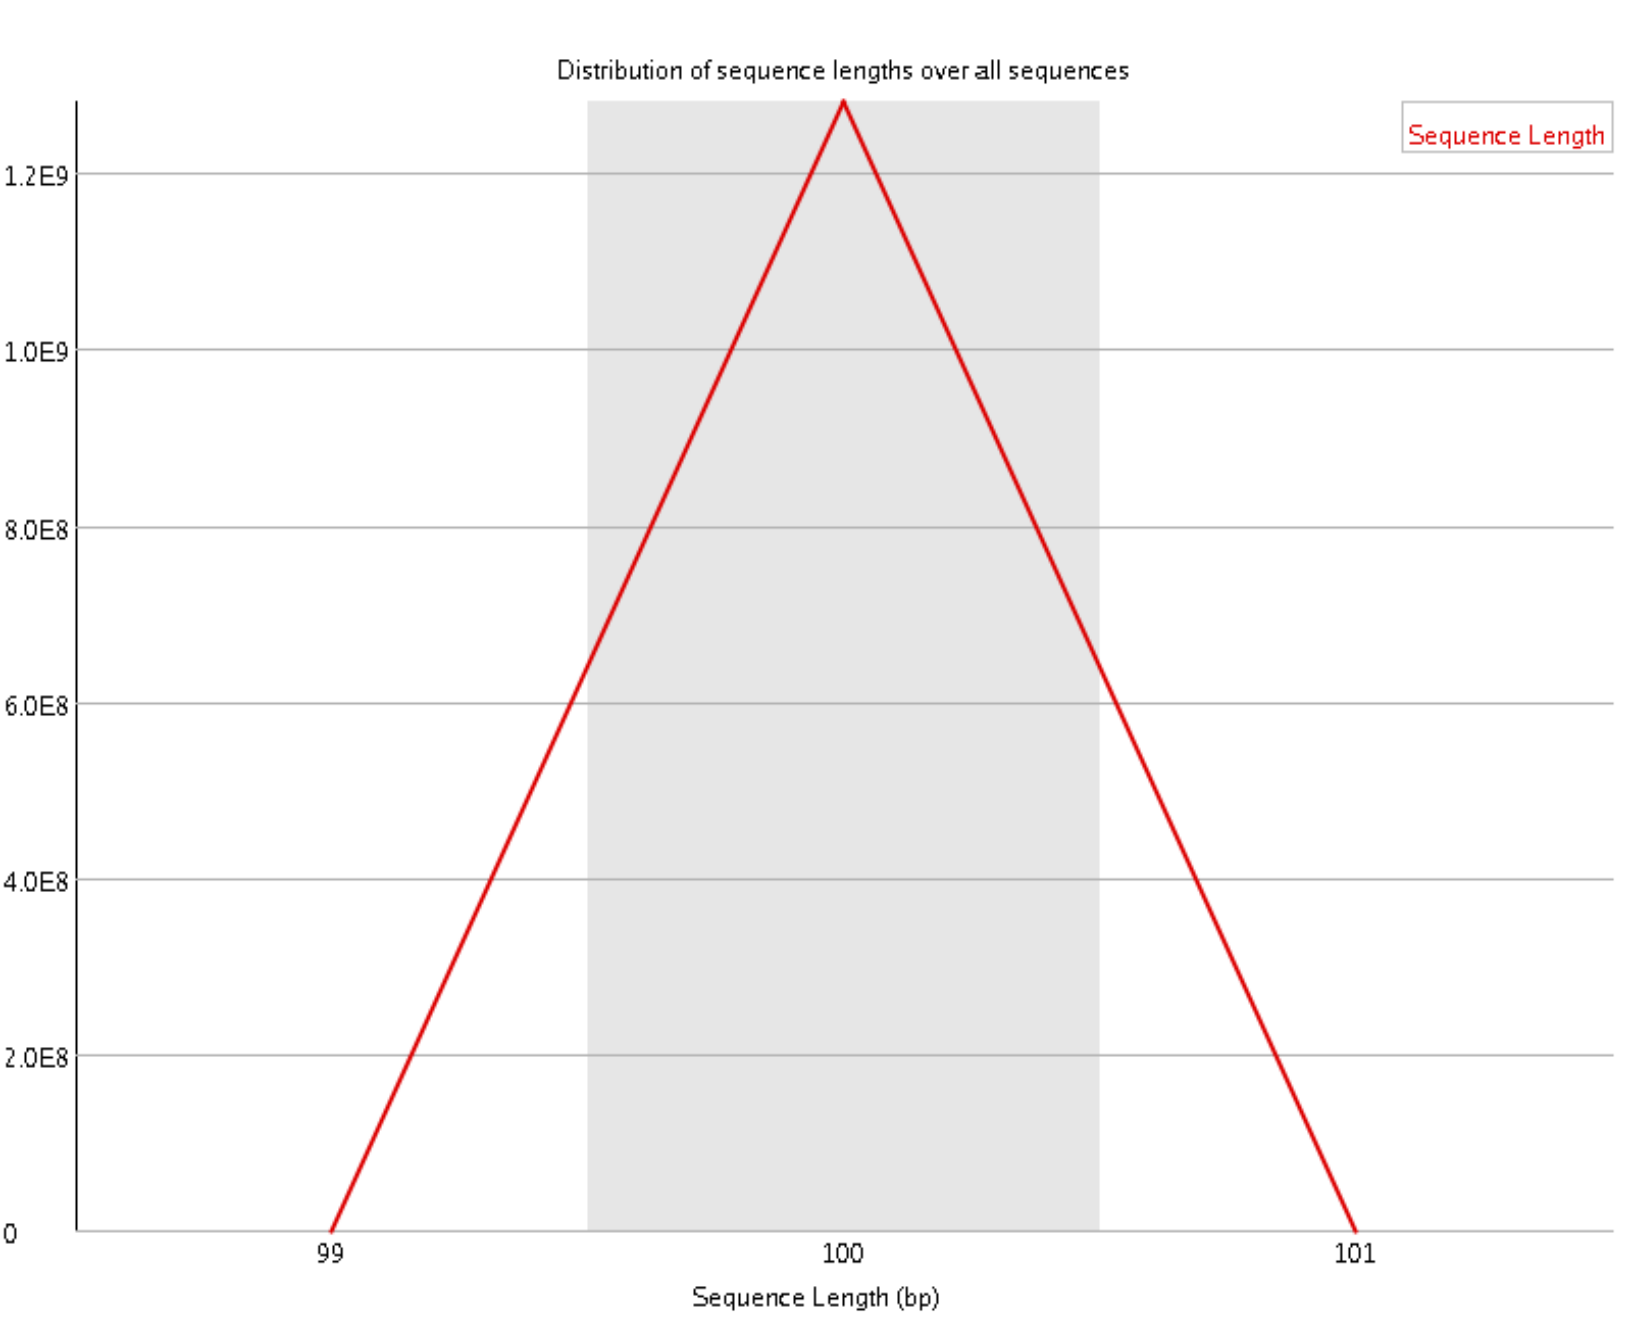

 **Sequence Duplication Levels**

Percent of seqs remaining if deduplicated 75.85%

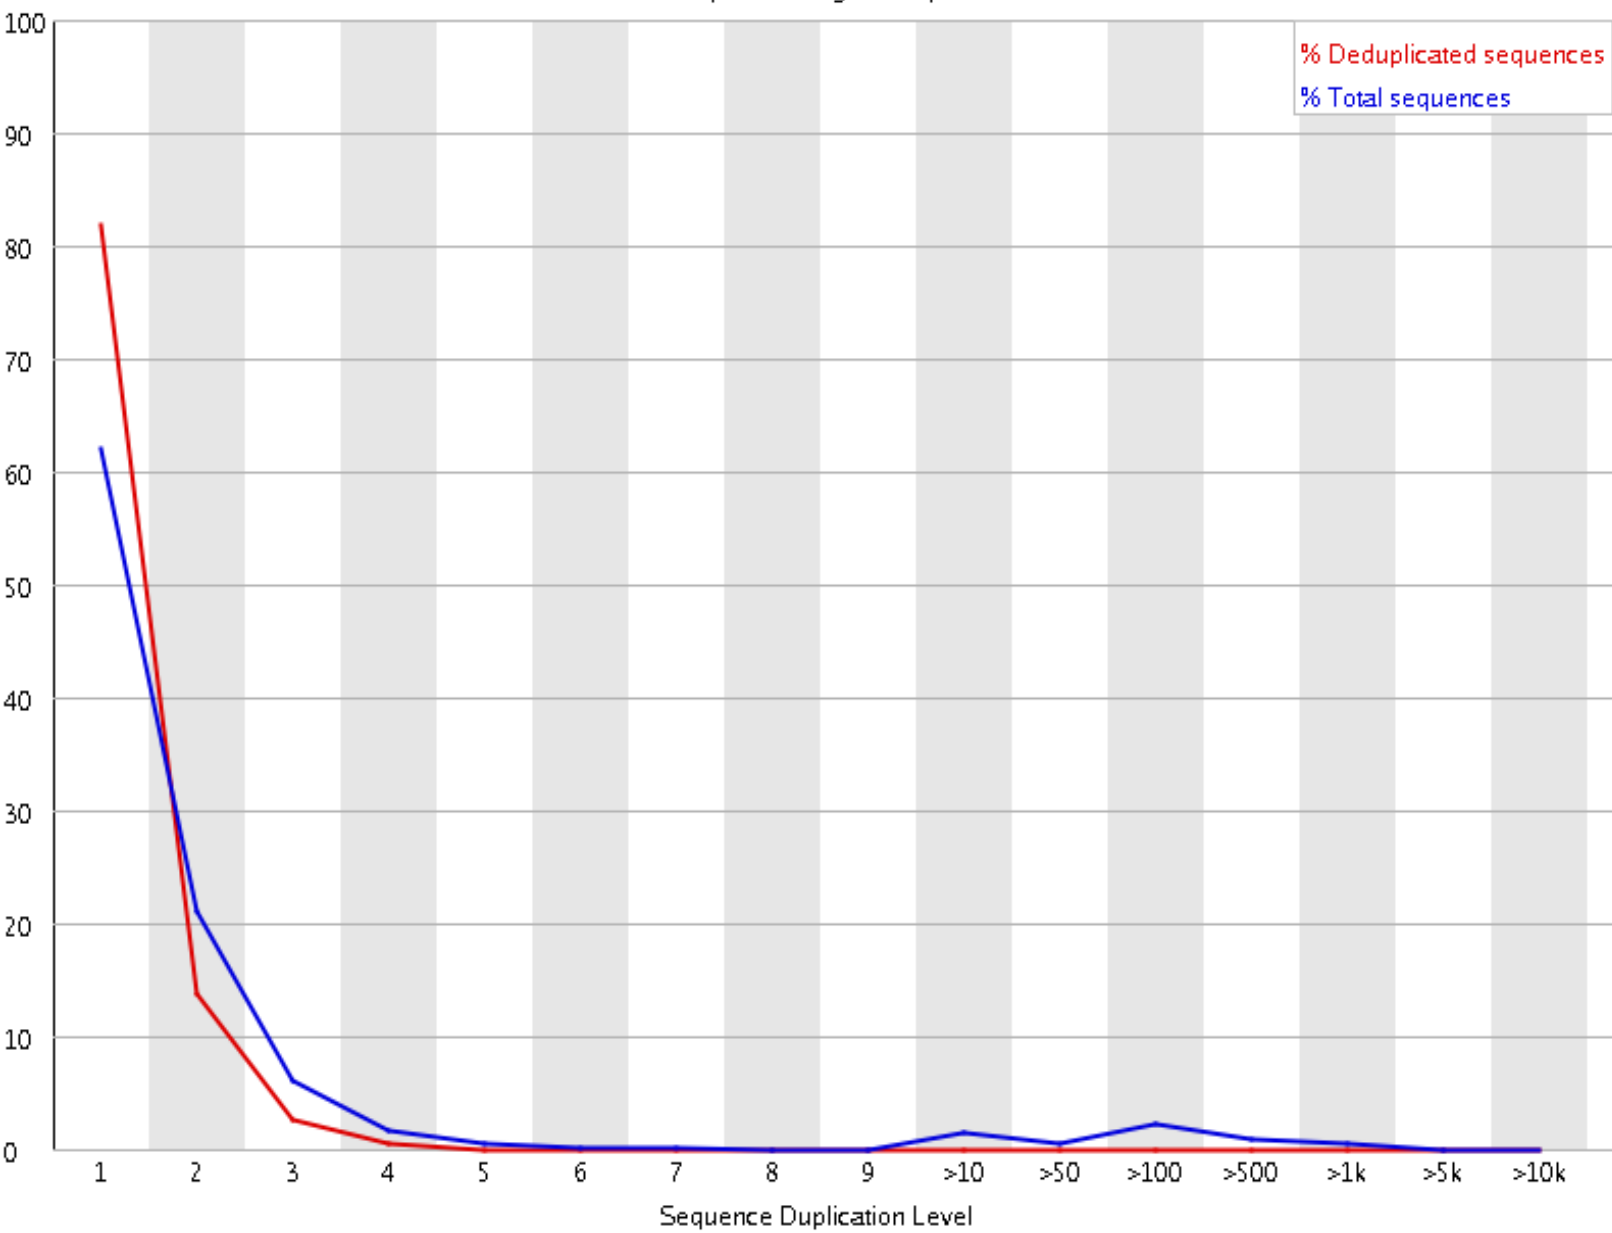

 **Overrepresented sequences**

No overrepresented sequences

 **Adapter Content**



## Summary

-  [Basic Statistics](#)
-  [Per base sequence quality](#)
-  [Per tile sequence quality](#)
-  [Per sequence quality scores](#)
-  [Per base sequence content](#)
-  [Per sequence GC content](#)
-  [Per base N content](#)
-  [Sequence Length Distribution](#)
-  [Sequence Duplication Levels](#)
-  [Overrepresented sequences](#)
-  [Adapter Content](#)

## Basic Statistics

| Measure                           | Value                   |
|-----------------------------------|-------------------------|
| Filename                          | stdin                   |
| File type                         | Conventional base calls |
| Encoding                          | Sanger / Illumina 1.9   |
| Total Sequences                   | 553277870               |
| Sequences flagged as poor quality | 0                       |
| Sequence length                   | 35-159                  |
| %GC                               | 41                      |

## Per base sequence quality

Quality scores across all bases (Sanger /Illumina 1.9 encoding)

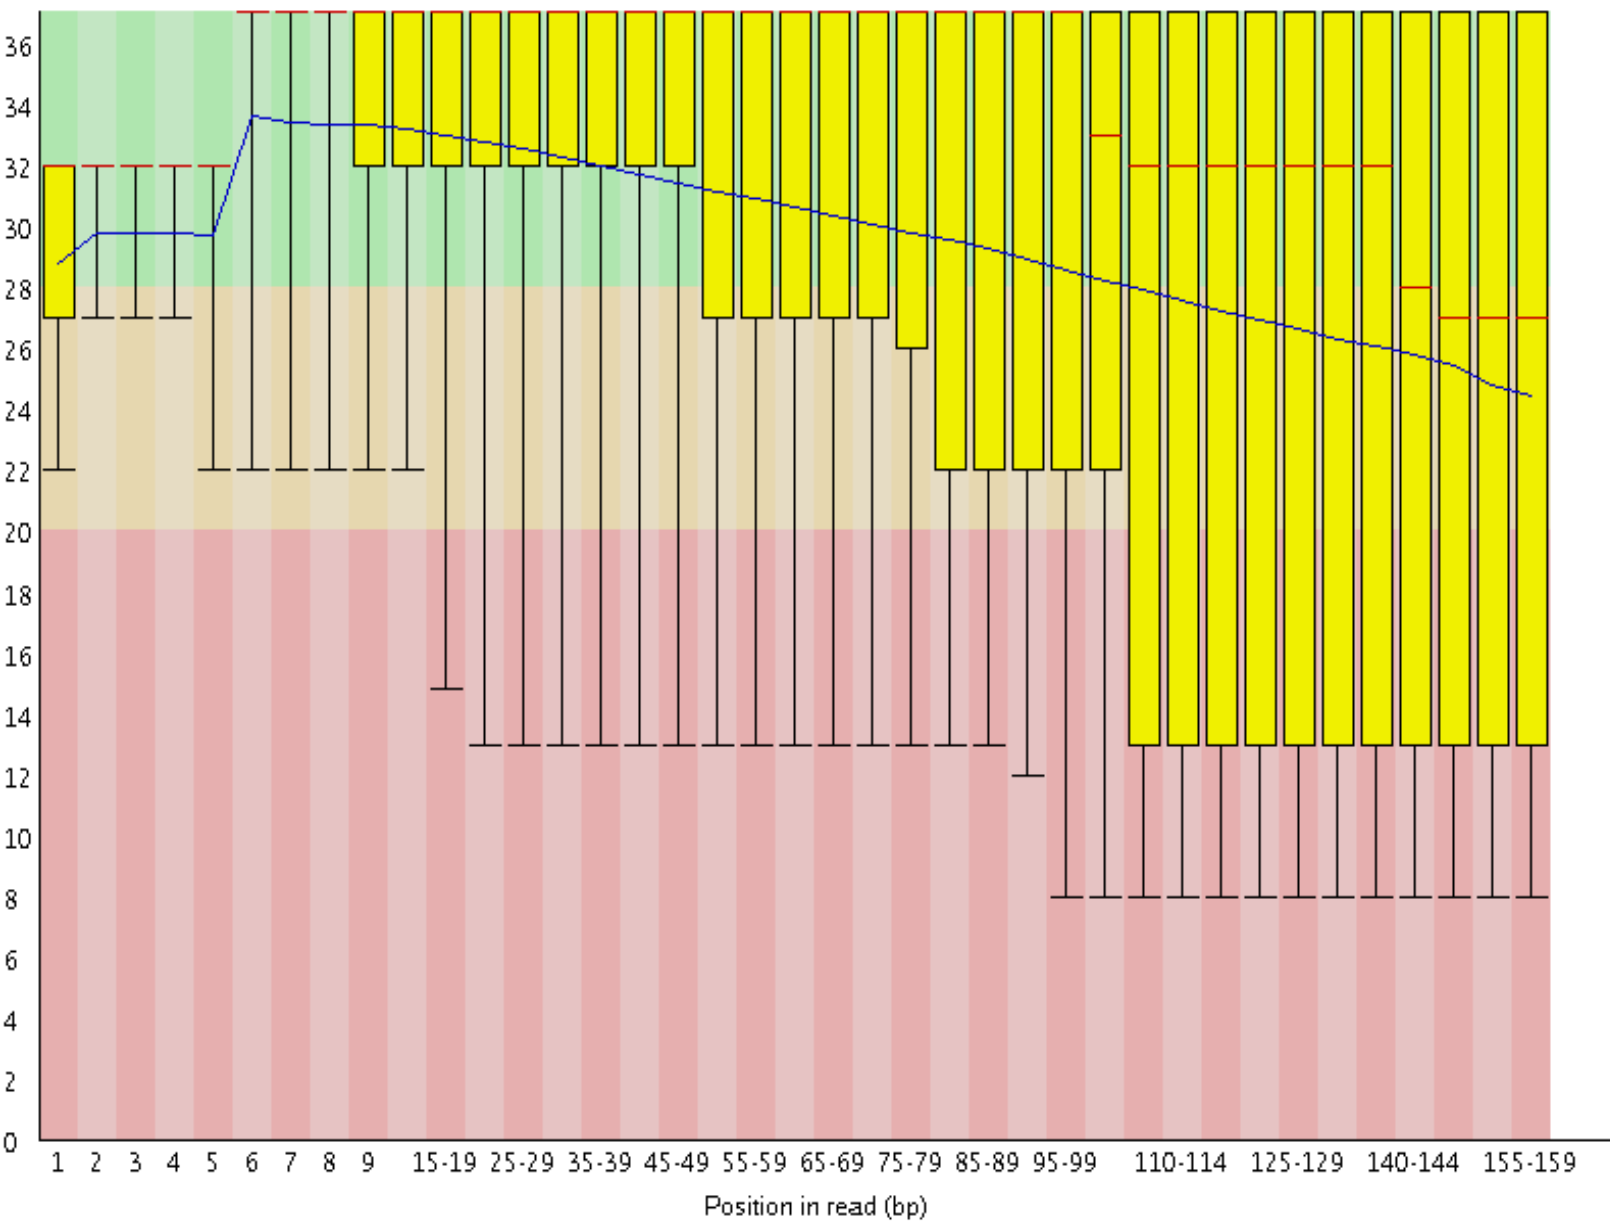

 Per tile sequence quality





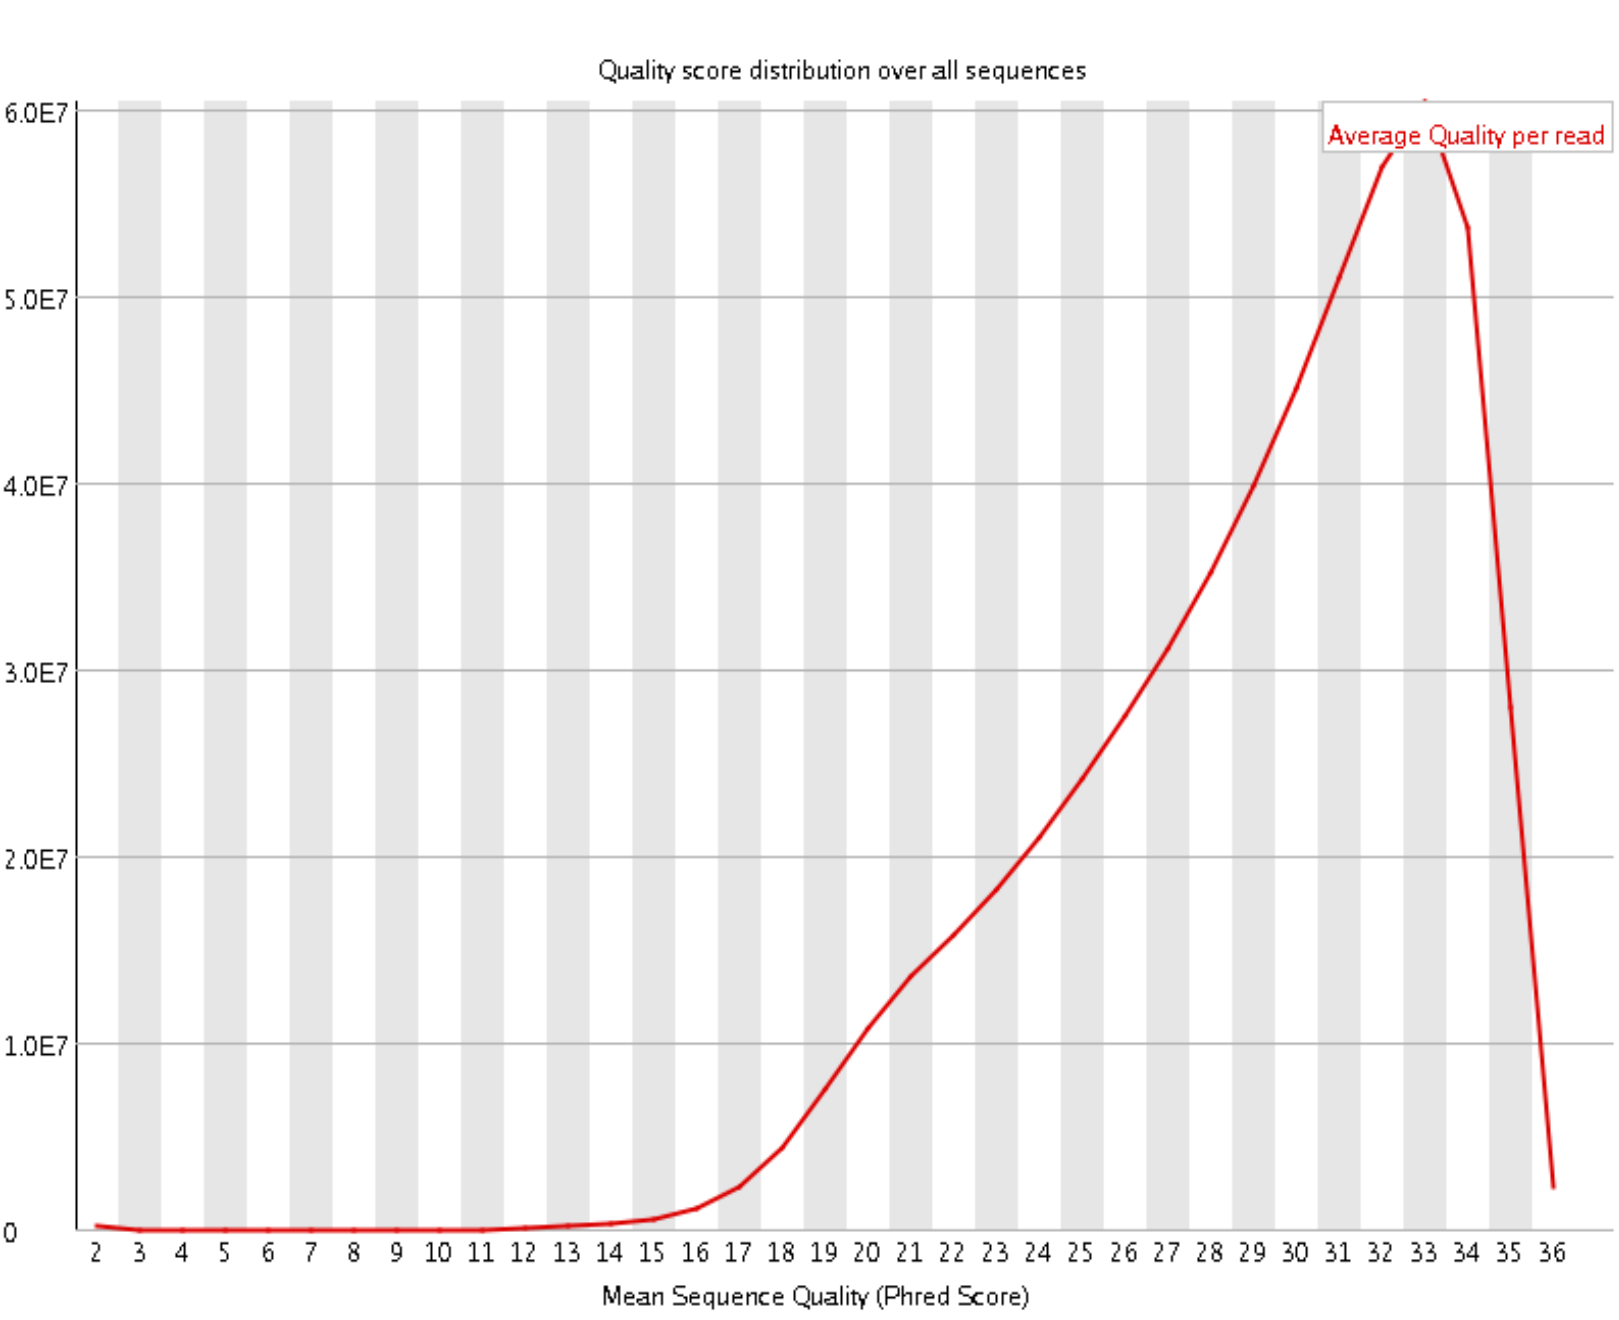

! Per base sequence content

Sequence content across all bases

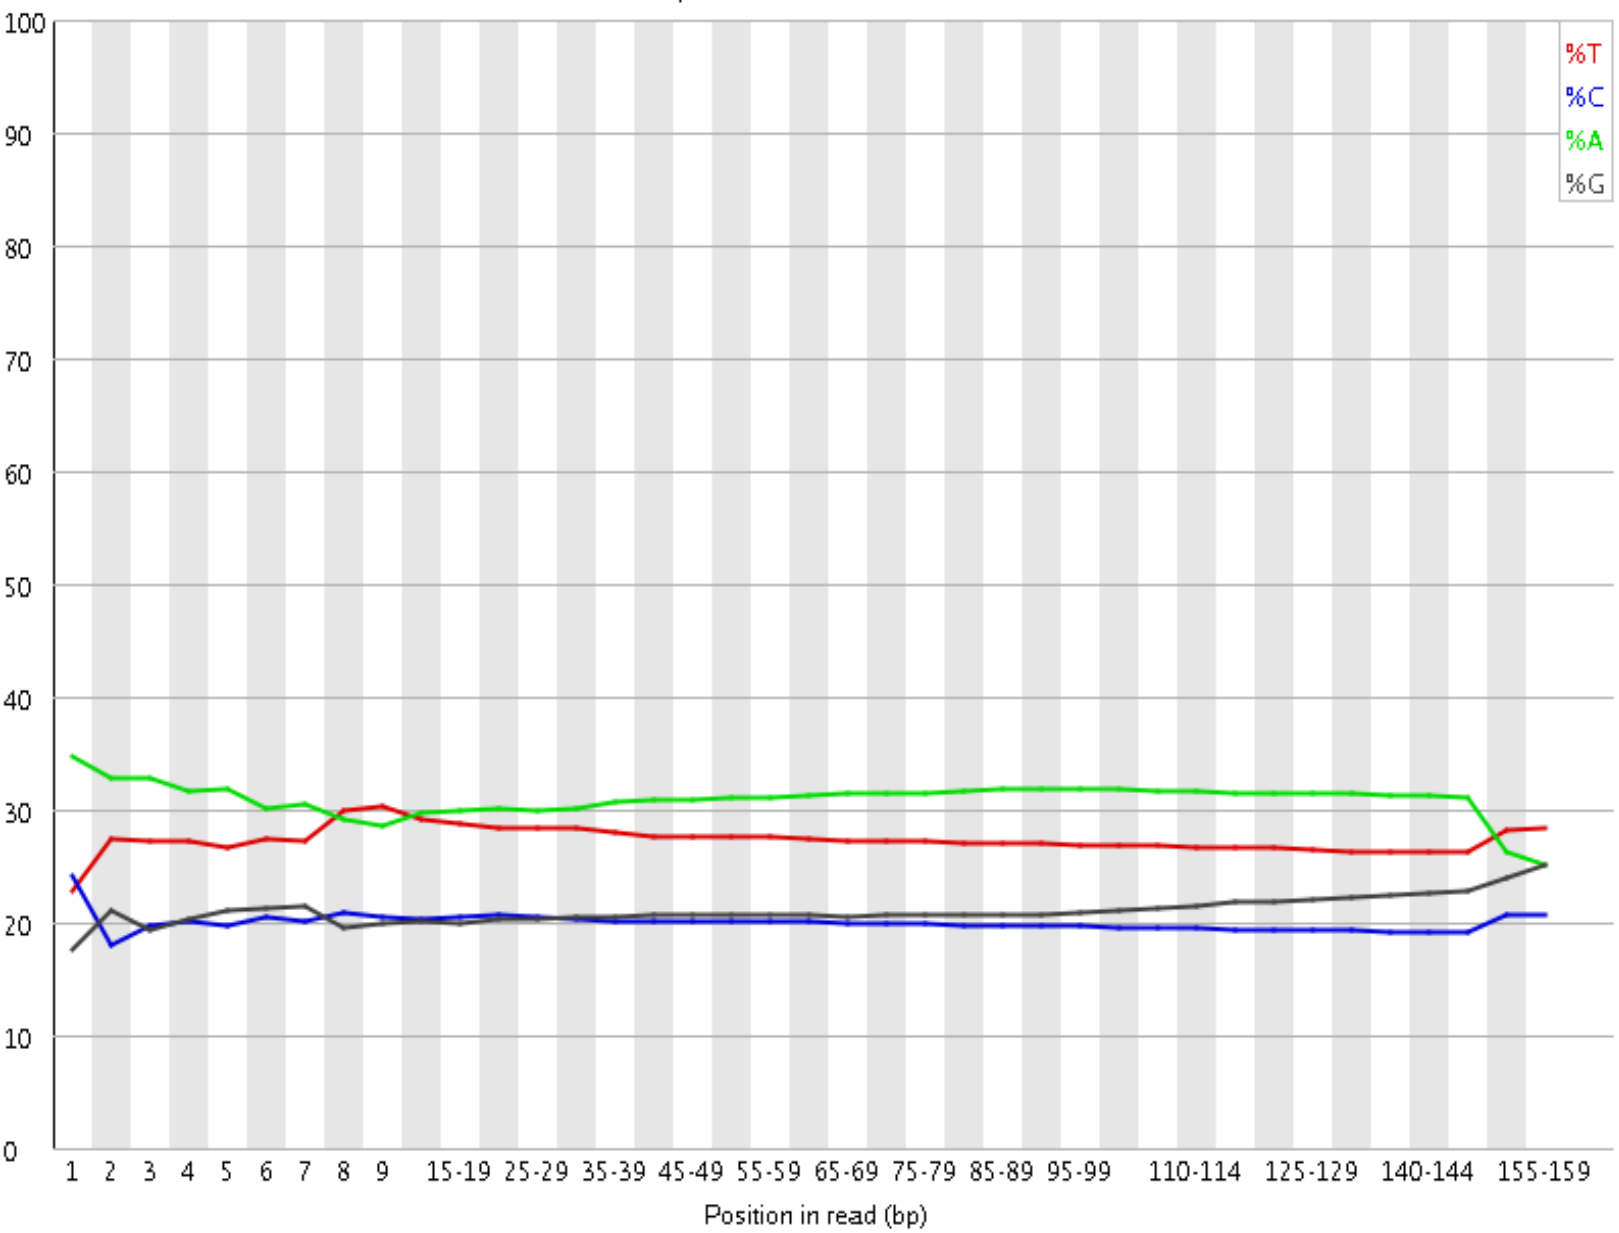

⚠ Per sequence GC content

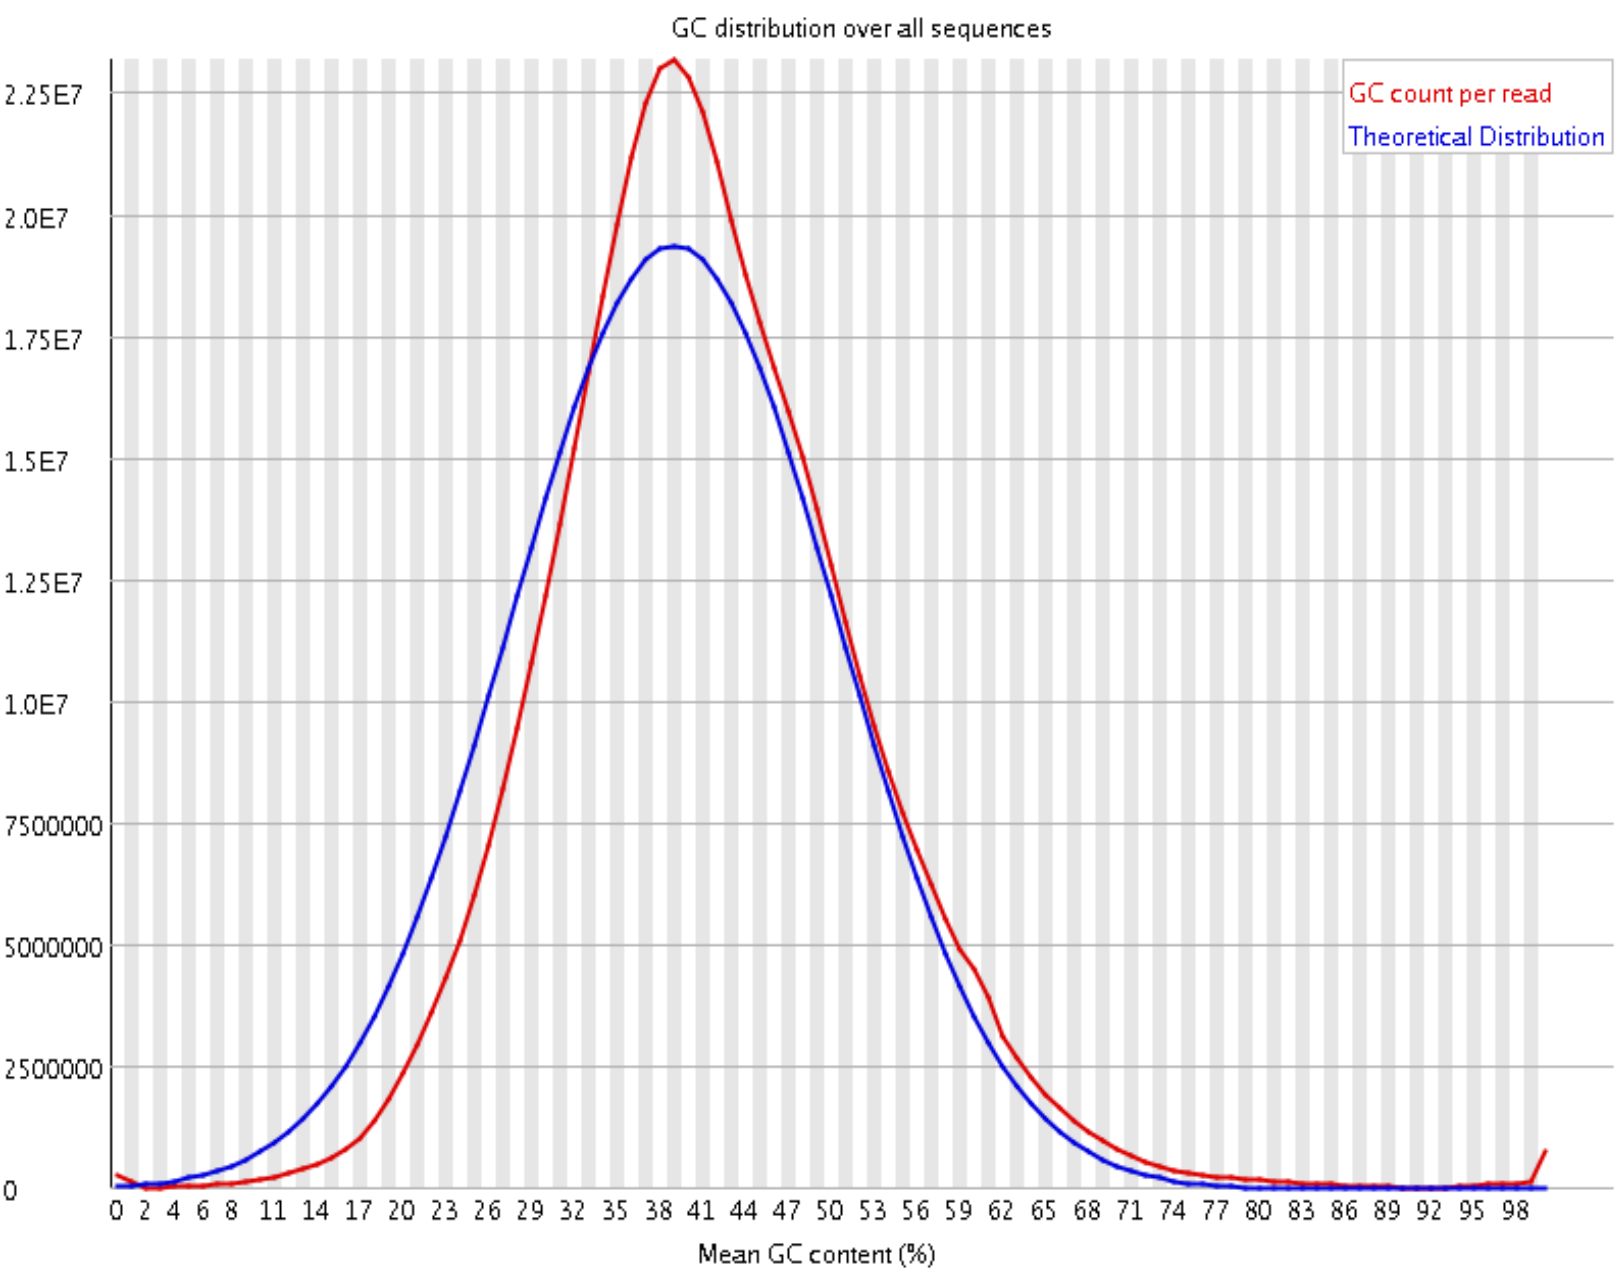

 **Per base N content**

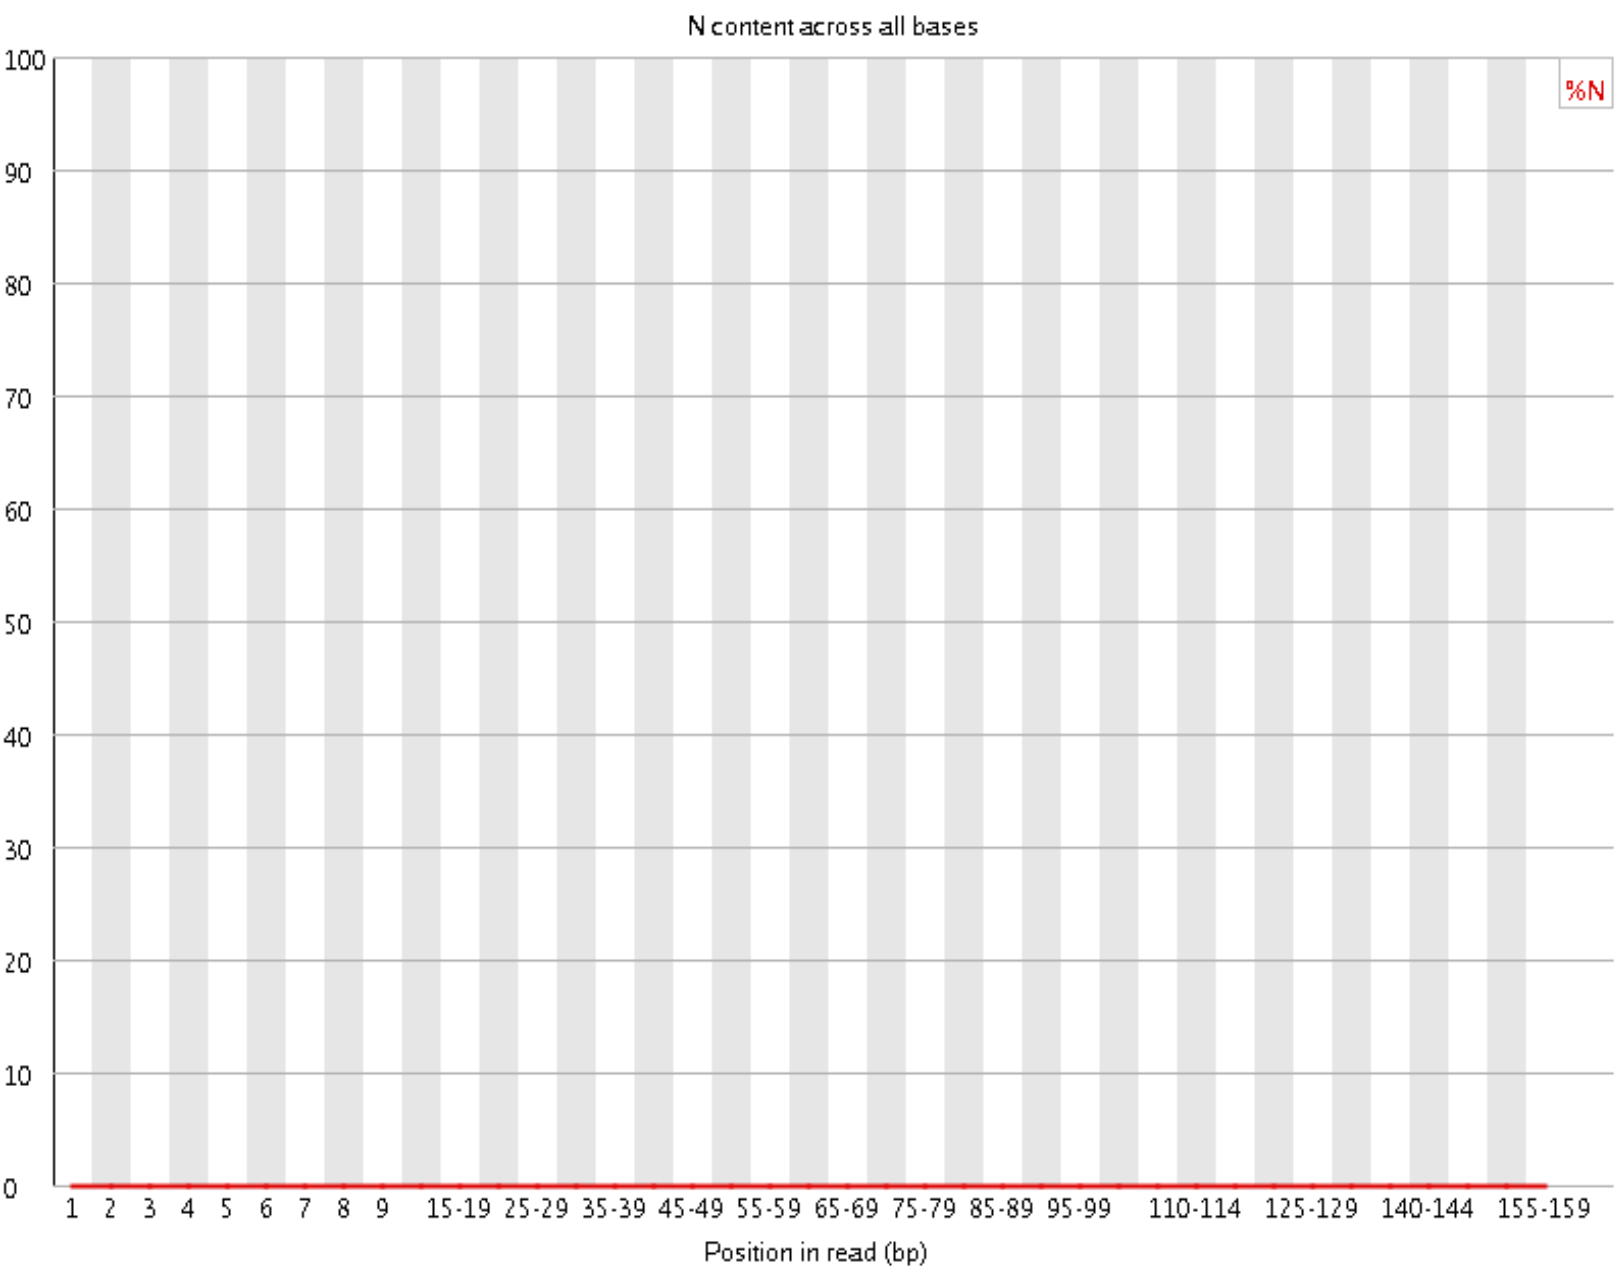

## Sequence Length Distribution

Distribution of sequence lengths over all sequences

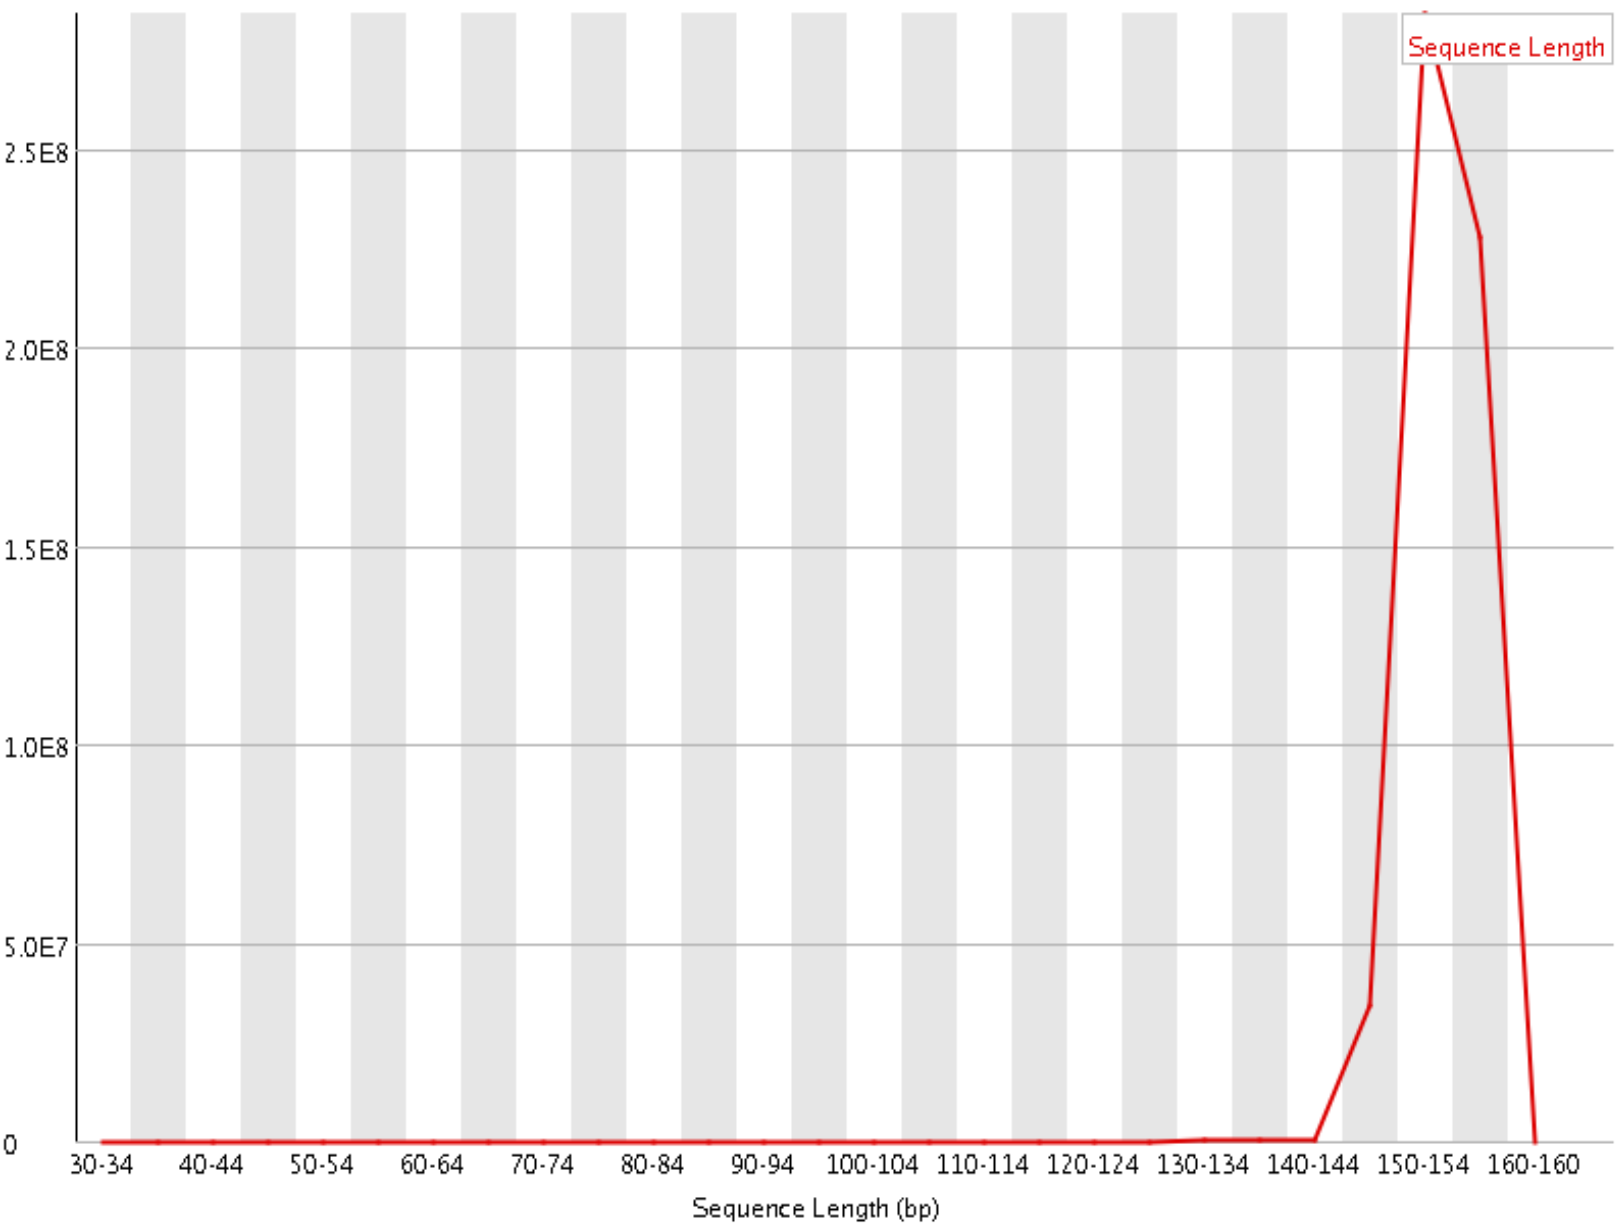

## ! Sequence Duplication Levels



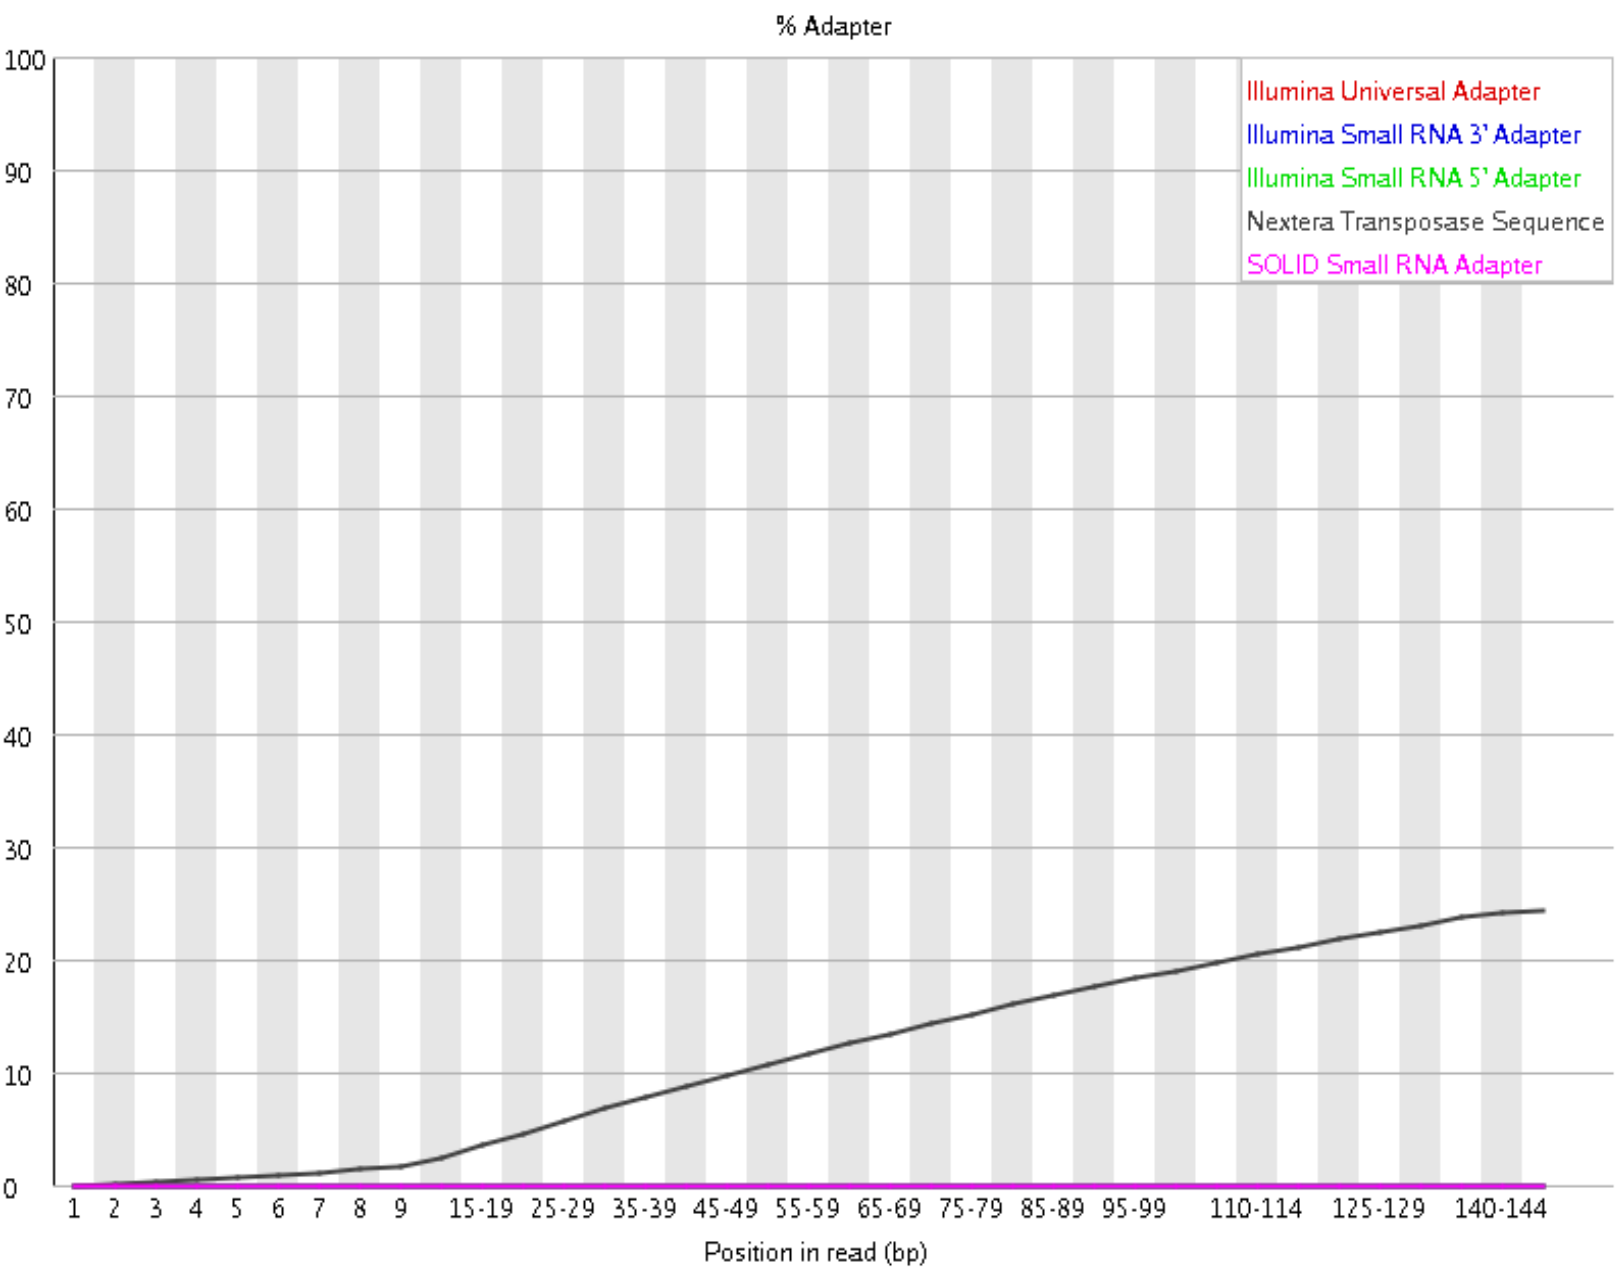

## Summary

-  [Basic Statistics](#)
-  [Per base sequence quality](#)
-  [Per tile sequence quality](#)
-  [Per sequence quality scores](#)
-  [Per base sequence content](#)
-  [Per sequence GC content](#)
-  [Per base N content](#)
-  [Sequence Length Distribution](#)
-  [Sequence Duplication Levels](#)
-  [Overrepresented sequences](#)
-  [Adapter Content](#)

## Basic Statistics

| Measure                           | Value                   |
|-----------------------------------|-------------------------|
| Filename                          | stdin                   |
| File type                         | Conventional base calls |
| Encoding                          | Sanger / Illumina 1.9   |
| Total Sequences                   | 1280576580              |
| Sequences flagged as poor quality | 0                       |
| Sequence length                   | 100                     |
| %GC                               | 40                      |

## Per base sequence quality



Quality scores across all bases (Sanger / Illumina 1.9 encoding)



✔ Per tile sequence quality

Quality per tile

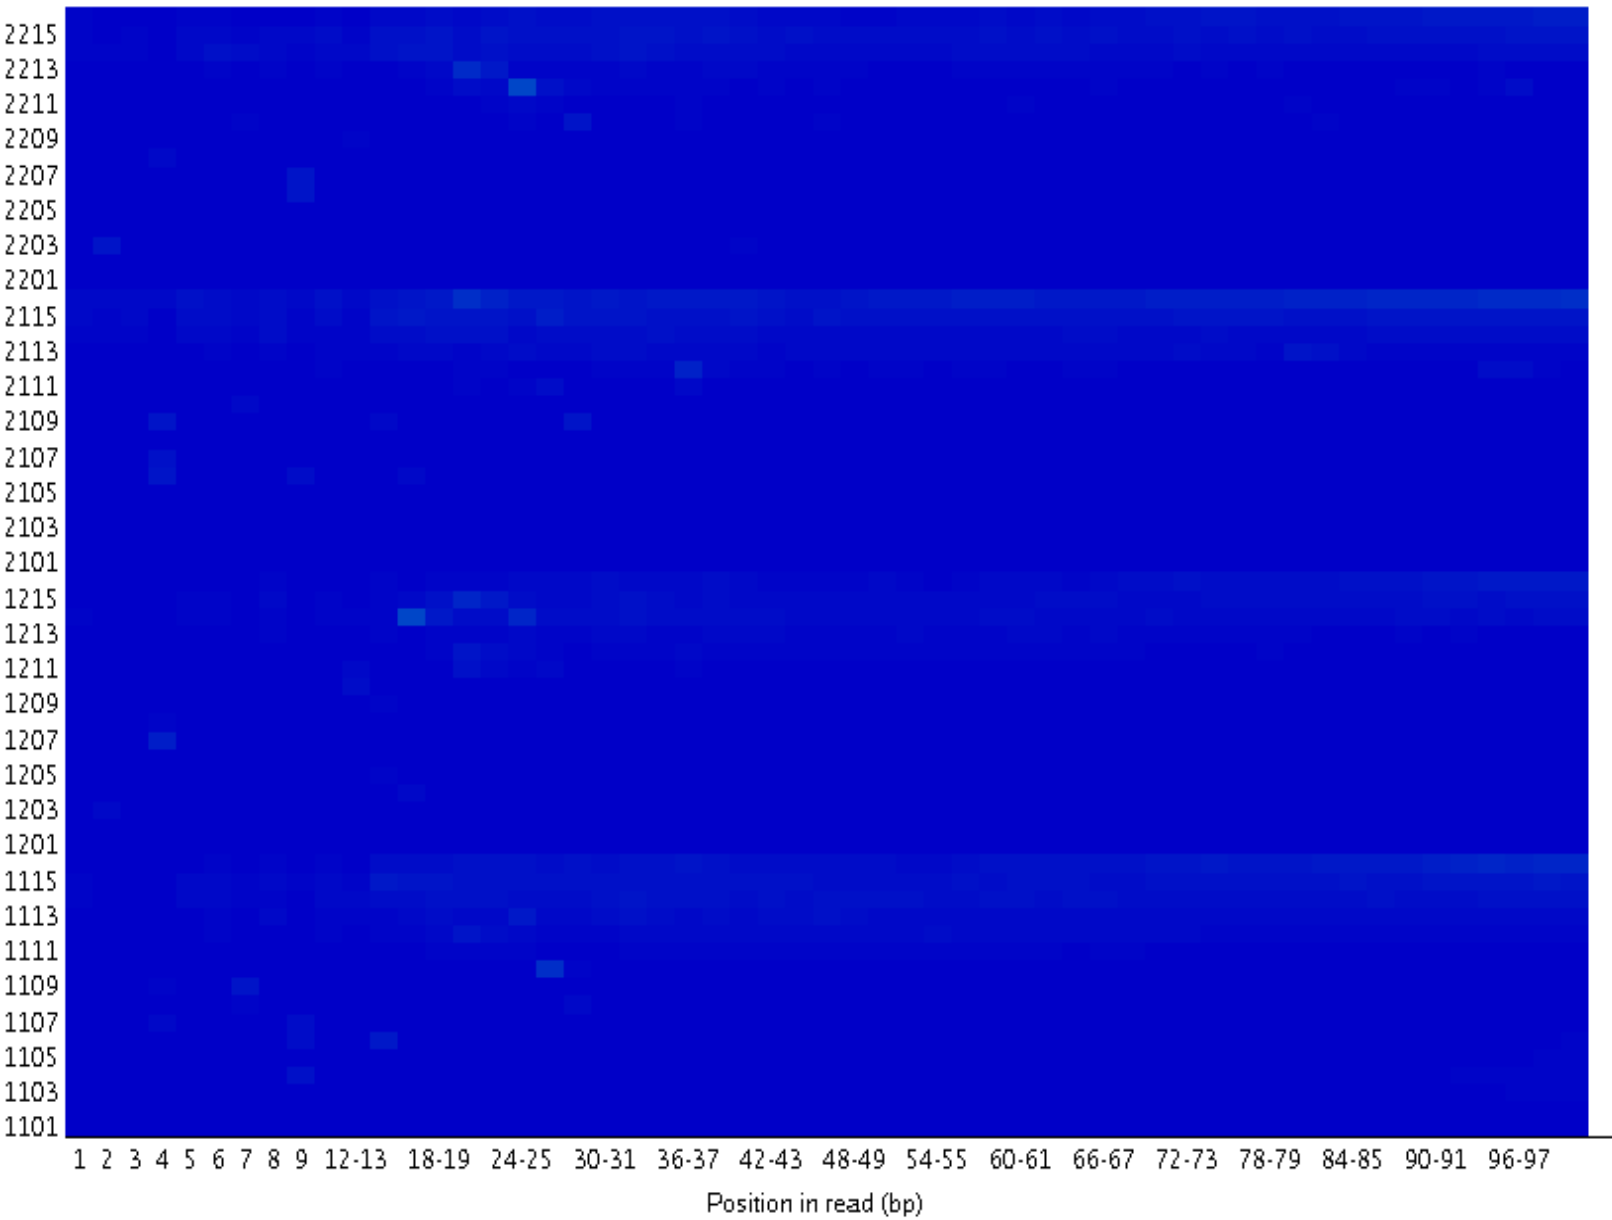

 **Per sequence quality scores**

Quality score distribution over all sequences



❌ Per base sequence content

Sequence content across all bases



⚠ Per sequence GC content

GC distribution over all sequences



 **Per base N content**



 **Sequence Length Distribution**



 **Sequence Duplication Levels**

Percent of seqs remaining if deduplicated 75.85%

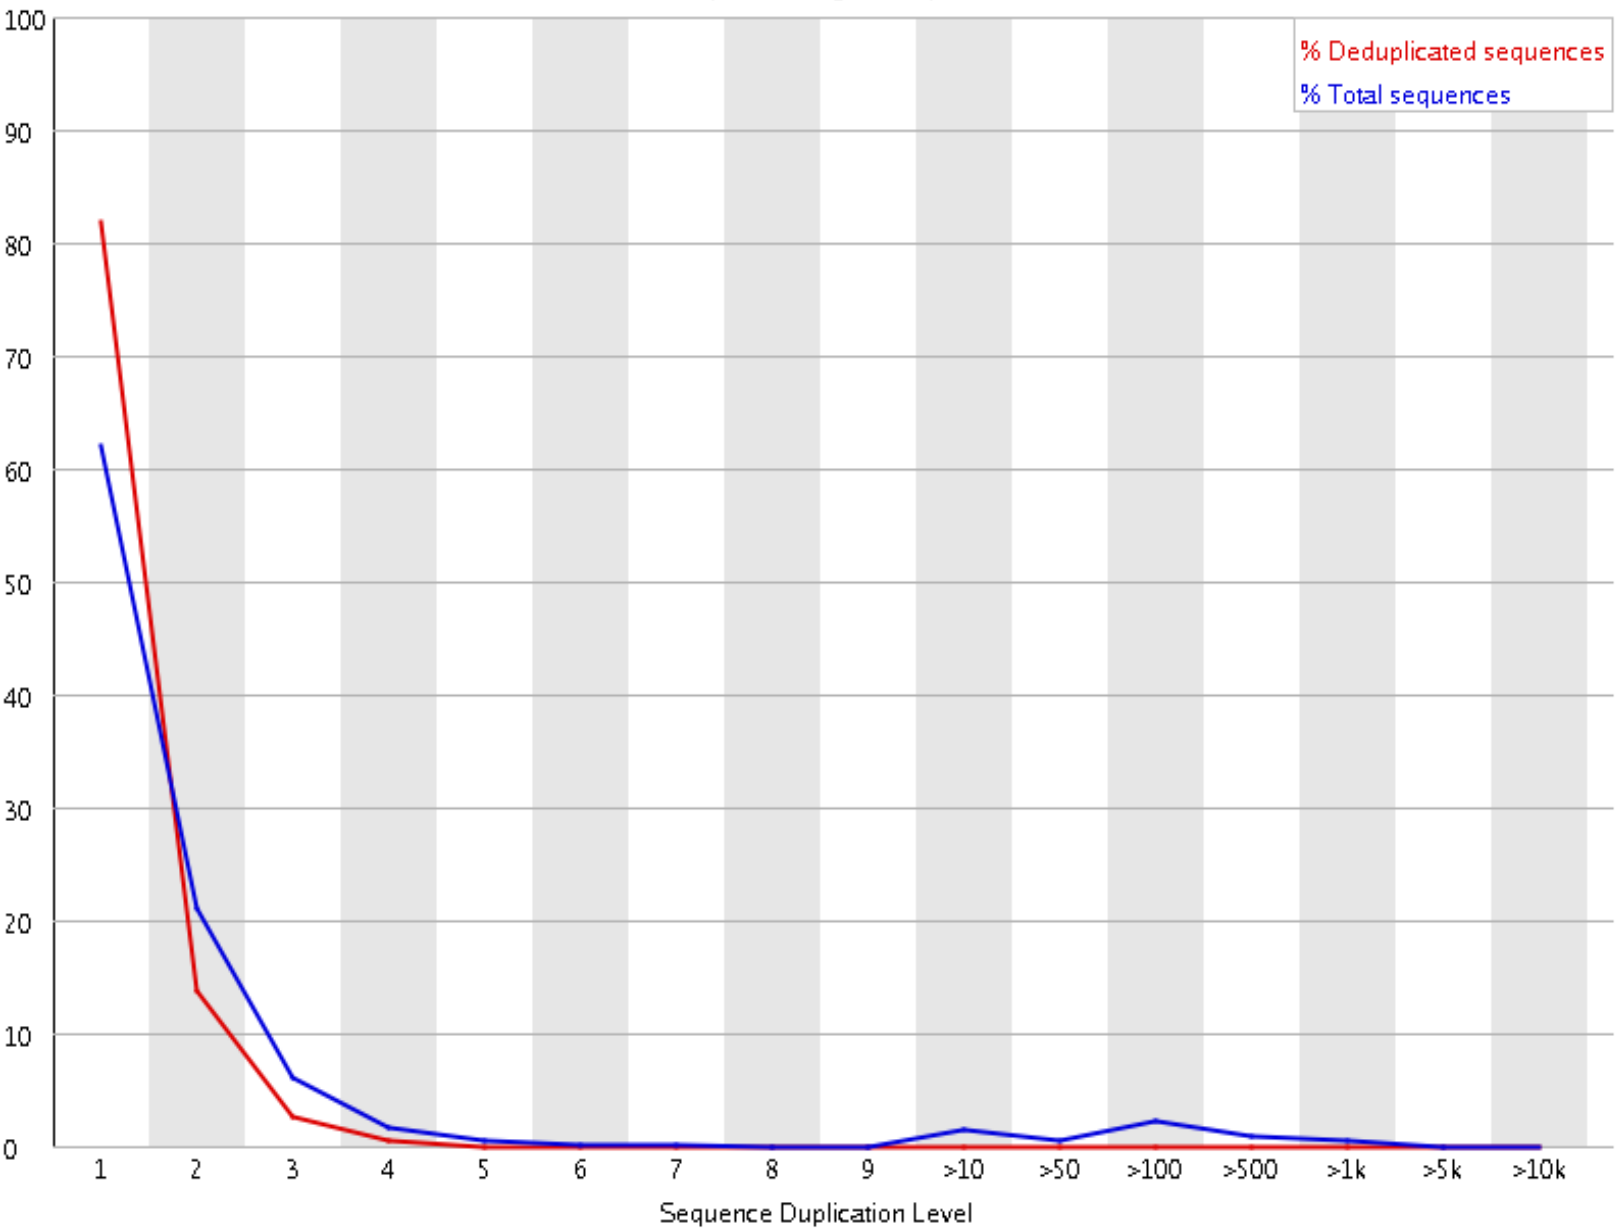

 **Overrepresented sequences**

No overrepresented sequences

 **Adapter Content**





## Summary

-  [Basic Statistics](#)
-  [Per base sequence quality](#)
-  [Per tile sequence quality](#)
-  [Per sequence quality scores](#)
-  [Per base sequence content](#)
-  [Per sequence GC content](#)
-  [Per base N content](#)
-  [Sequence Length Distribution](#)
-  [Sequence Duplication Levels](#)
-  [Overrepresented sequences](#)
-  [Adapter Content](#)

## Basic Statistics

| Measure                           | Value                   |
|-----------------------------------|-------------------------|
| Filename                          | stdin                   |
| File type                         | Conventional base calls |
| Encoding                          | Sanger / Illumina 1.9   |
| Total Sequences                   | 553277870               |
| Sequences flagged as poor quality | 0                       |
| Sequence length                   | 35-159                  |
| %GC                               | 41                      |

## Per base sequence quality

Quality scores across all bases (Sanger / Illumina 1.9 encoding)

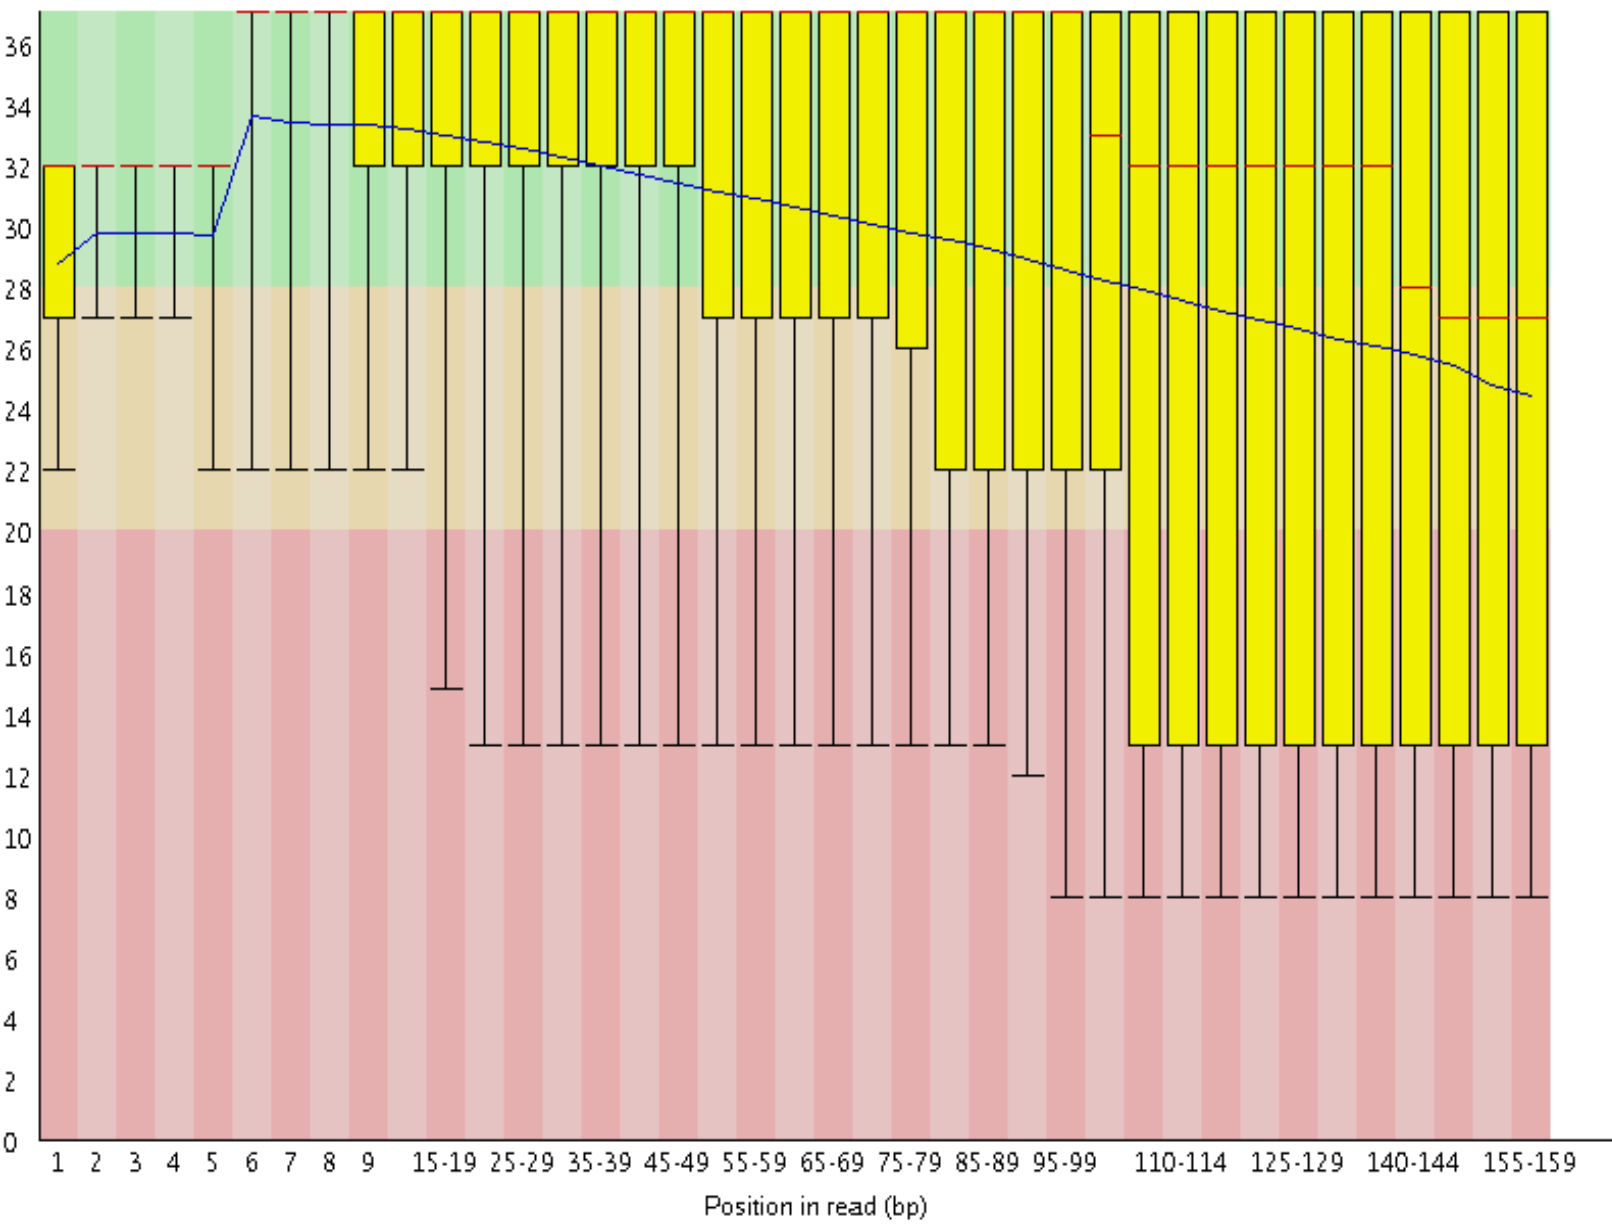

 Per tile sequence quality

Quality per tile

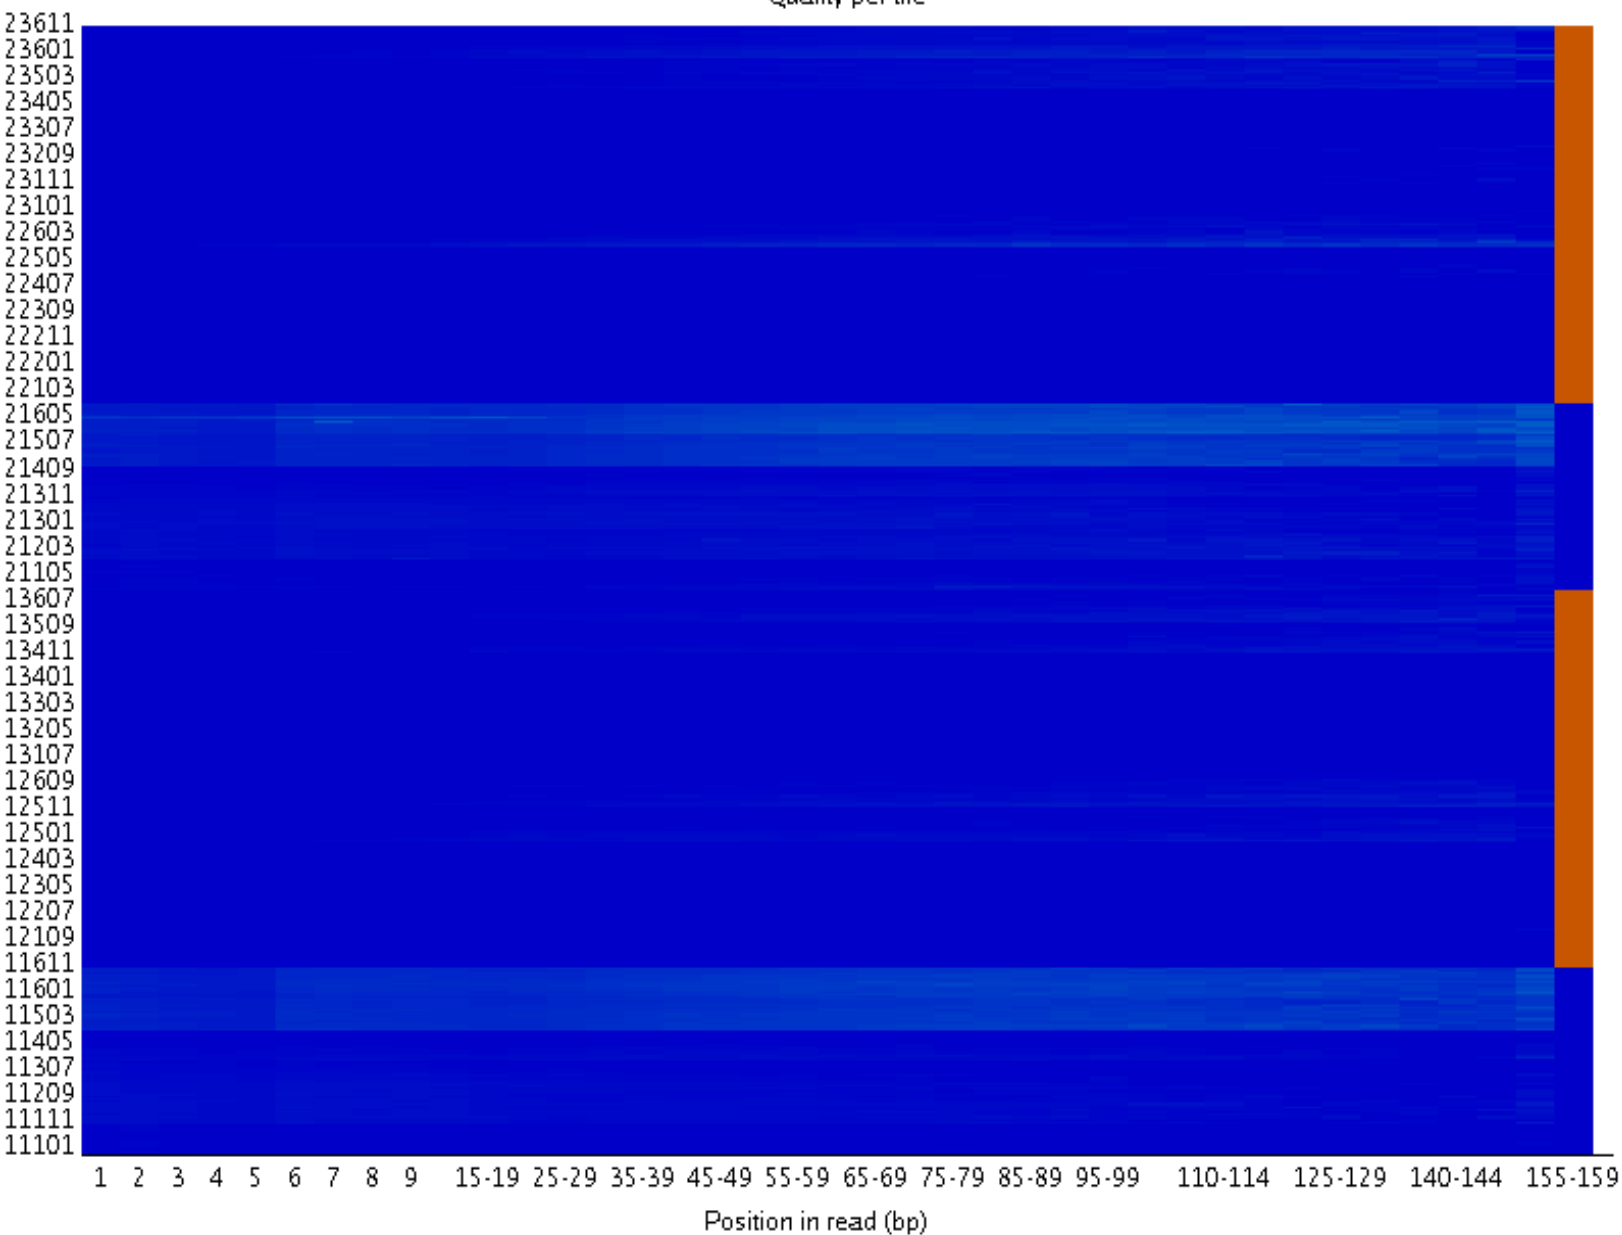

 **Per sequence quality scores**



! Per base sequence content

Sequence content across all bases



⚠ Per sequence GC content



 **Per base N content**



## Sequence Length Distribution



Distribution of sequence lengths over all sequences

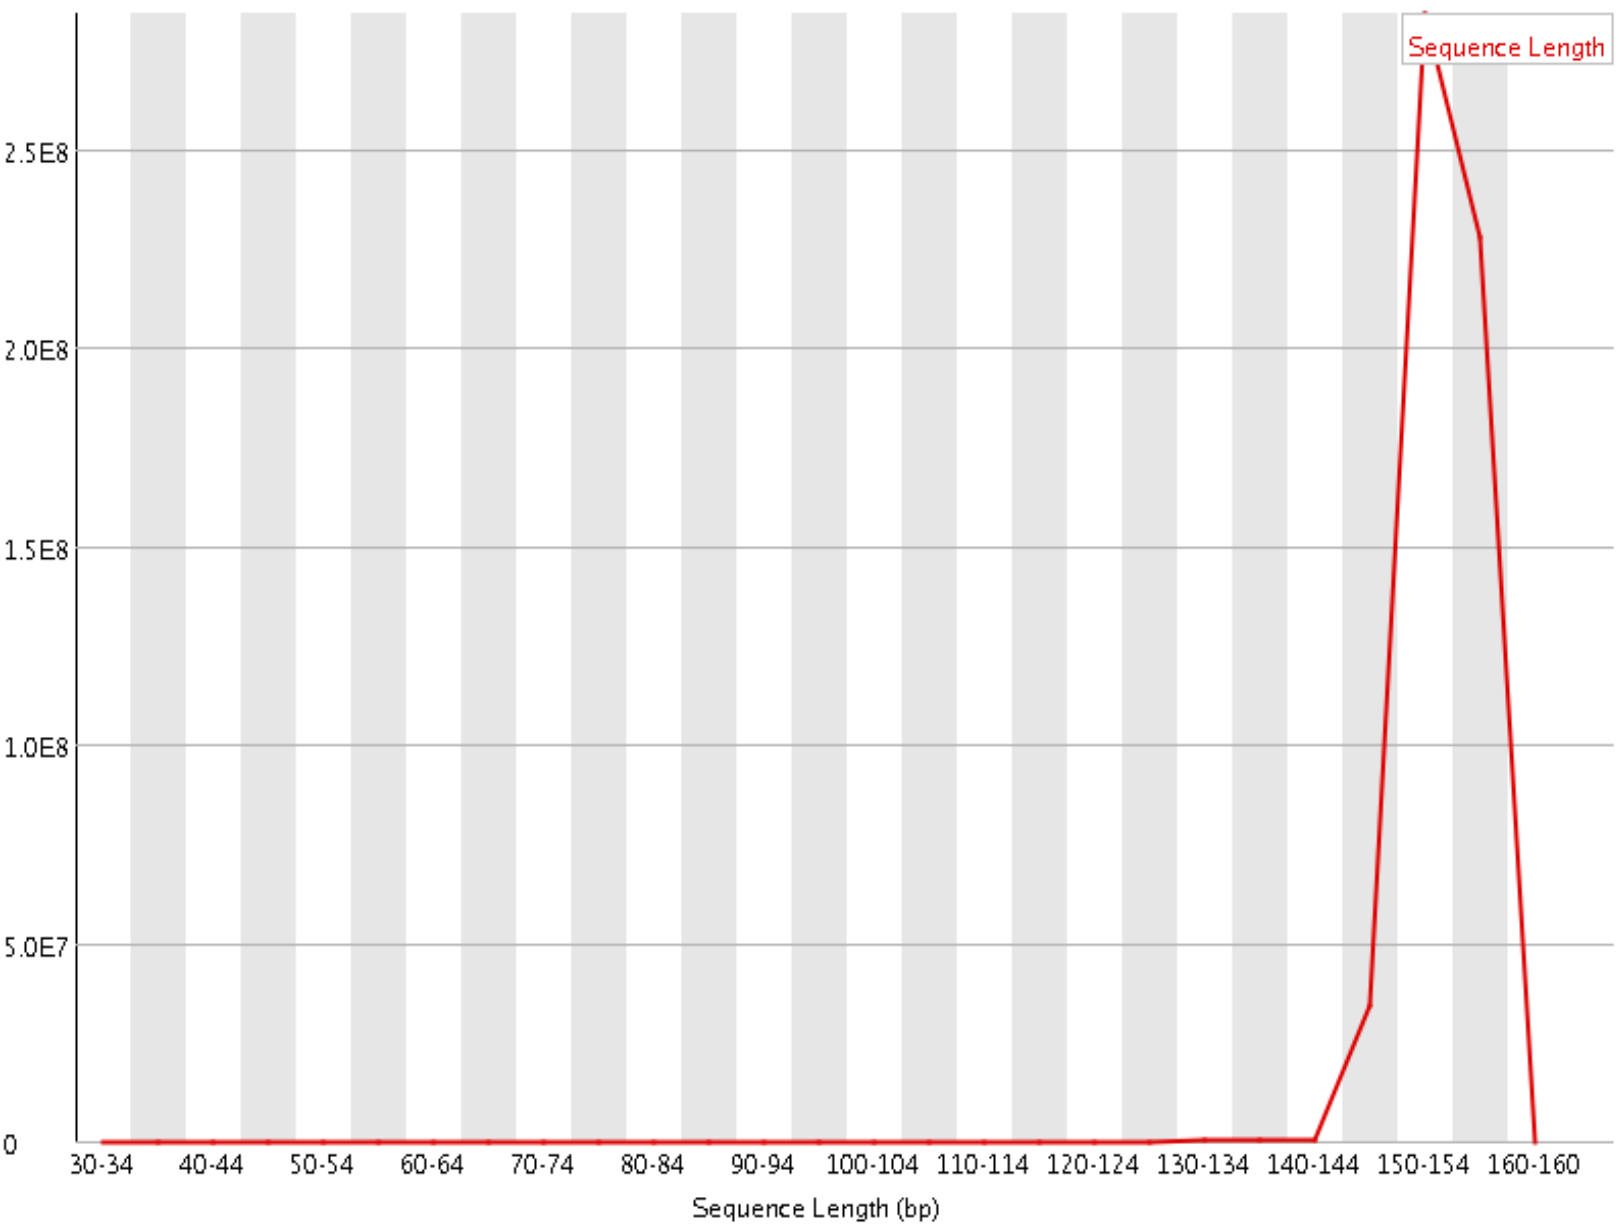

## ! Sequence Duplication Levels



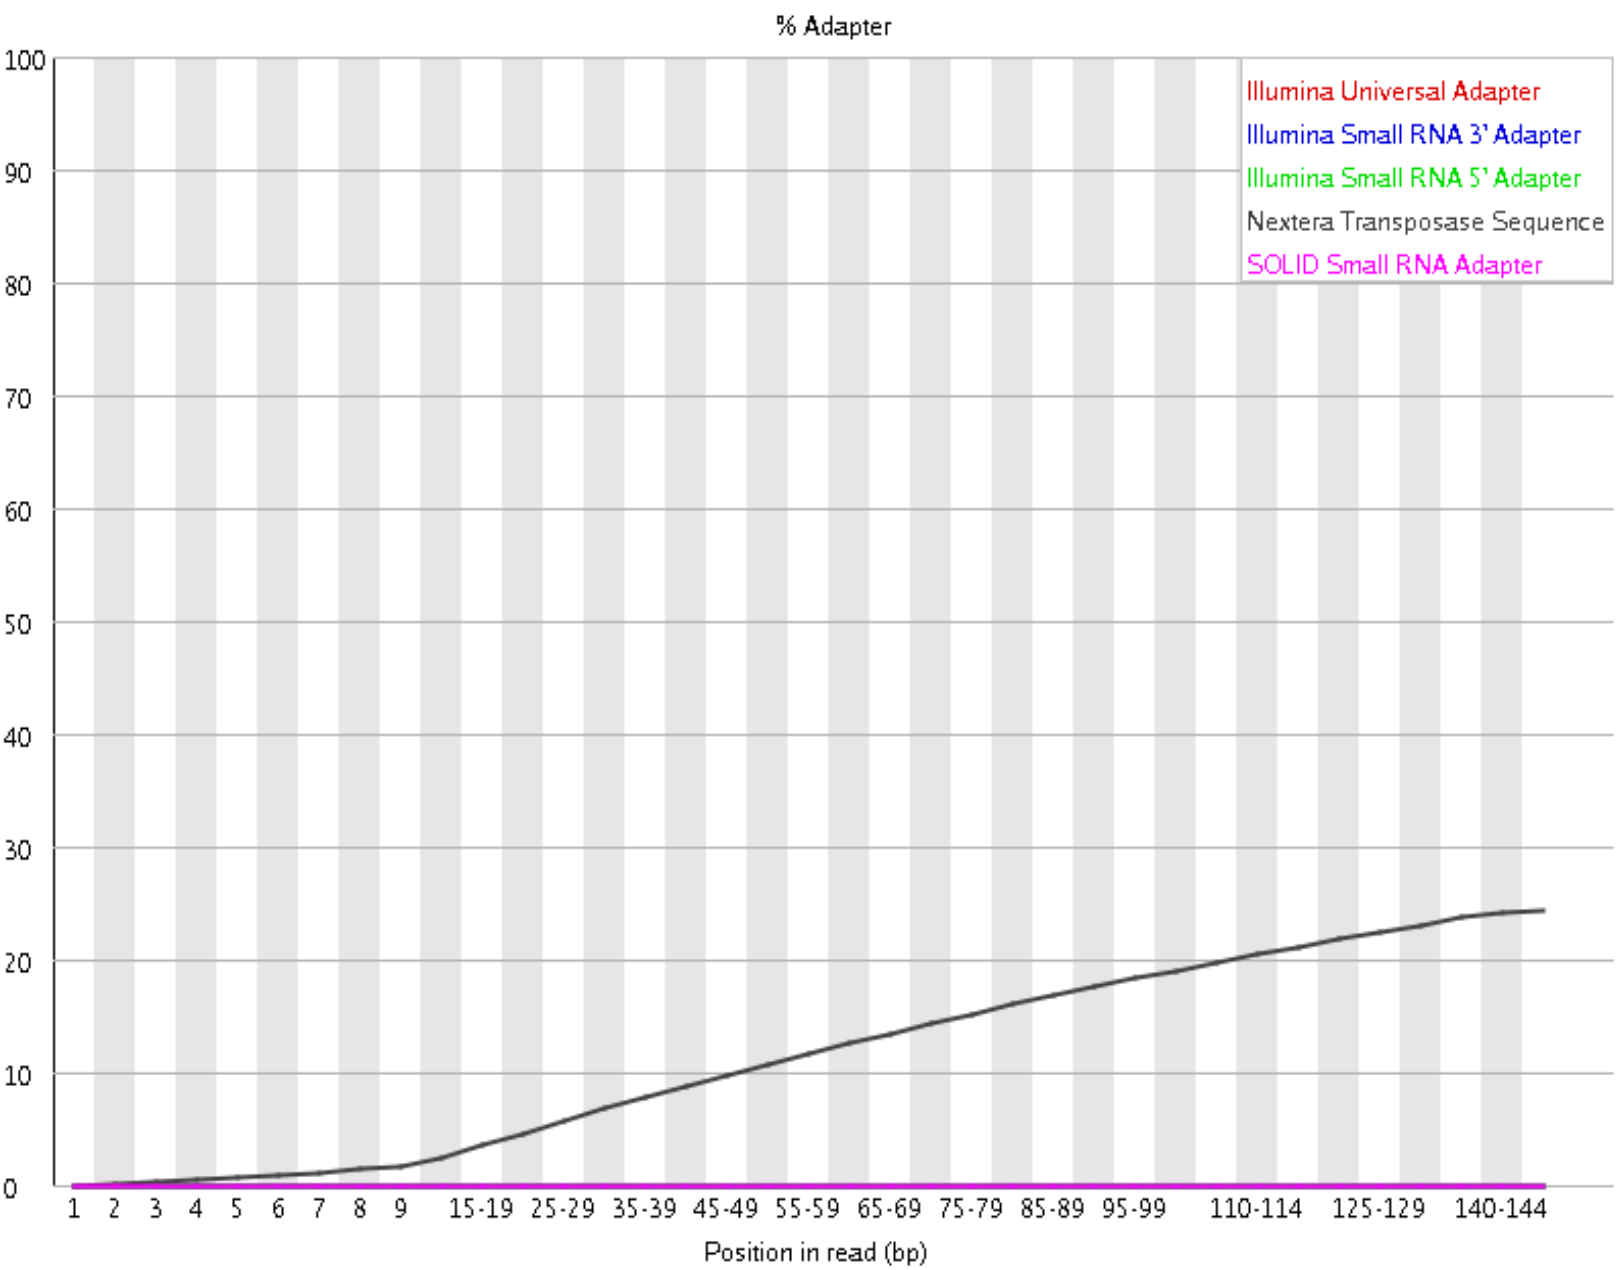

Produced by [FastQC](#) (version 0.11.7)

## Summary

-  [Basic Statistics](#)
-  [Per base sequence quality](#)
-  [Per tile sequence quality](#)
-  [Per sequence quality scores](#)
-  [Per base sequence content](#)
-  [Per sequence GC content](#)
-  [Per base N content](#)
-  [Sequence Length Distribution](#)
-  [Sequence Duplication Levels](#)
-  [Overrepresented sequences](#)
-  [Adapter Content](#)

## Basic Statistics

| Measure                           | Value                   |
|-----------------------------------|-------------------------|
| Filename                          | stdin                   |
| File type                         | Conventional base calls |
| Encoding                          | Sanger / Illumina 1.9   |
| Total Sequences                   | 338626576               |
| Sequences flagged as poor quality | 0                       |
| Sequence length                   | 35-156                  |
| %GC                               | 43                      |

## Per base sequence quality

Quality scores across all bases (Sanger /Illumina 1.9 encoding)

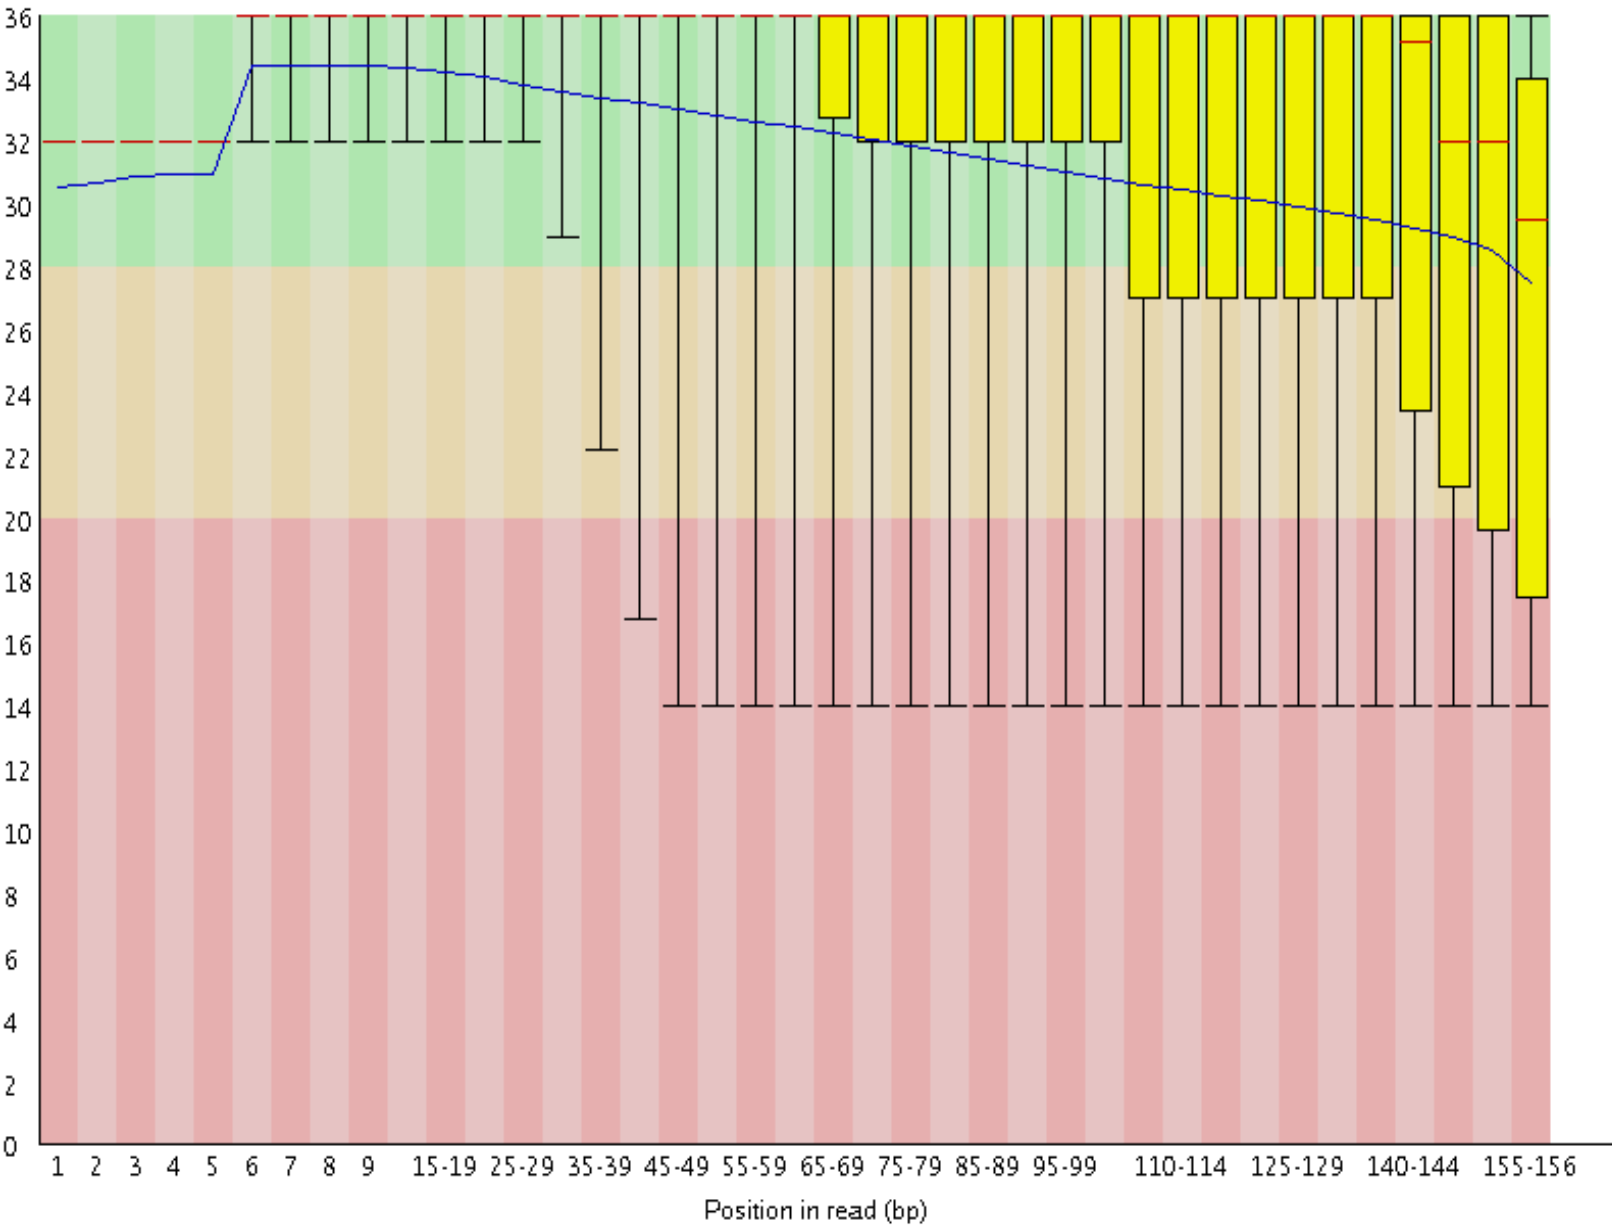

❌ Per tile sequence quality

Quality per tile

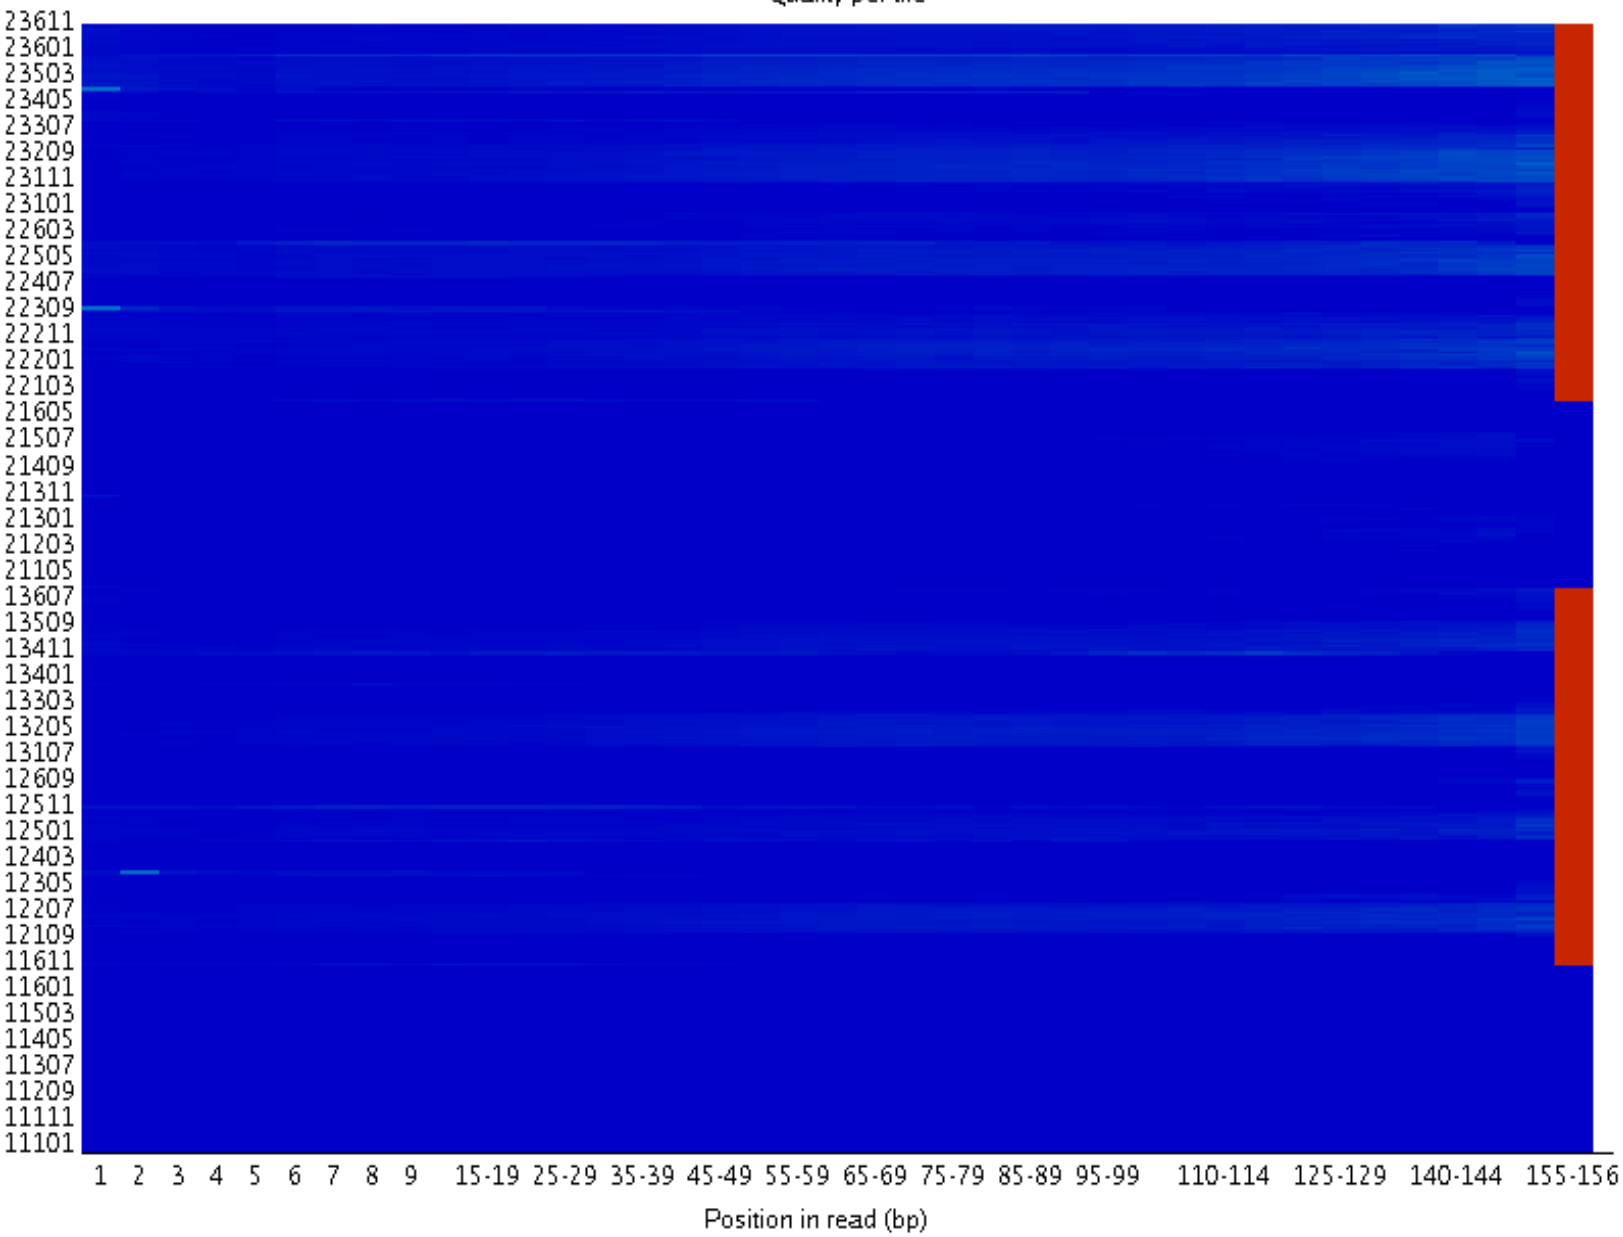

 **Per sequence quality scores**

Quality score distribution over all sequences

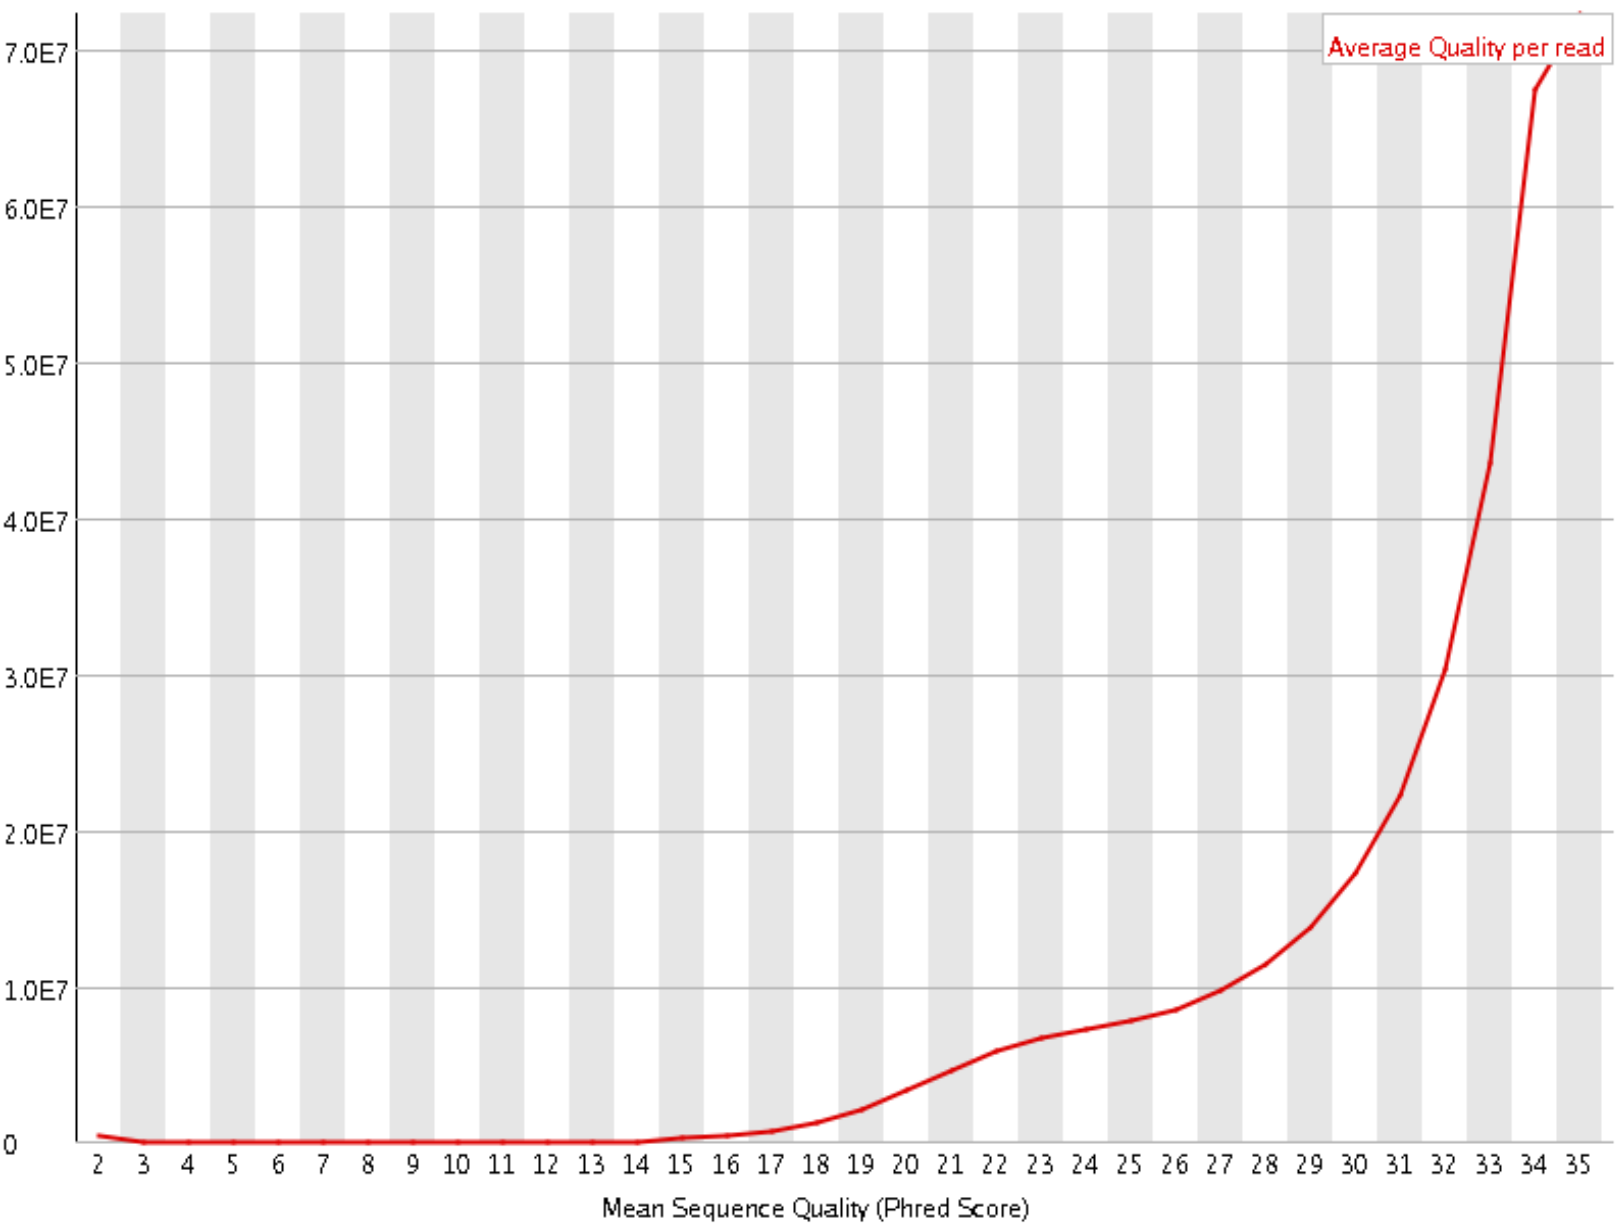

 **Per base sequence content**

Sequence content across all bases

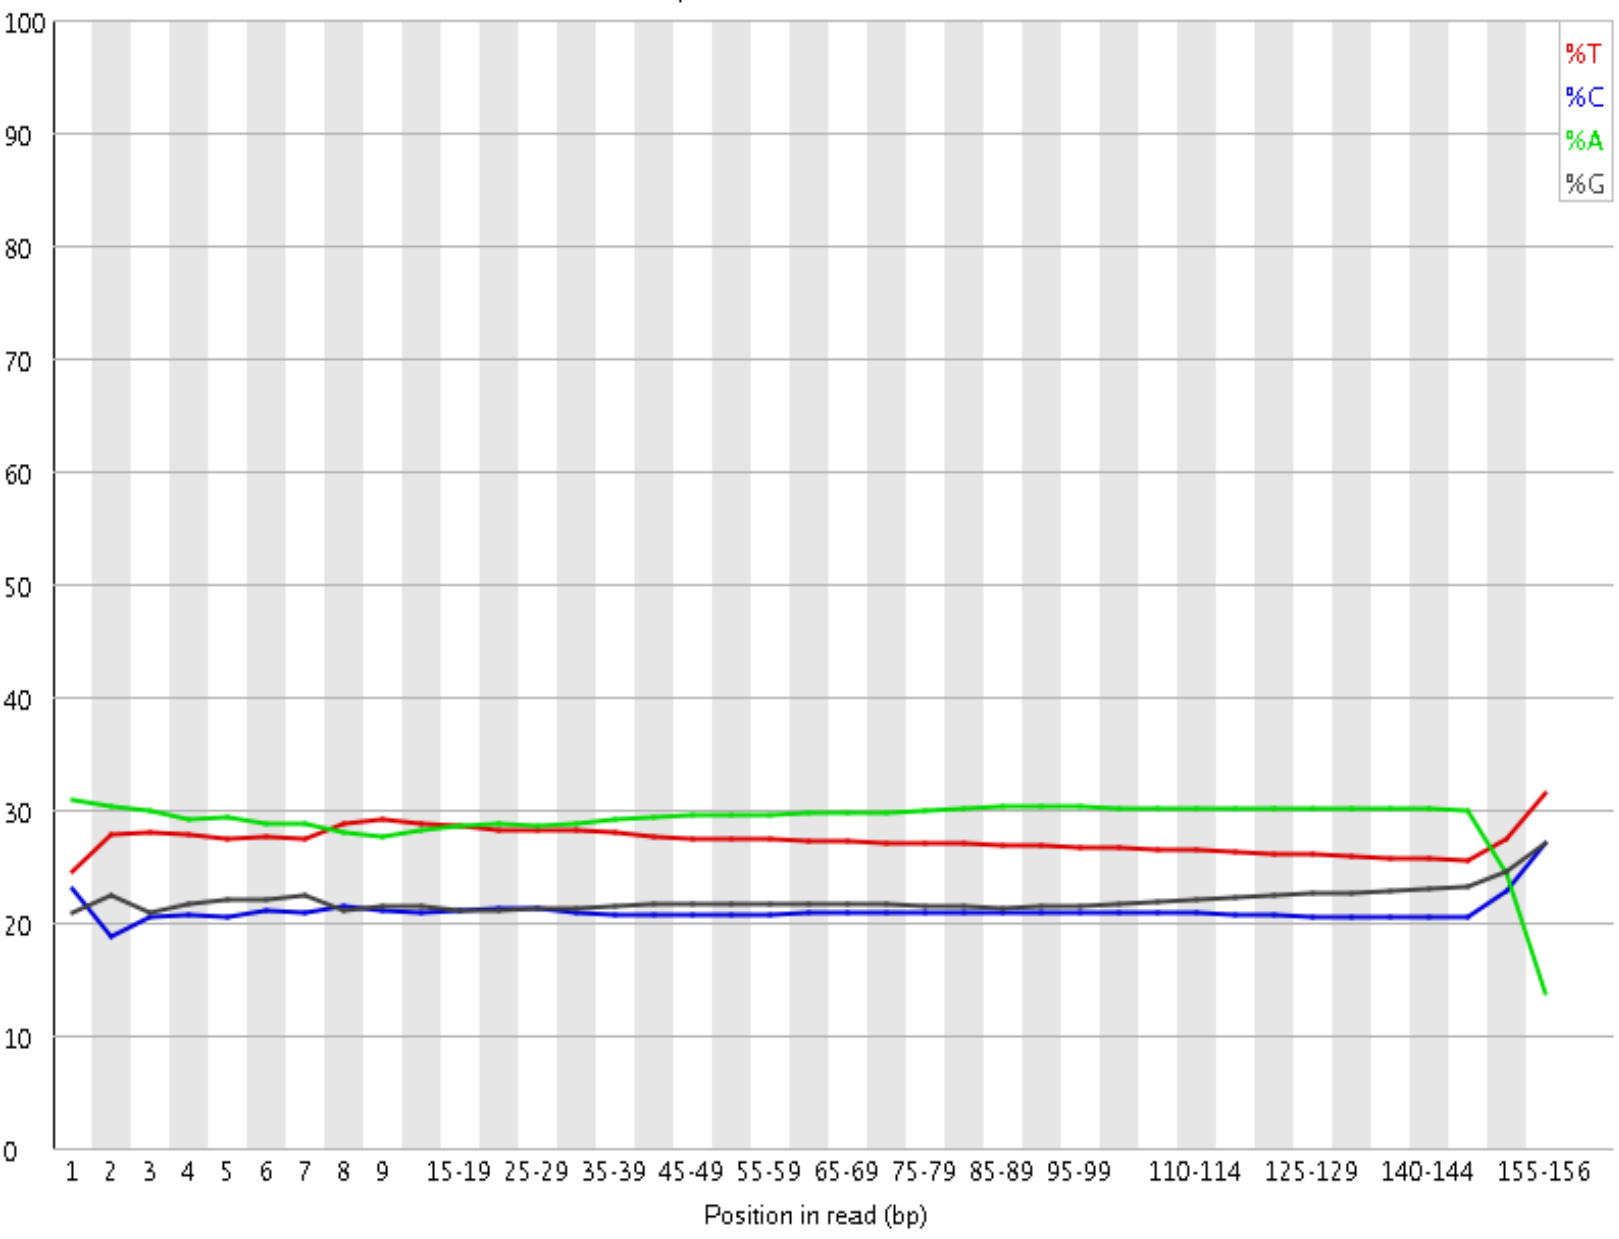

⚠ Per sequence GC content



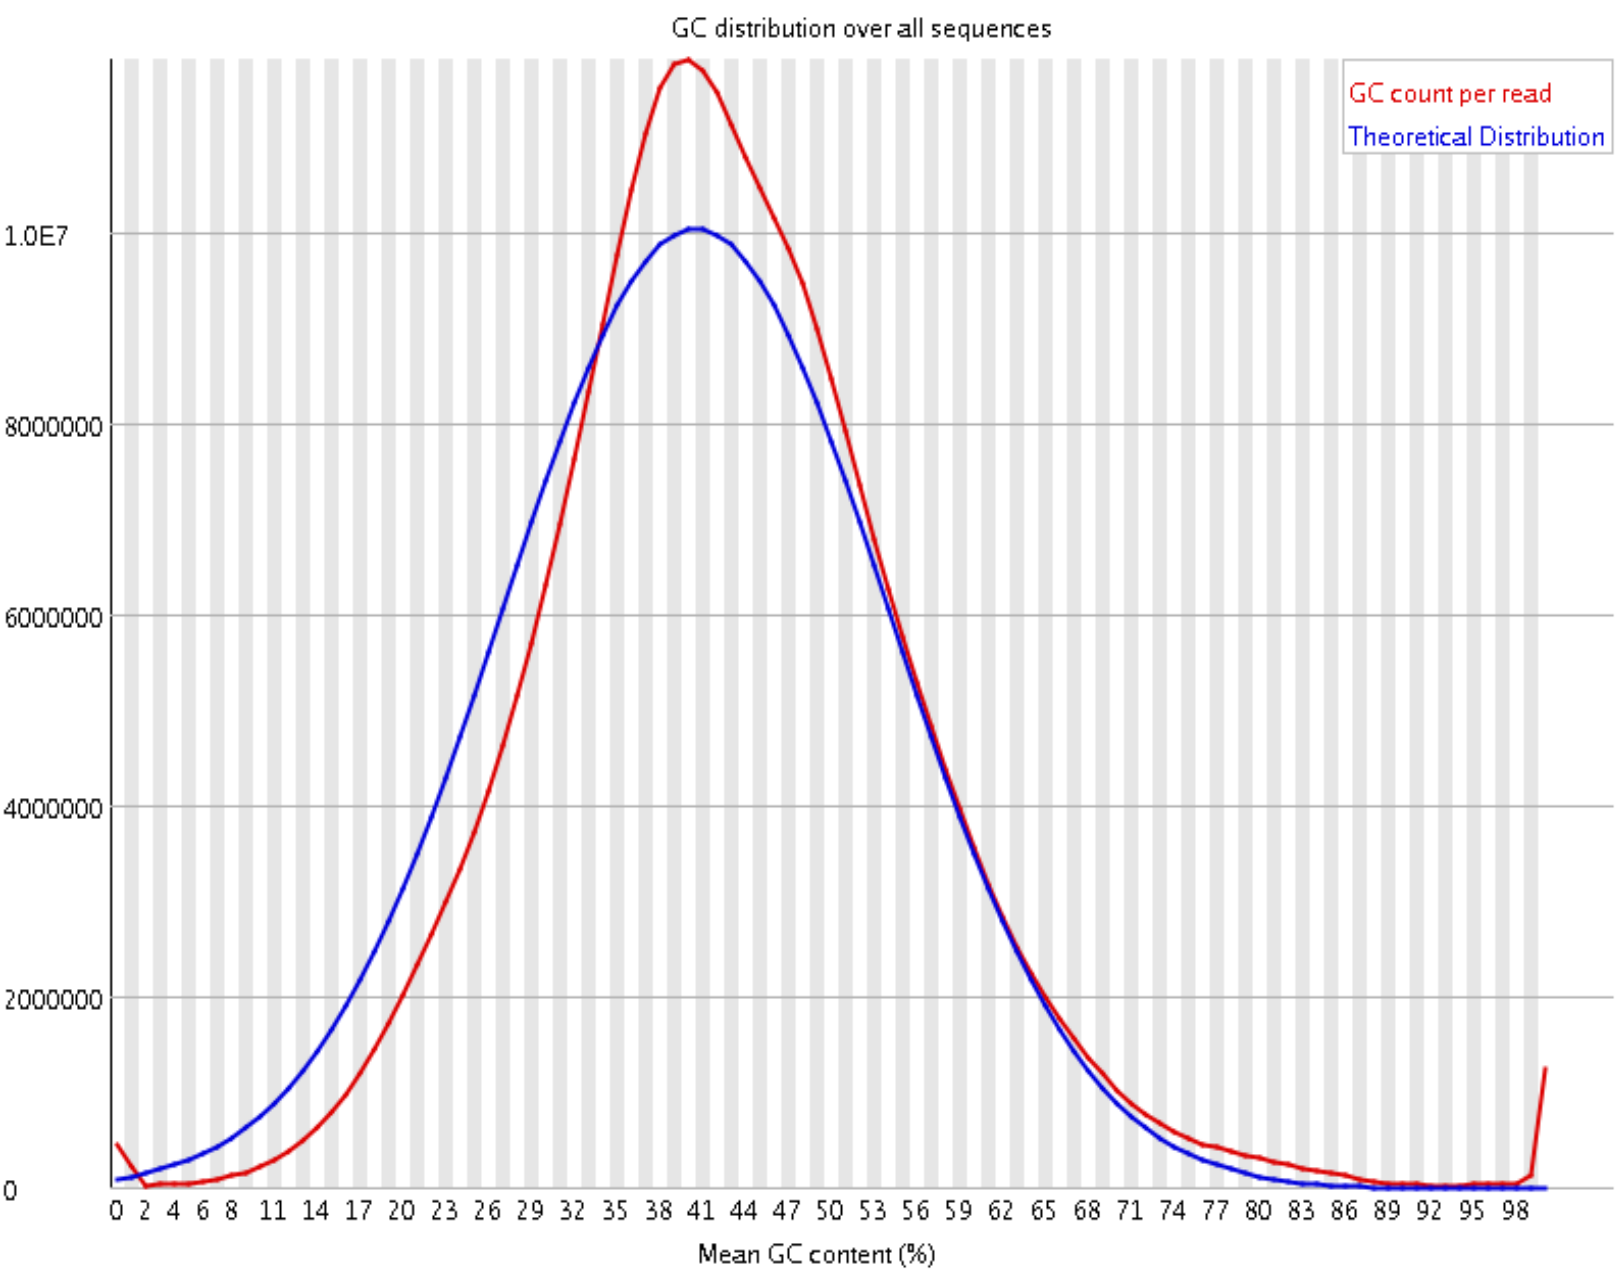

✔ Per base N content

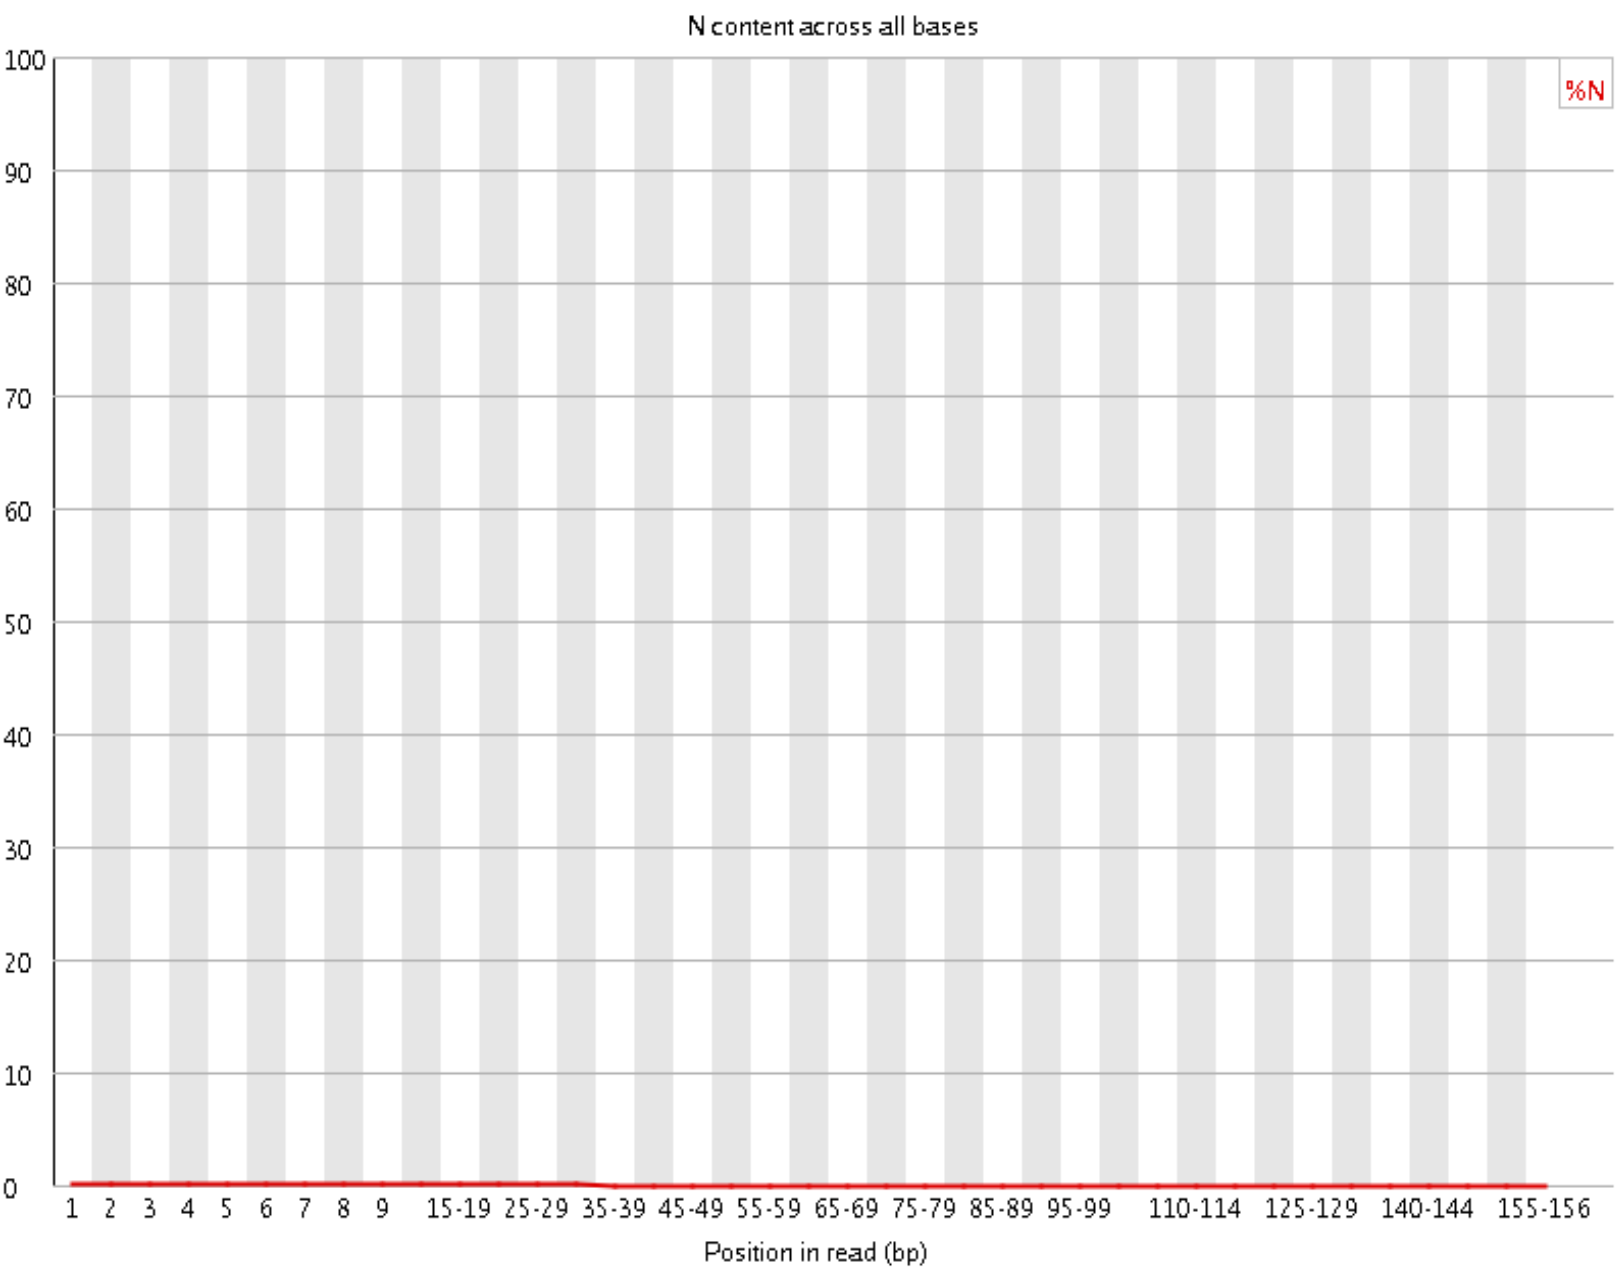

## Sequence Length Distribution

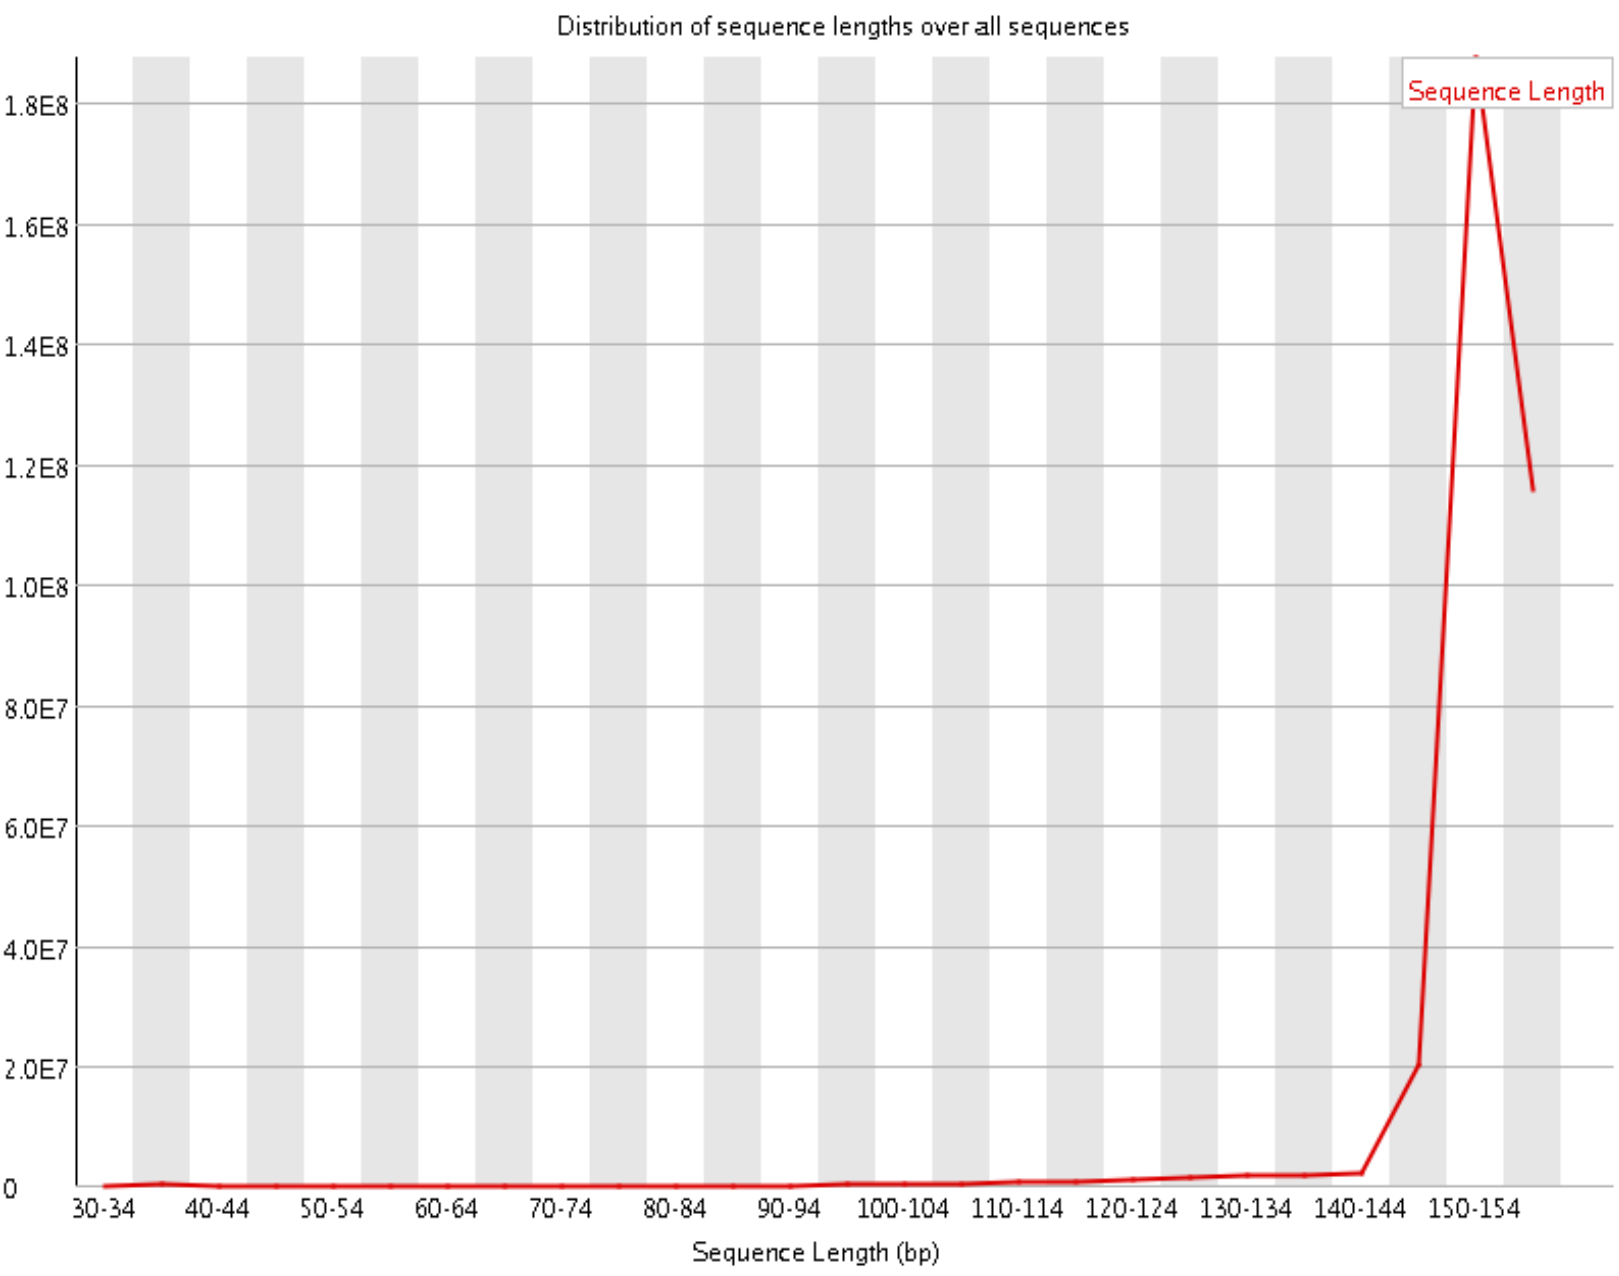

## 🚨 Sequence Duplication Levels



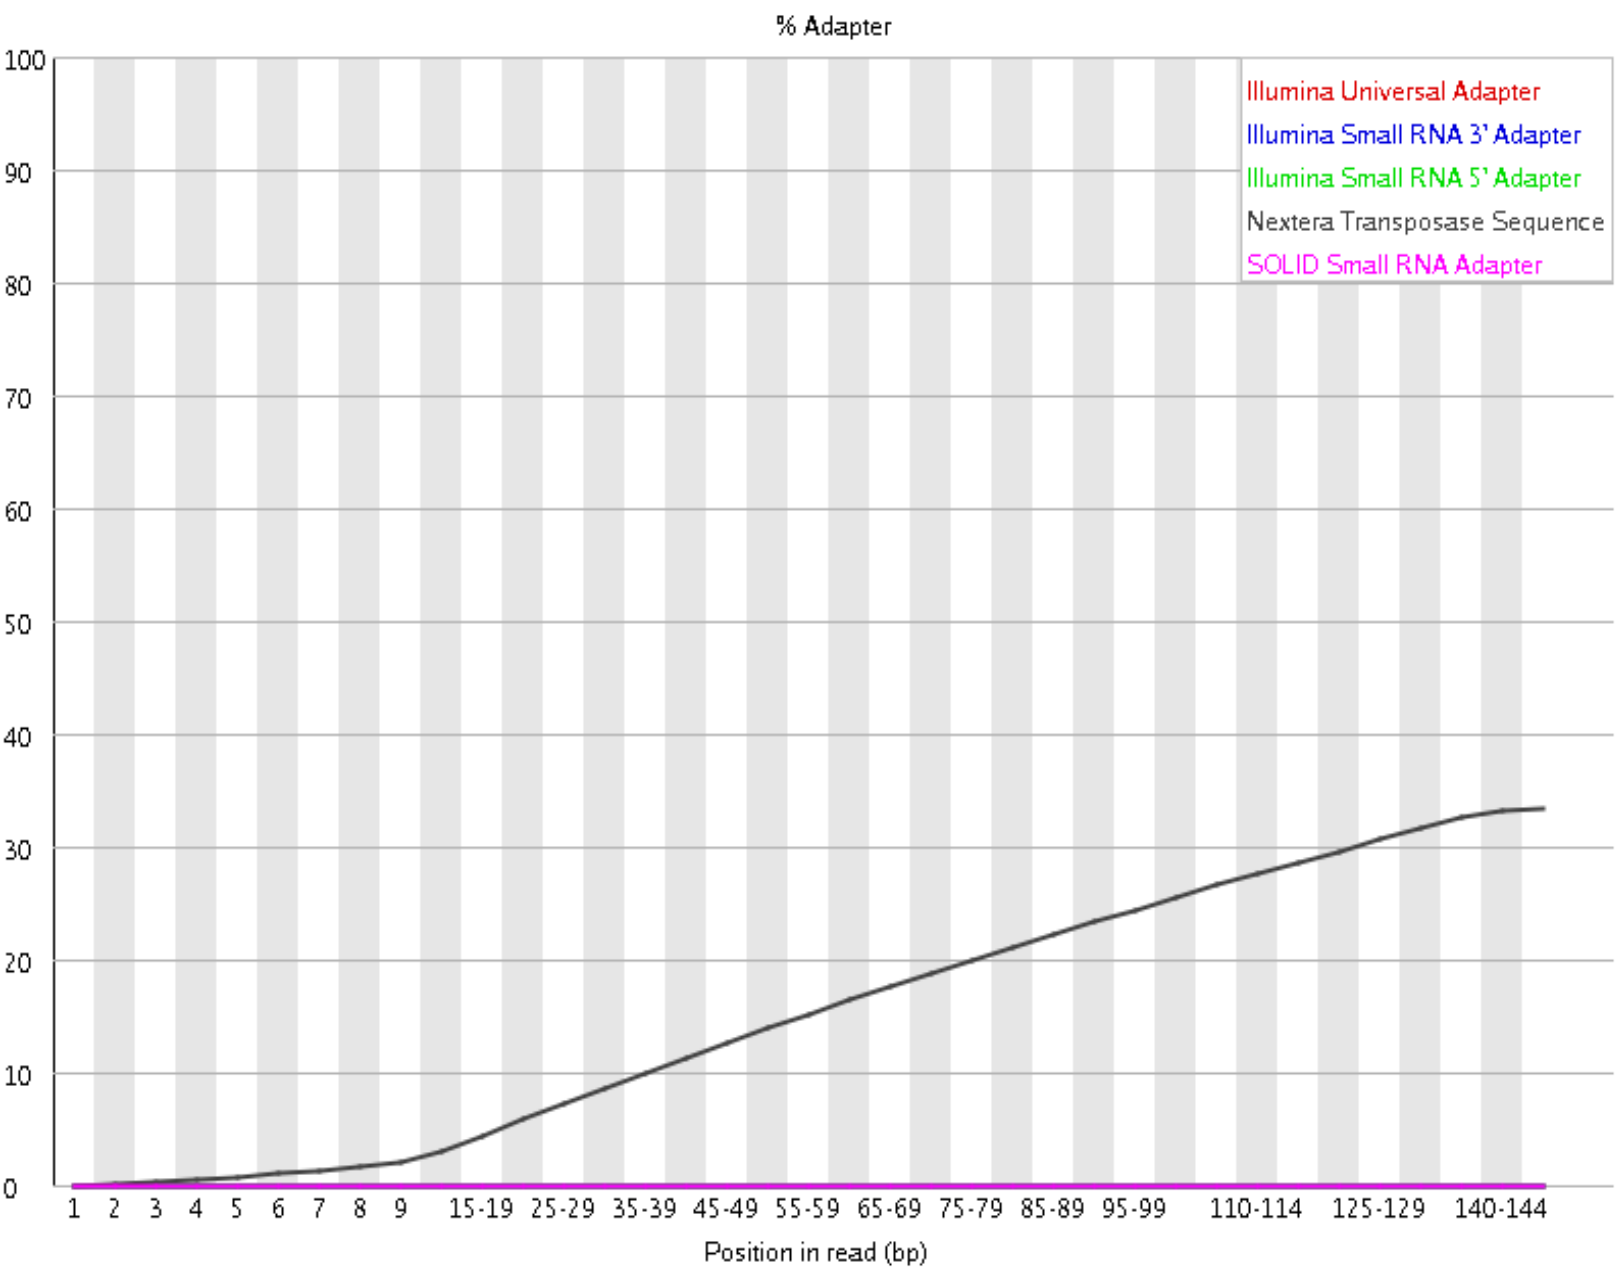

## Summary

-  [Basic Statistics](#)
-  [Per base sequence quality](#)
-  [Per tile sequence quality](#)
-  [Per sequence quality scores](#)
-  [Per base sequence content](#)
-  [Per sequence GC content](#)
-  [Per base N content](#)
-  [Sequence Length Distribution](#)
-  [Sequence Duplication Levels](#)
-  [Overrepresented sequences](#)
-  [Adapter Content](#)

## Basic Statistics

| Measure                           | Value                   |
|-----------------------------------|-------------------------|
| Filename                          | stdin                   |
| File type                         | Conventional base calls |
| Encoding                          | Sanger / Illumina 1.9   |
| Total Sequences                   | 366199264               |
| Sequences flagged as poor quality | 0                       |
| Sequence length                   | 35-151                  |
| %GC                               | 40                      |

## Per base sequence quality

Quality scores across all bases (Sanger /Illumina 1.9 encoding)

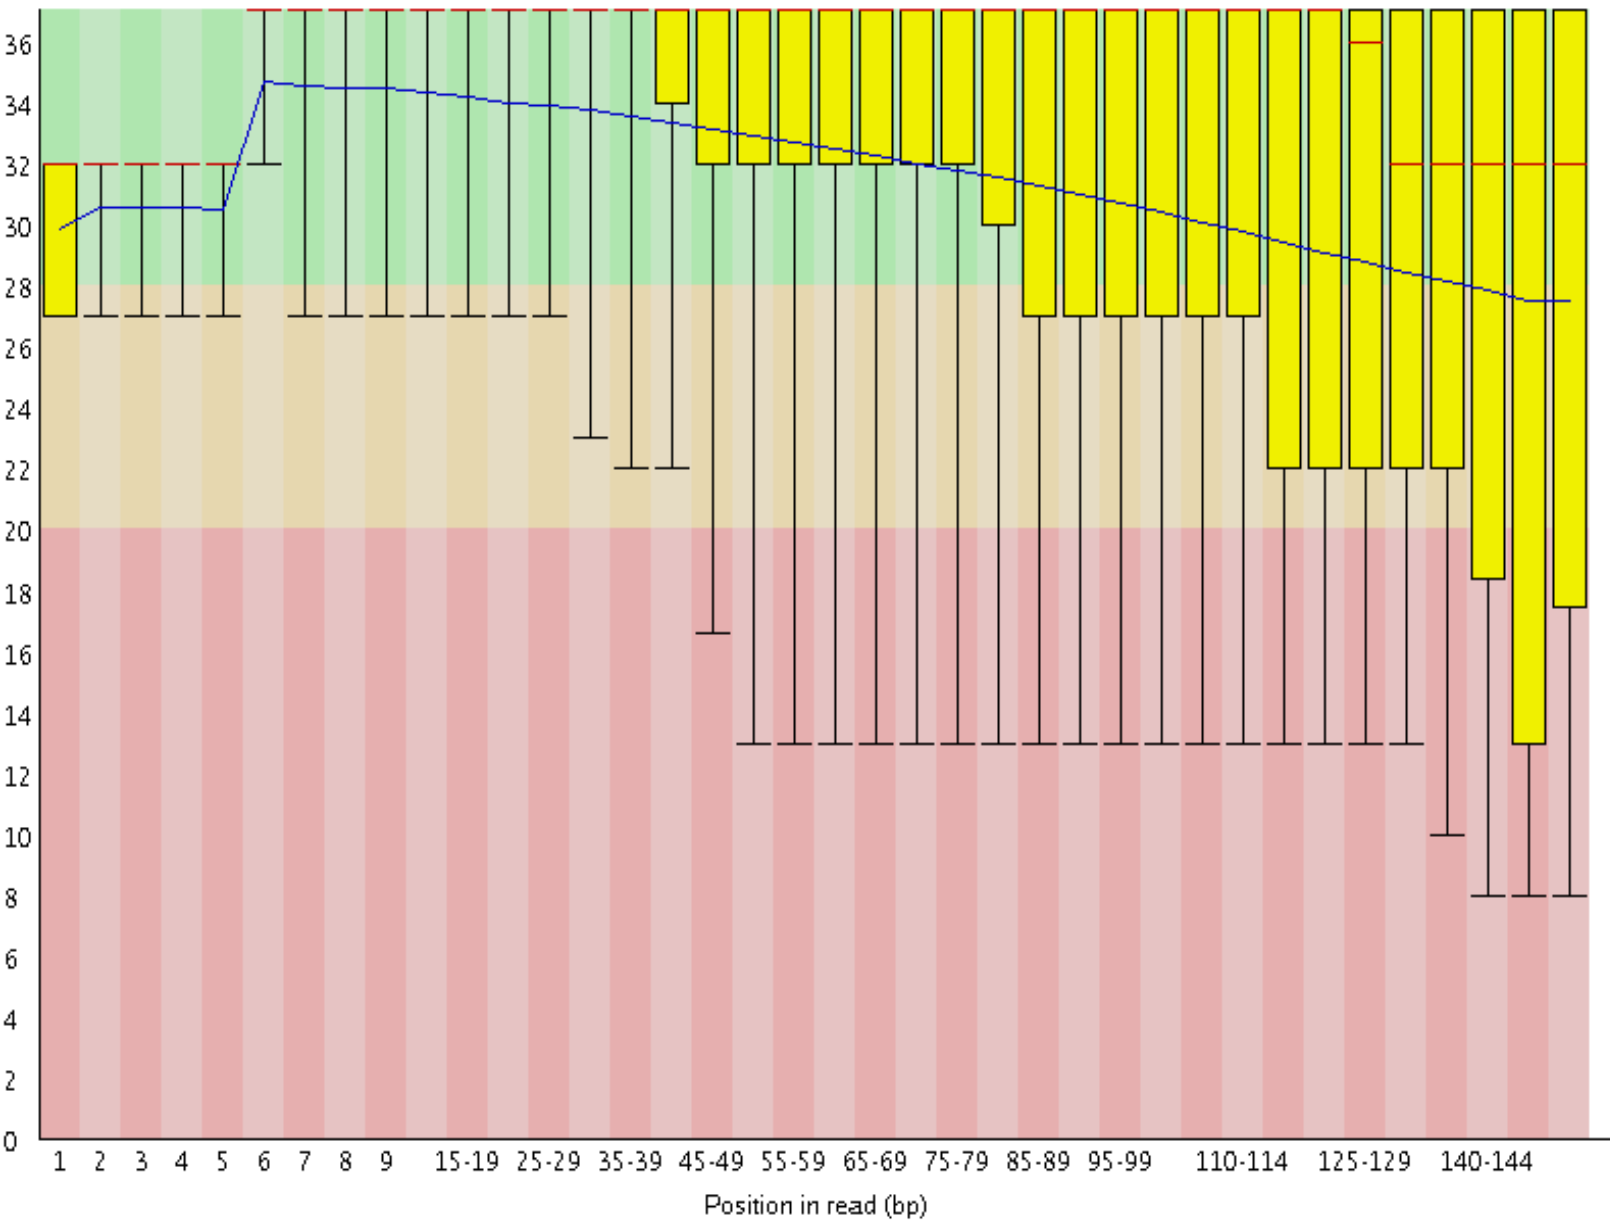

 **Per tile sequence quality**

Quality per tile

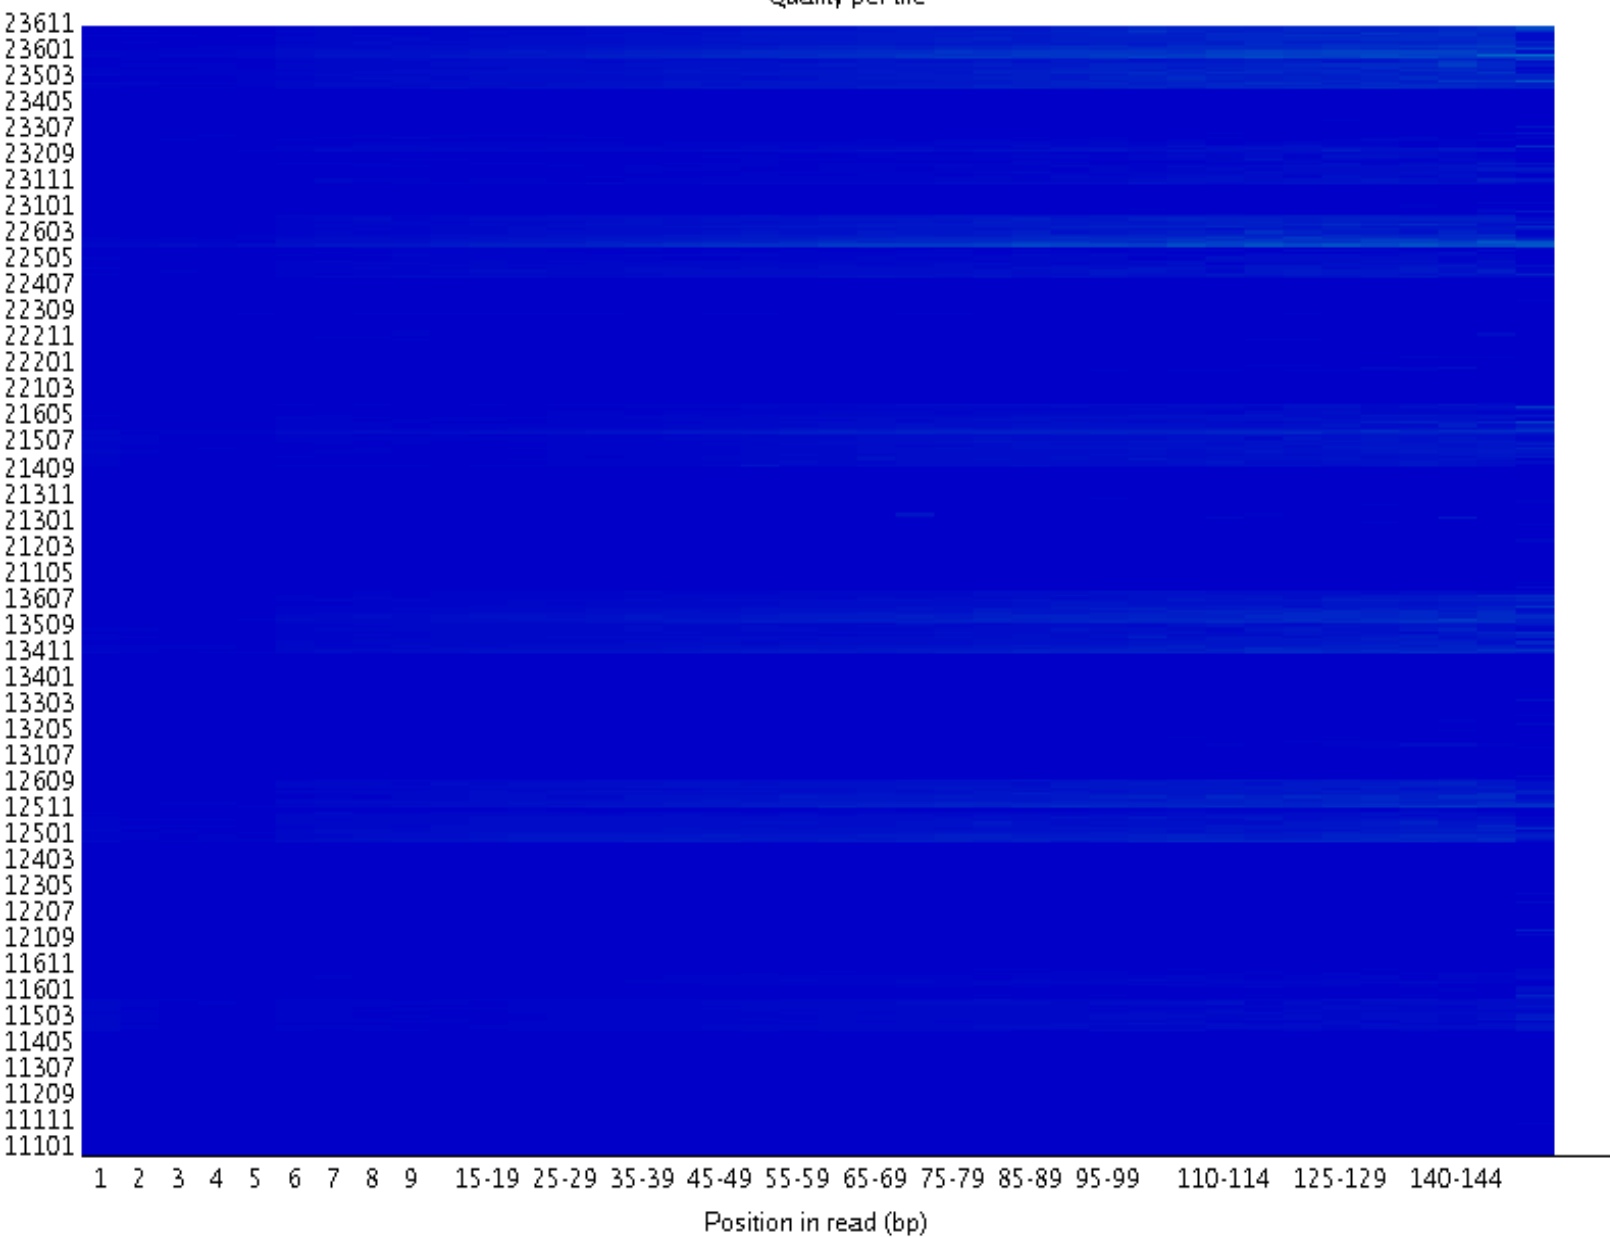

 **Per sequence quality scores**



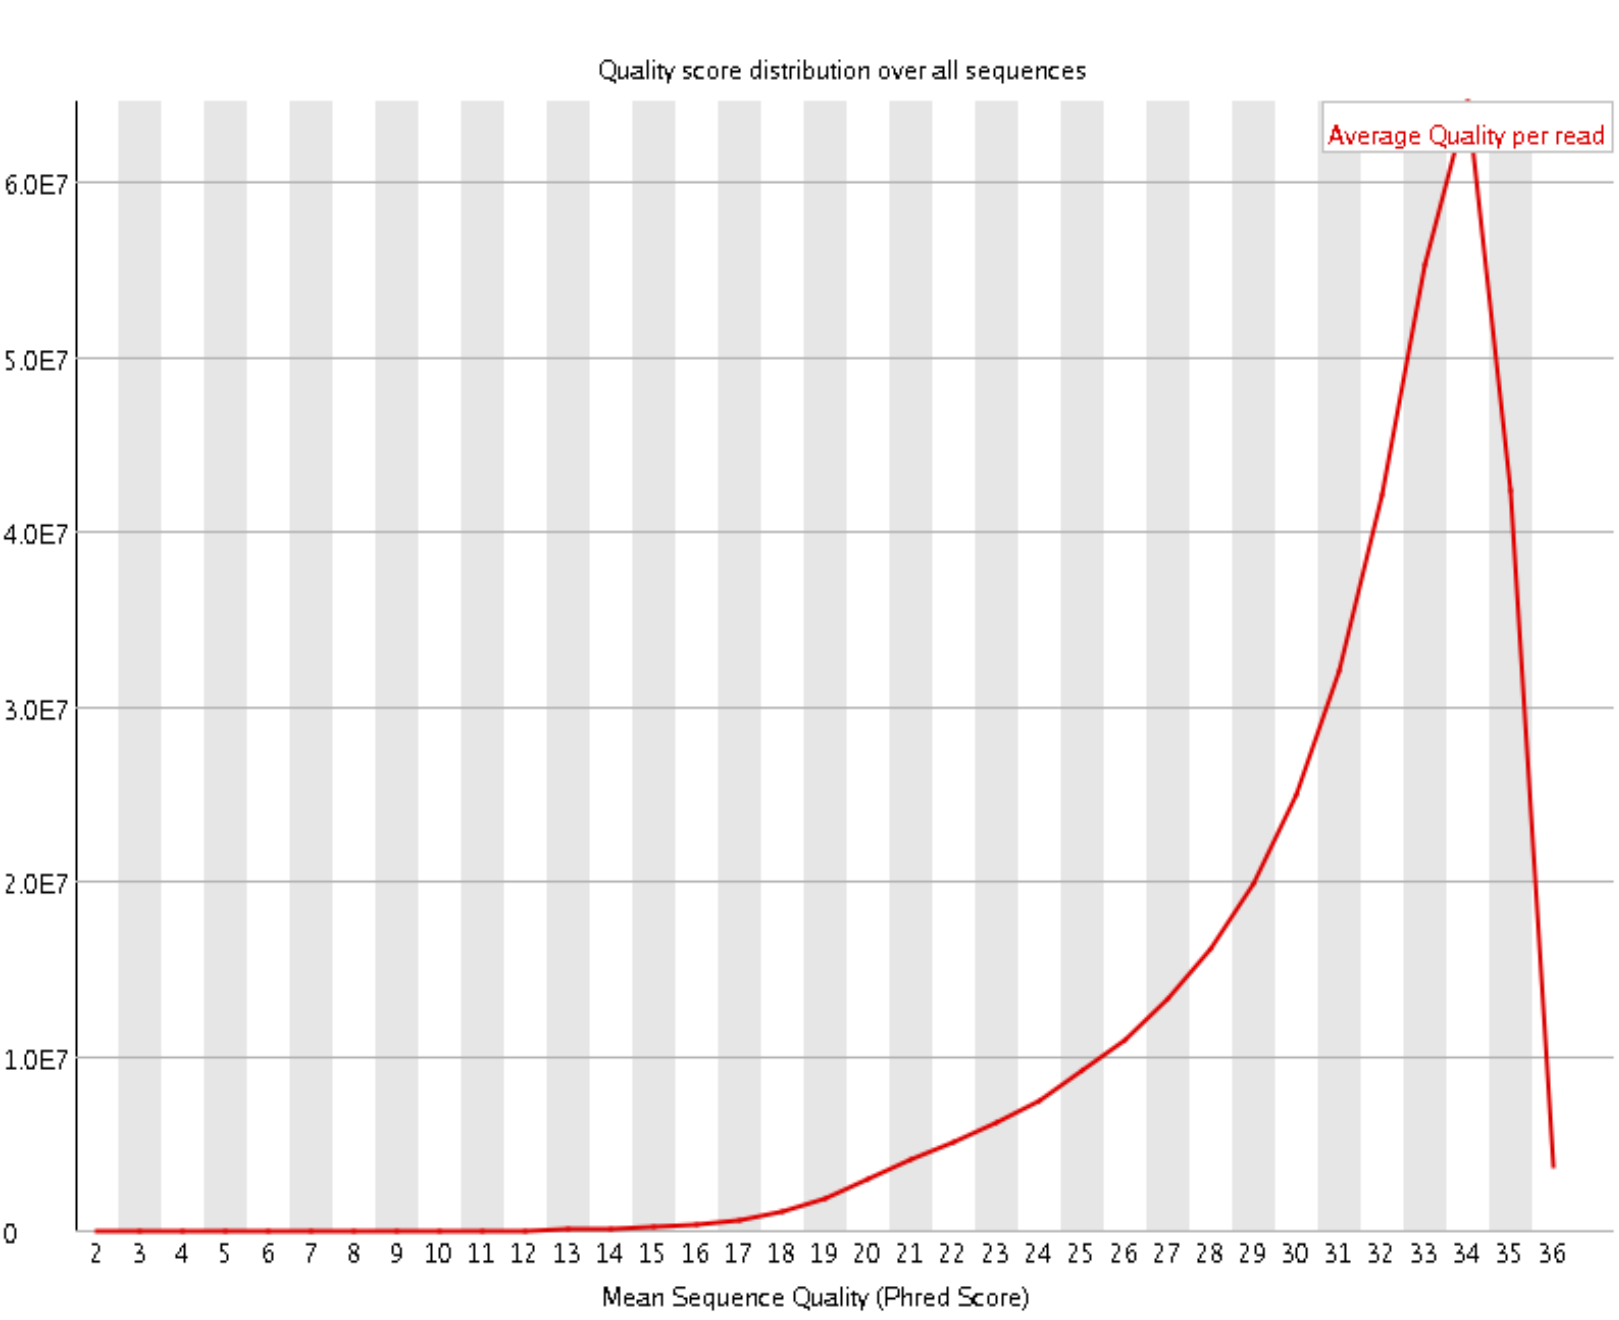

❌ Per base sequence content

Sequence content across all bases

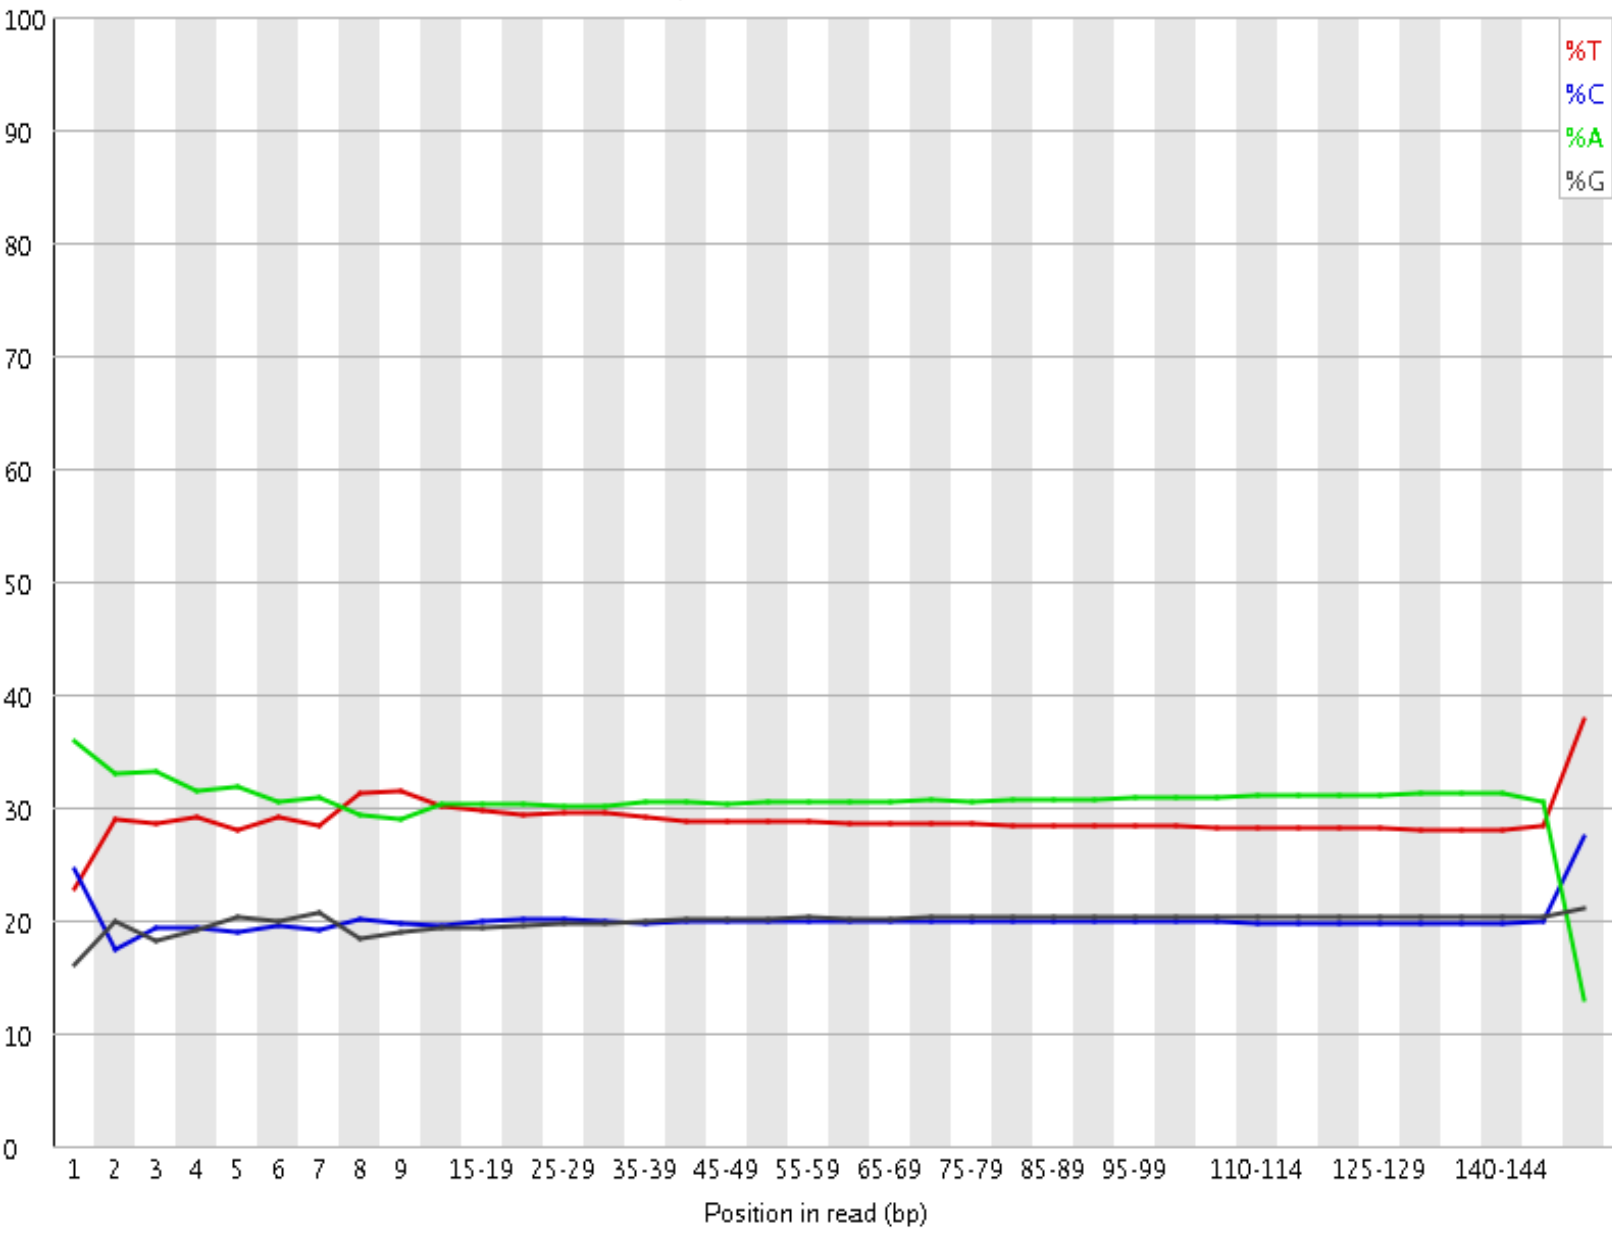

⚠ Per sequence GC content

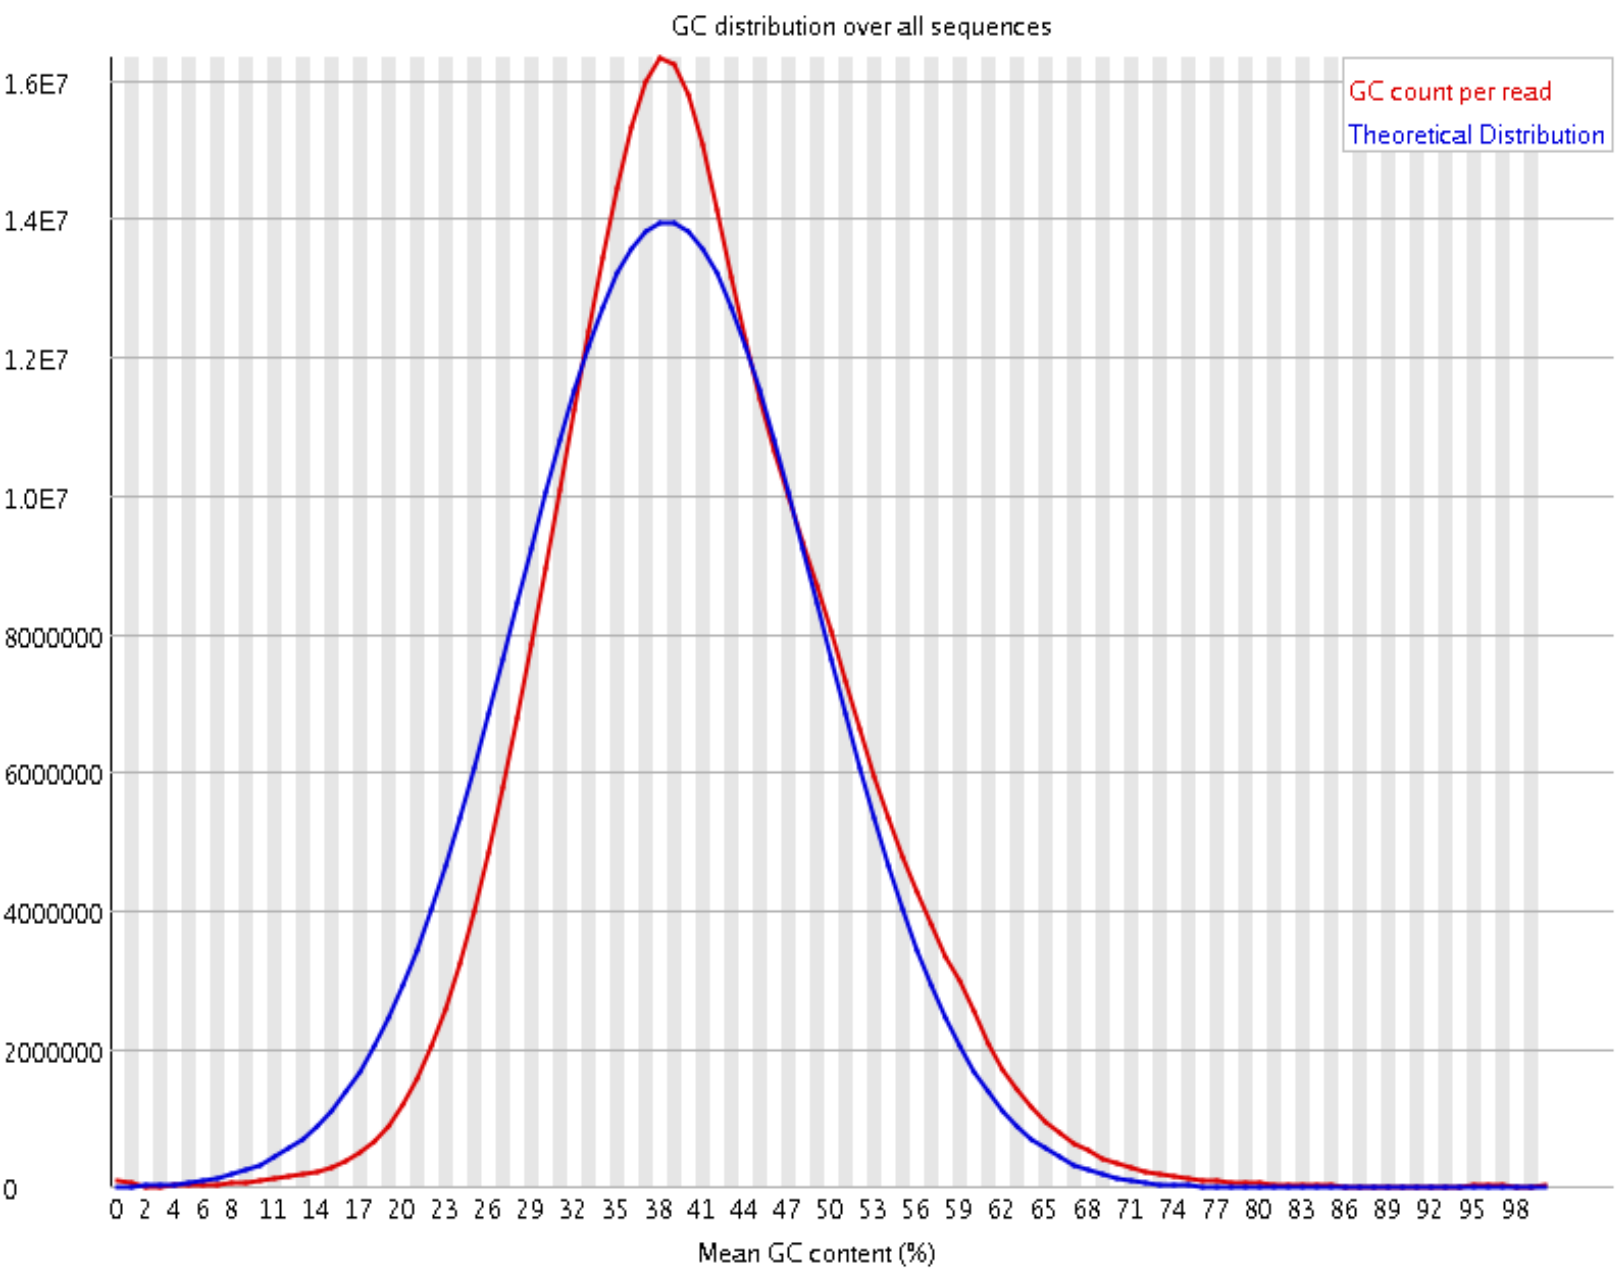

 **Per base N content**

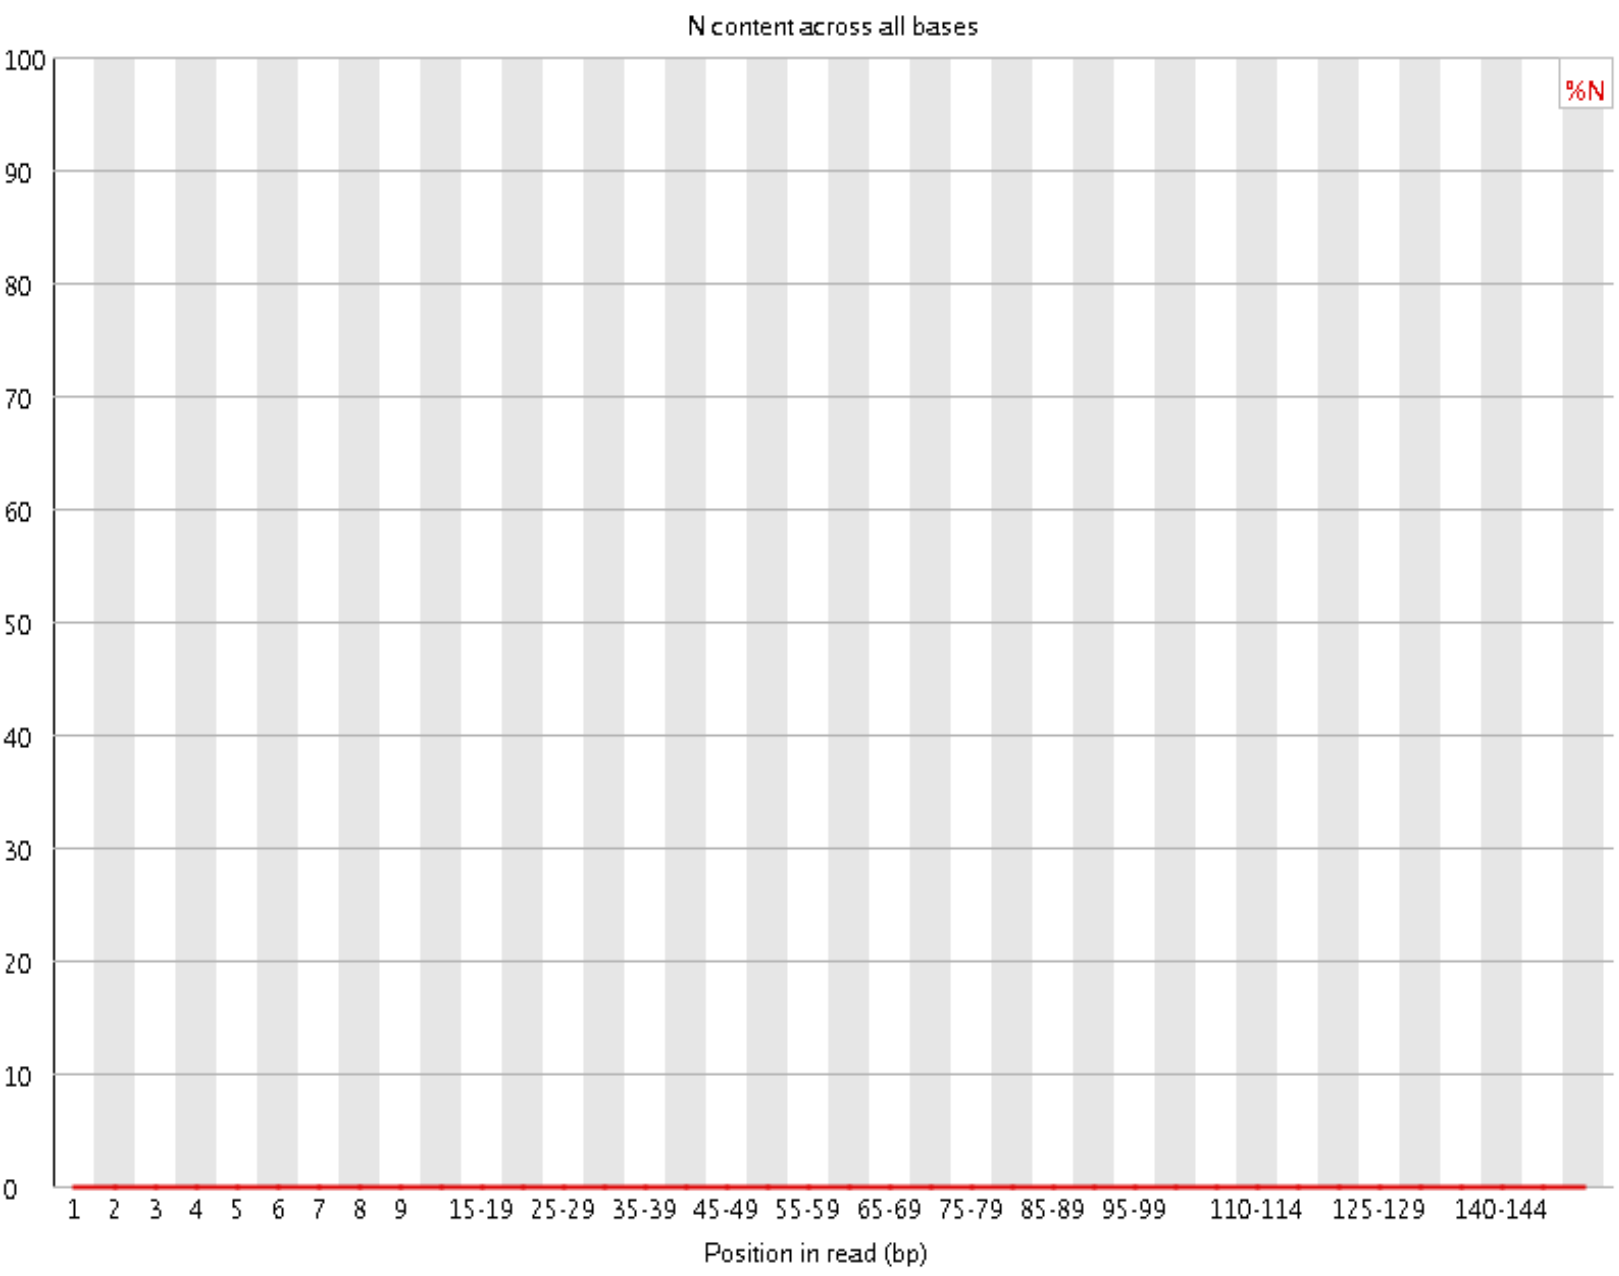

## Sequence Length Distribution

Distribution of sequence lengths over all sequences

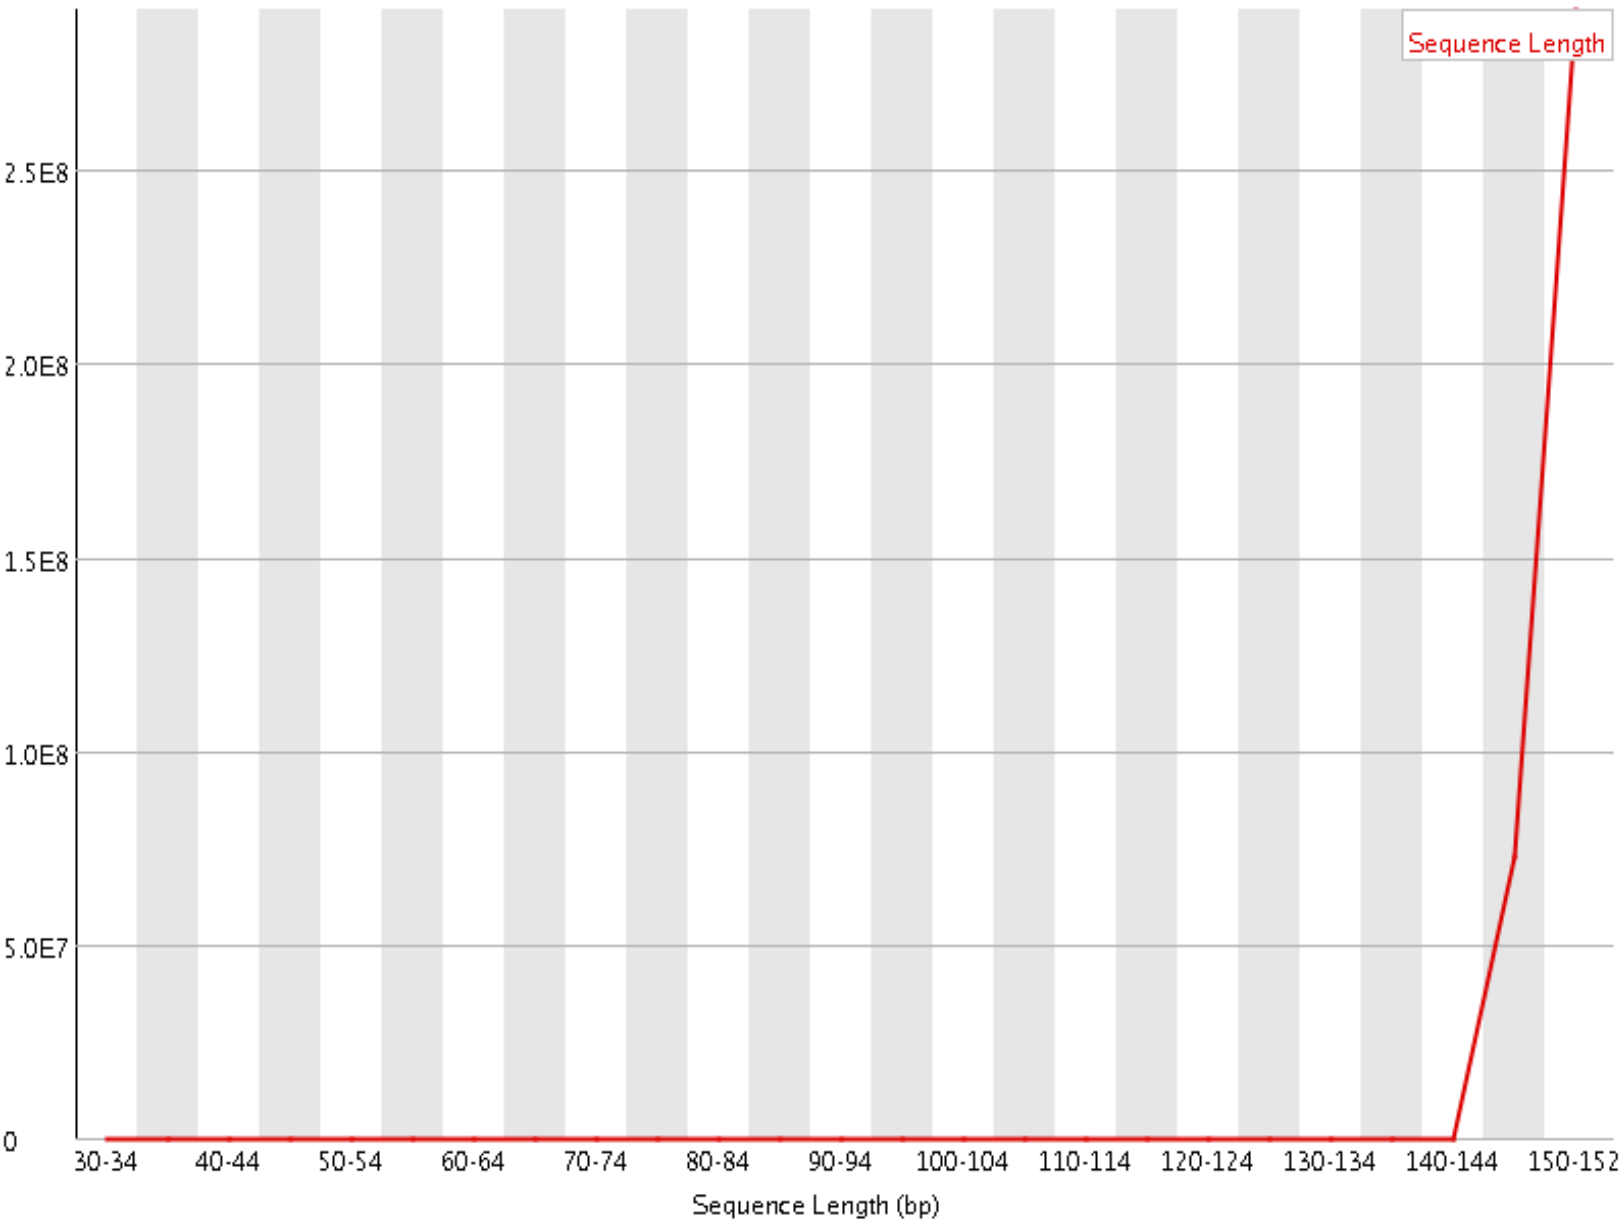

## ✖ Sequence Duplication Levels

Percent of seqs remaining if deduplicated 33.98%

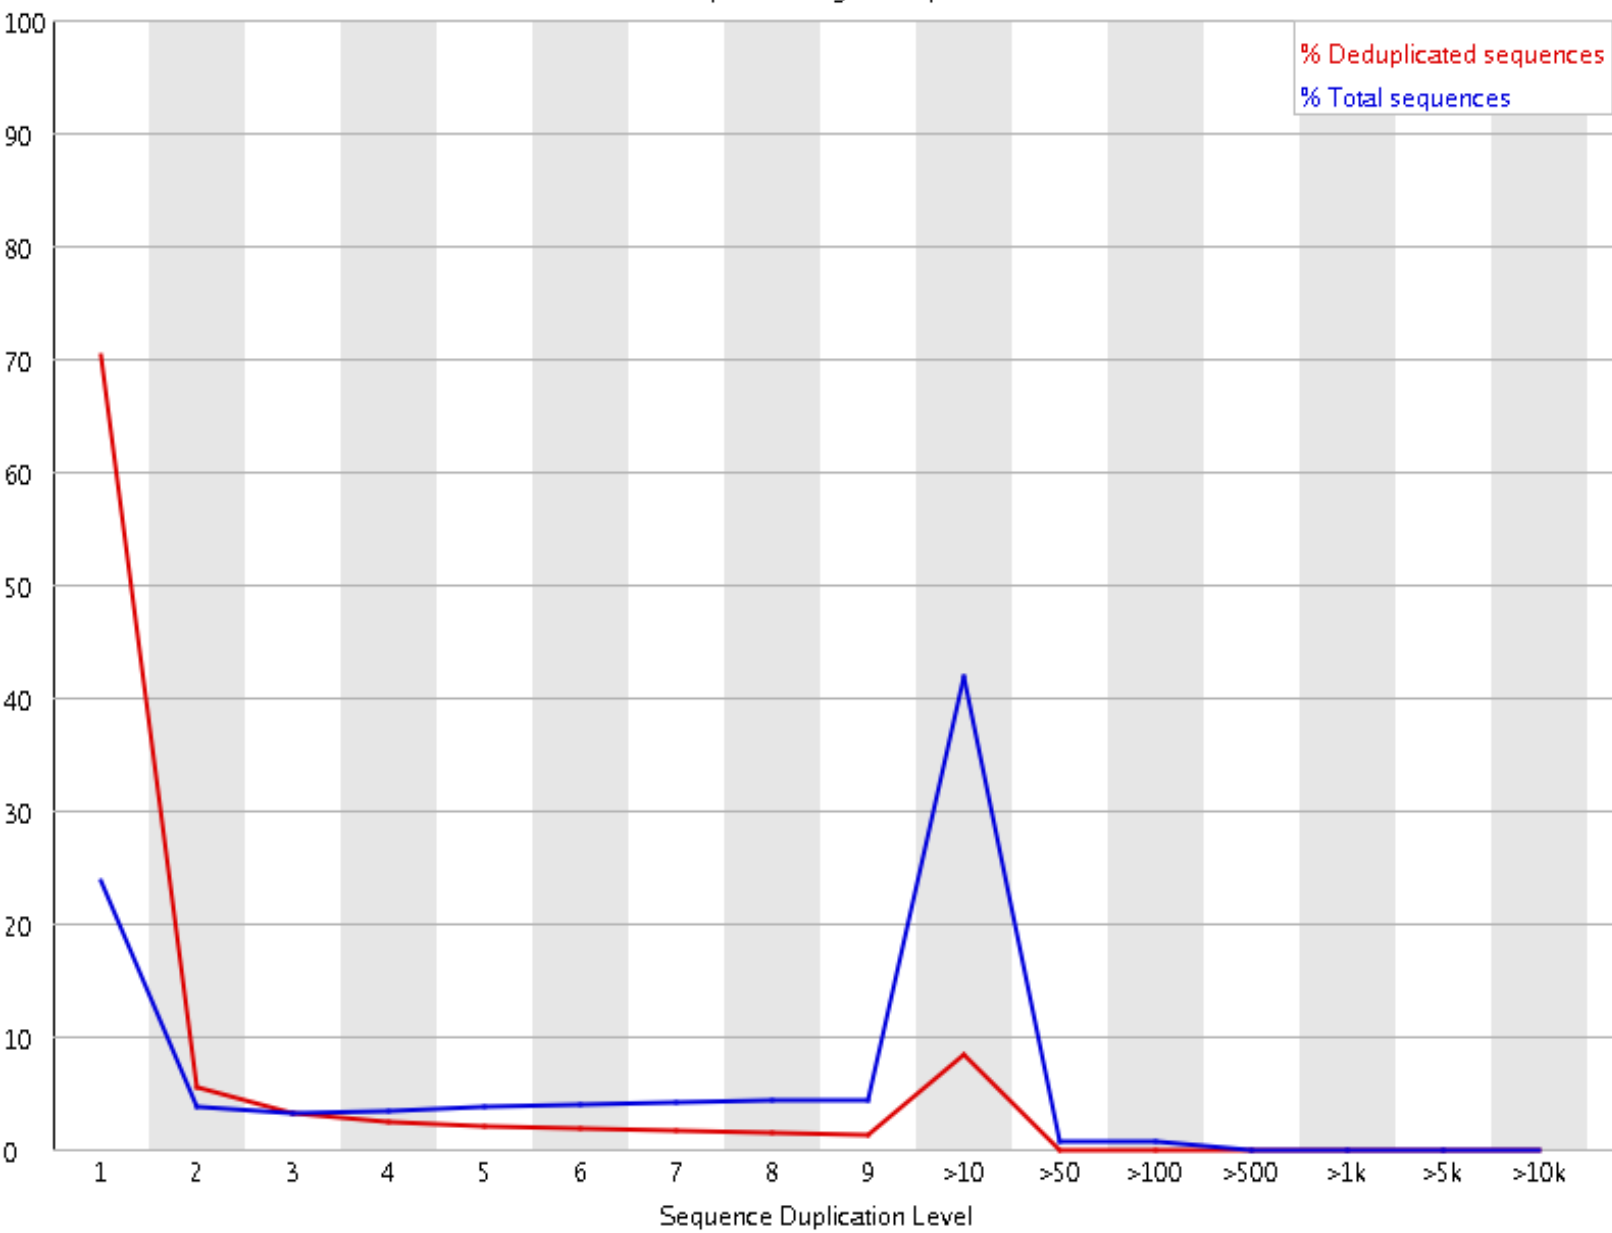

 **Overrepresented sequences**

No overrepresented sequences

 **Adapter Content**

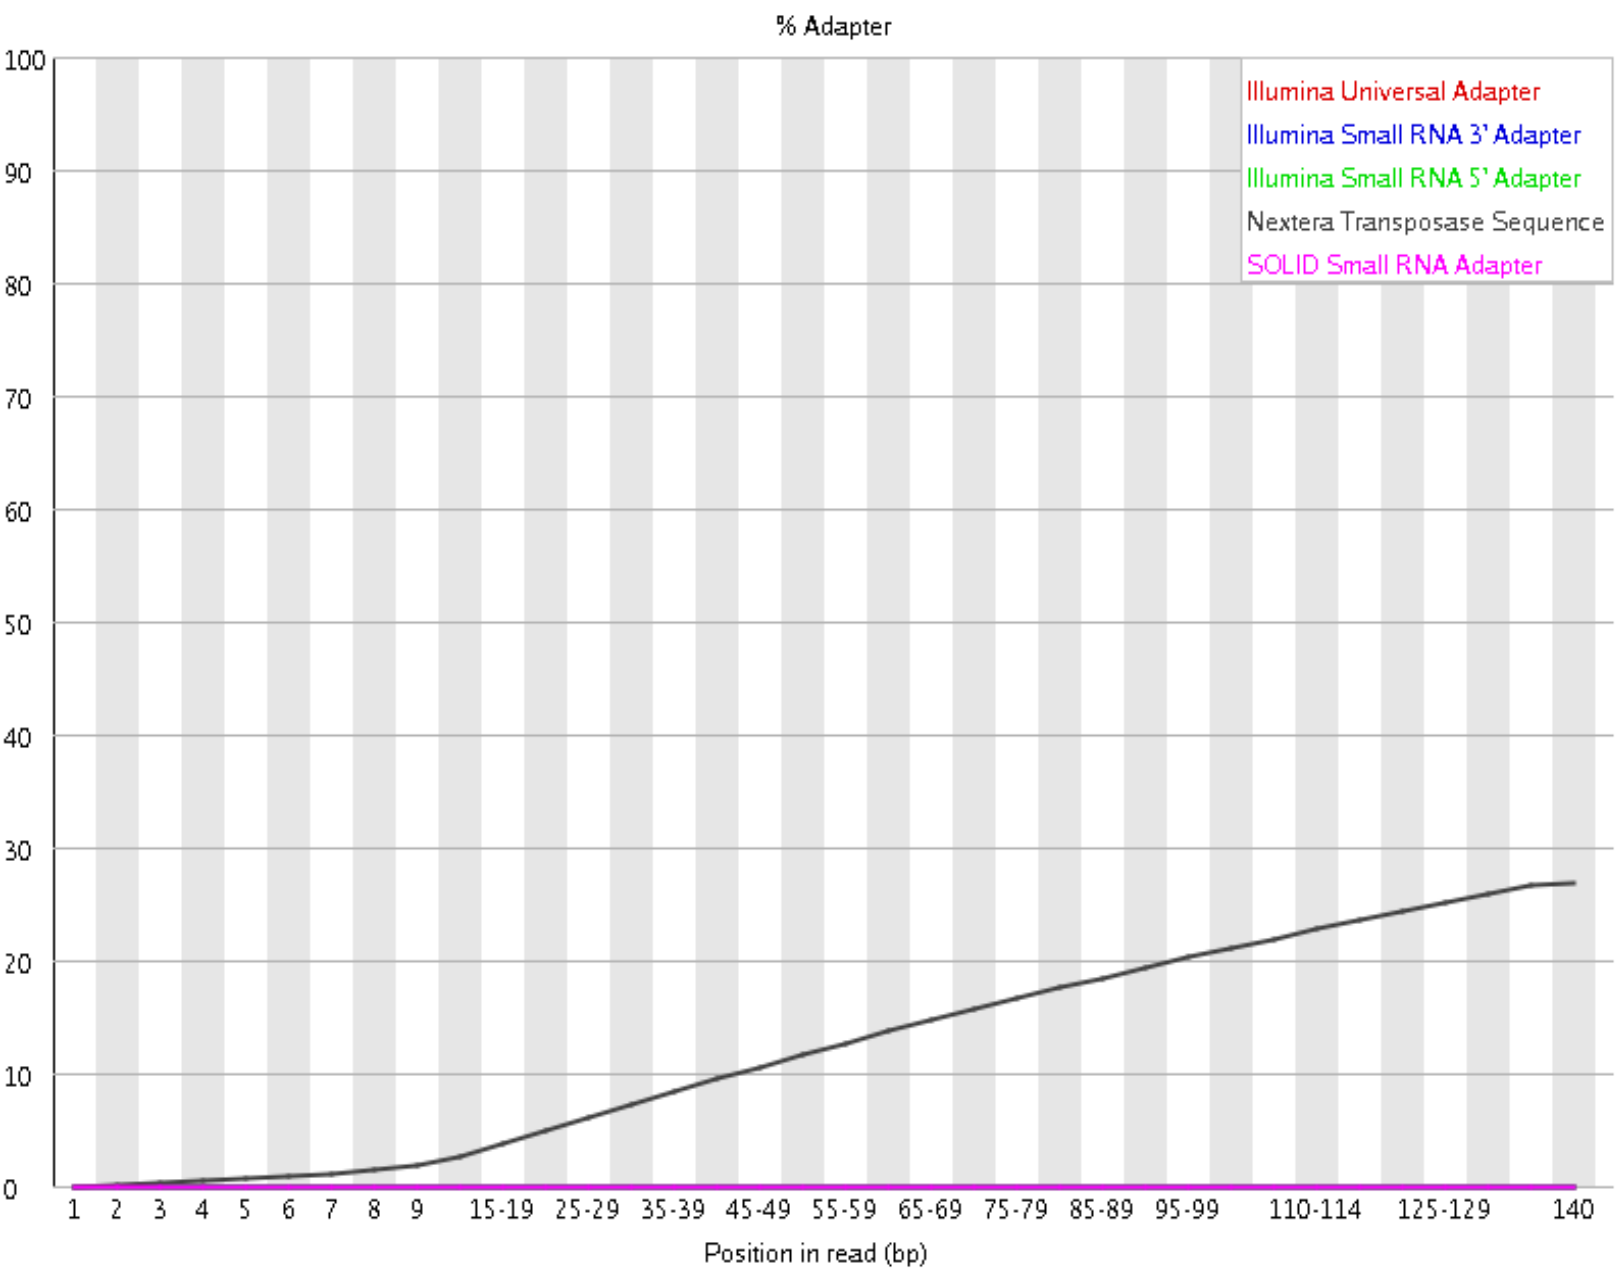

## Summary

-  [Basic Statistics](#)
-  [Per base sequence quality](#)
-  [Per tile sequence quality](#)
-  [Per sequence quality scores](#)
-  [Per base sequence content](#)
-  [Per sequence GC content](#)
-  [Per base N content](#)
-  [Sequence Length Distribution](#)
-  [Sequence Duplication Levels](#)
-  [Overrepresented sequences](#)
-  [Adapter Content](#)

## Basic Statistics

| Measure                           | Value                       |
|-----------------------------------|-----------------------------|
| Filename                          | Venter_S1_merge_R1.fastq.gz |
| File type                         | Conventional base calls     |
| Encoding                          | Sanger / Illumina 1.9       |
| Total Sequences                   | 789239544                   |
| Sequences flagged as poor quality | 0                           |
| Sequence length                   | 151                         |
| %GC                               | 44                          |

## Per base sequence quality



Quality scores across all bases (Sanger / Illumina 1.9 encoding)

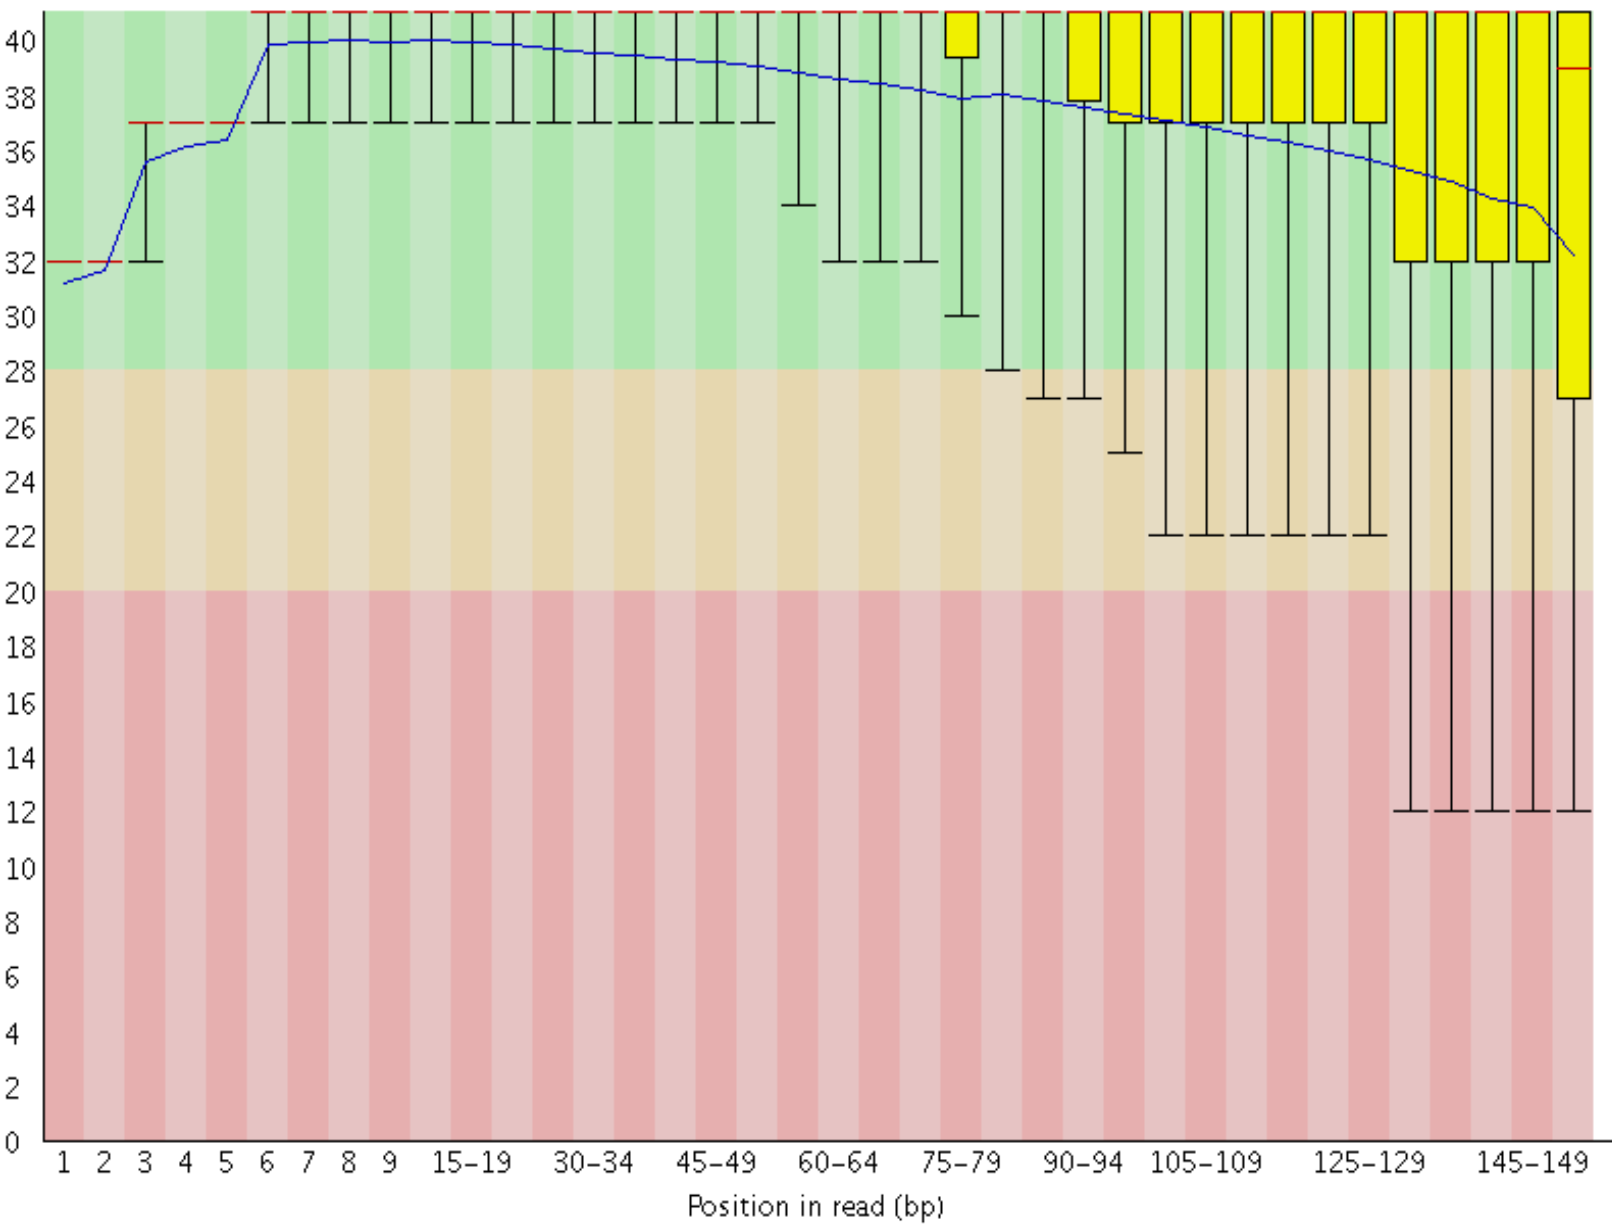

❌ Per tile sequence quality

Quality per tile

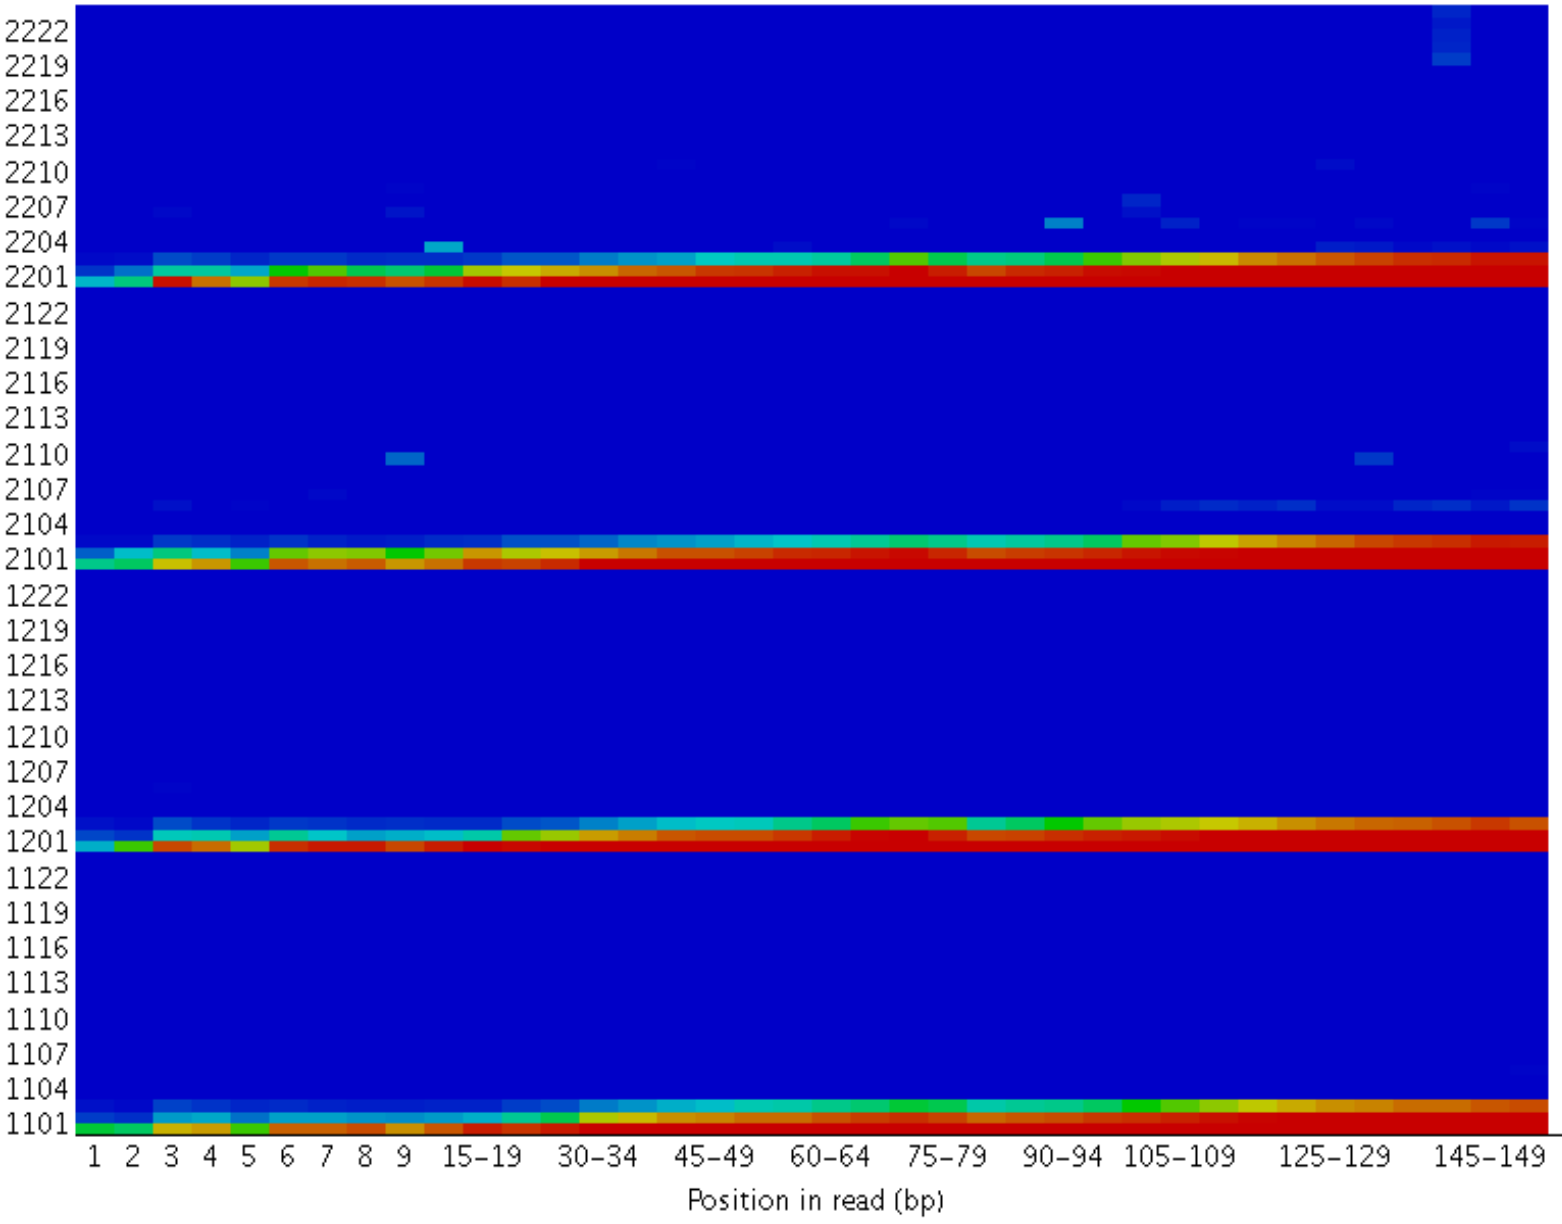

 **Per sequence quality scores**

Quality score distribution over all sequences

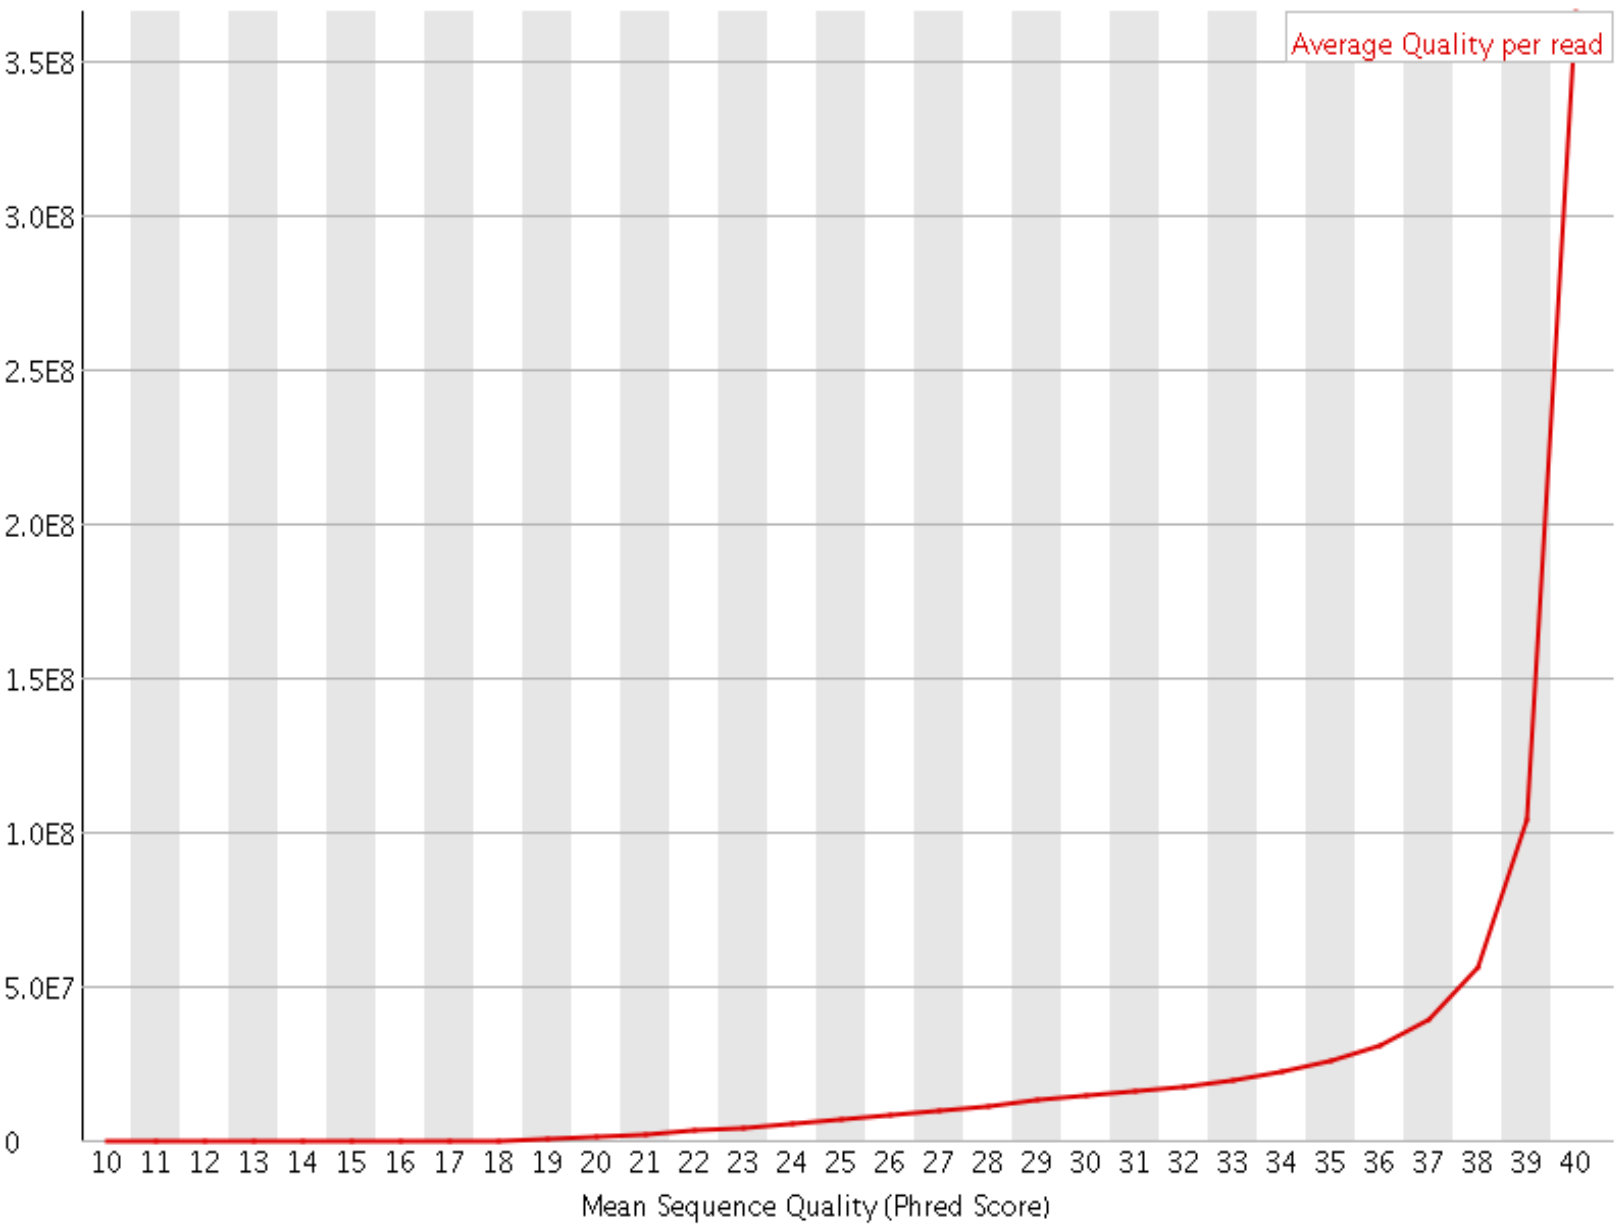

 **Per base sequence content**

Sequence content across all bases

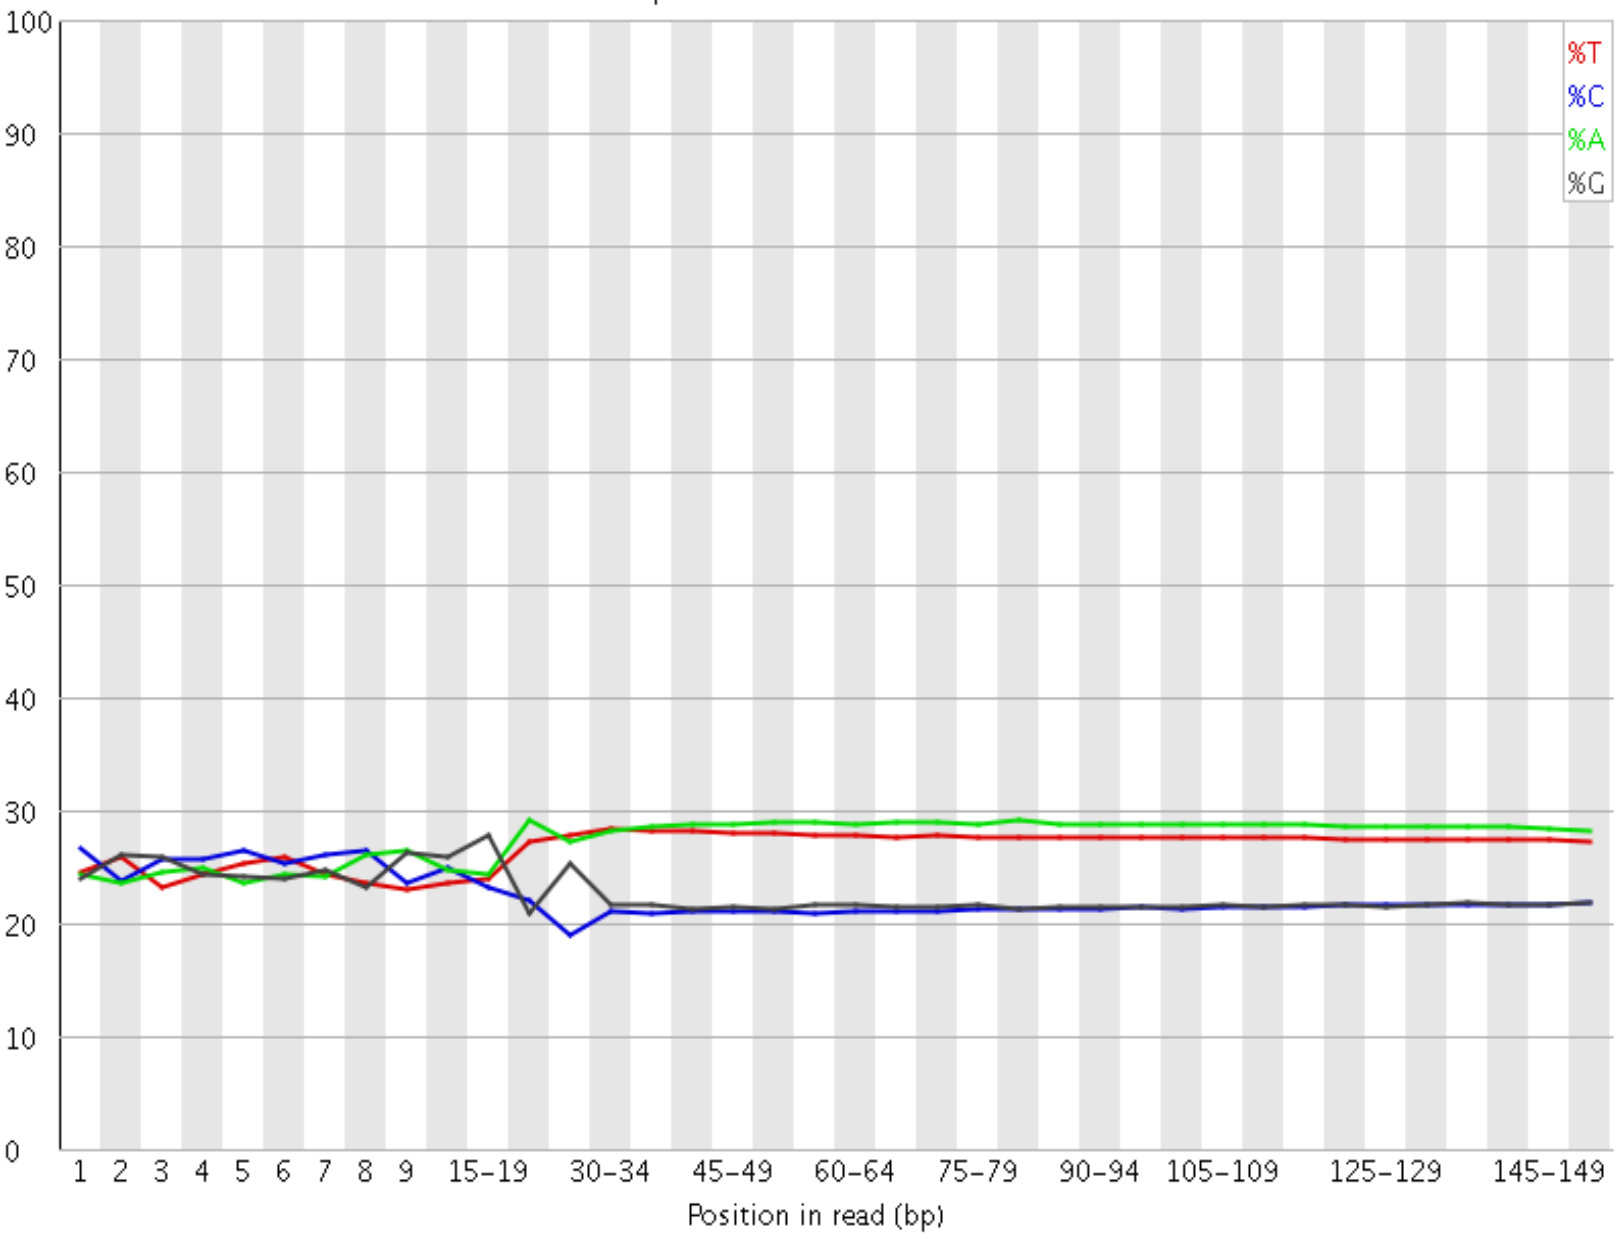

⚠ Per sequence GC content

GC distribution over all sequences

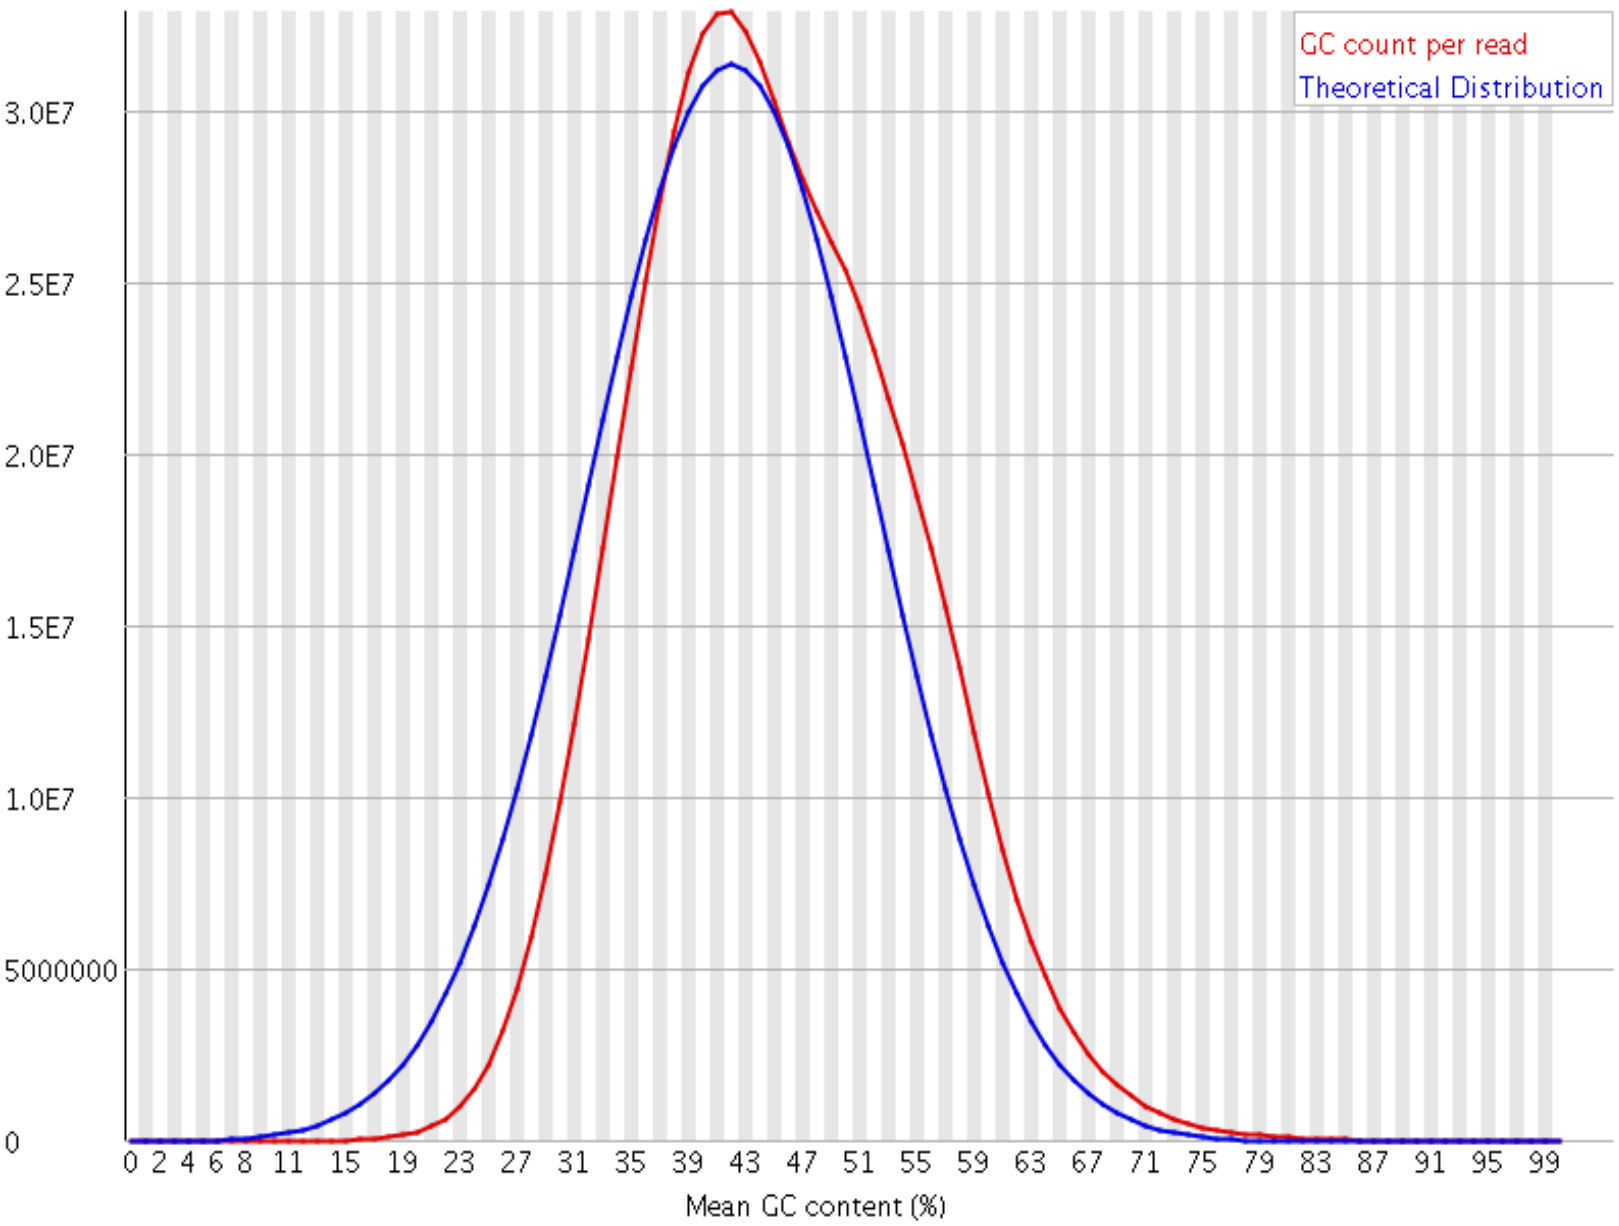

 **Per base N content**

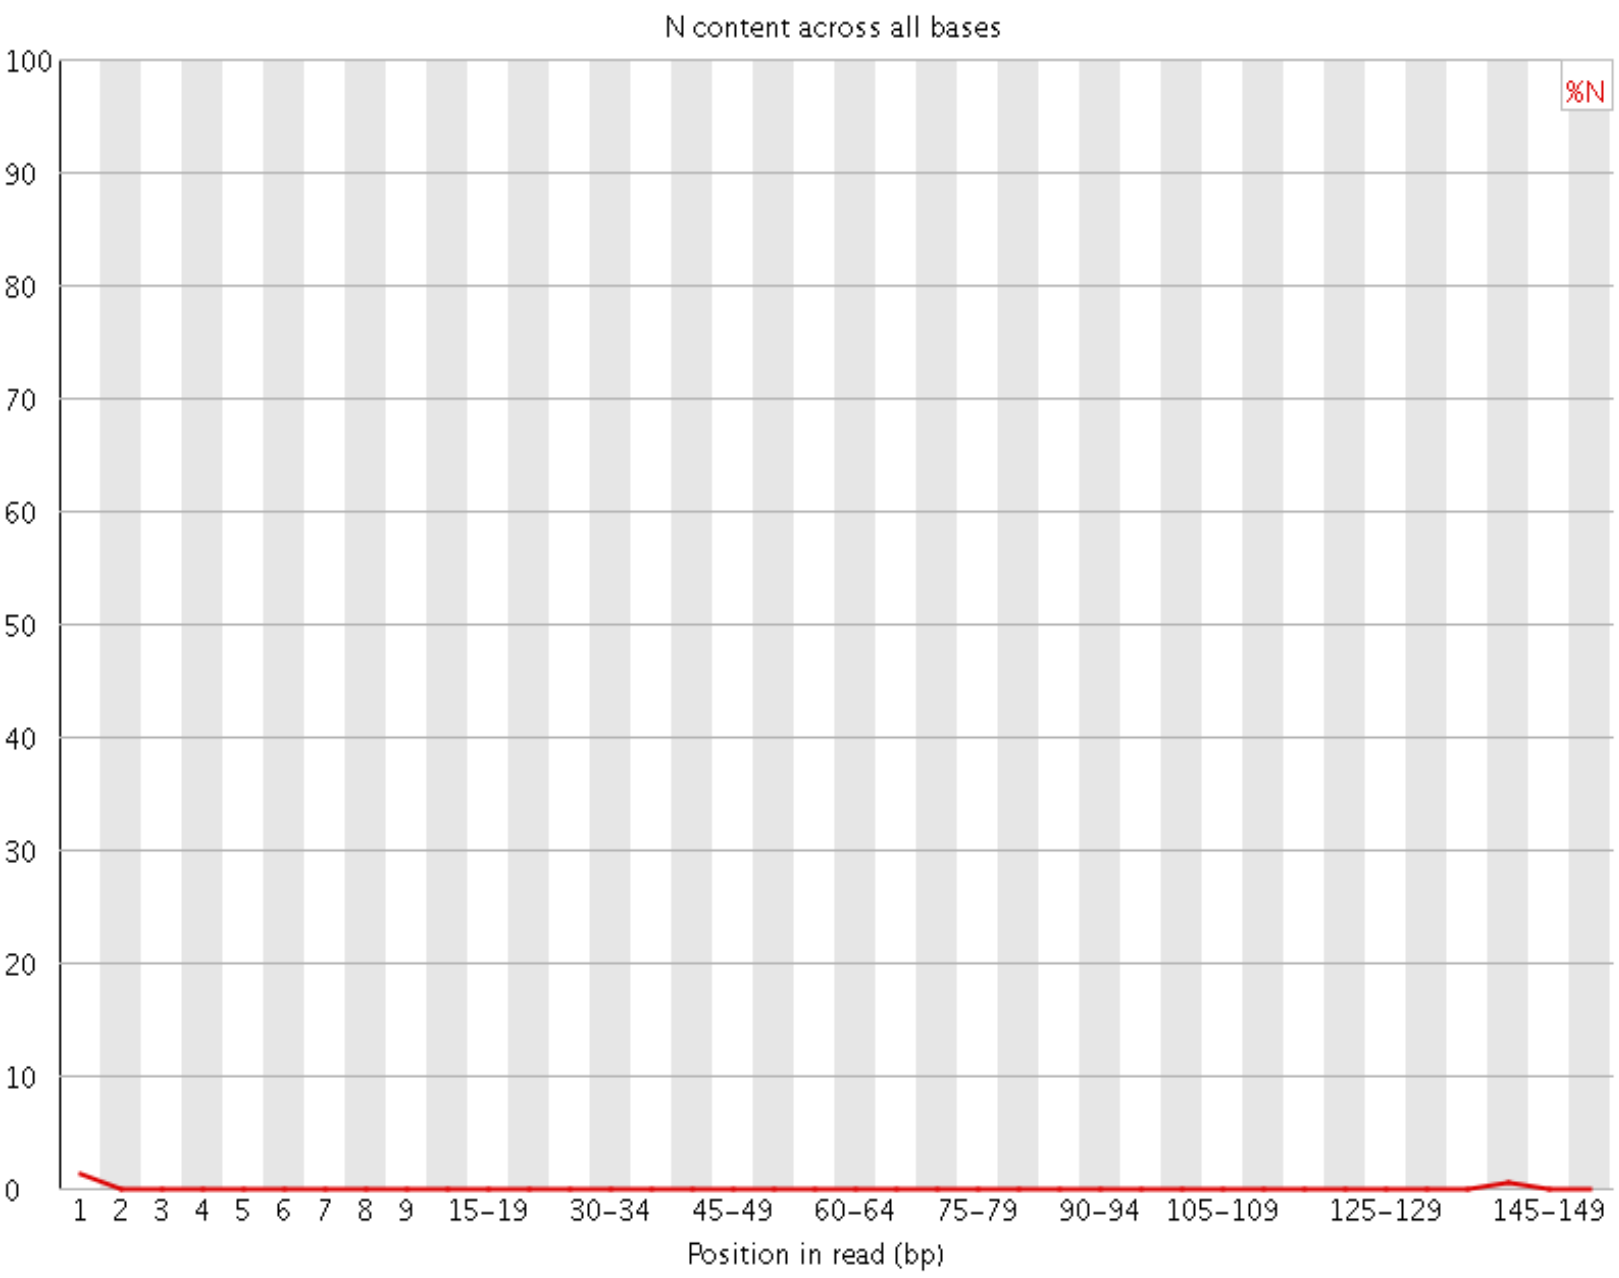

## Sequence Length Distribution

Distribution of sequence lengths over all sequences

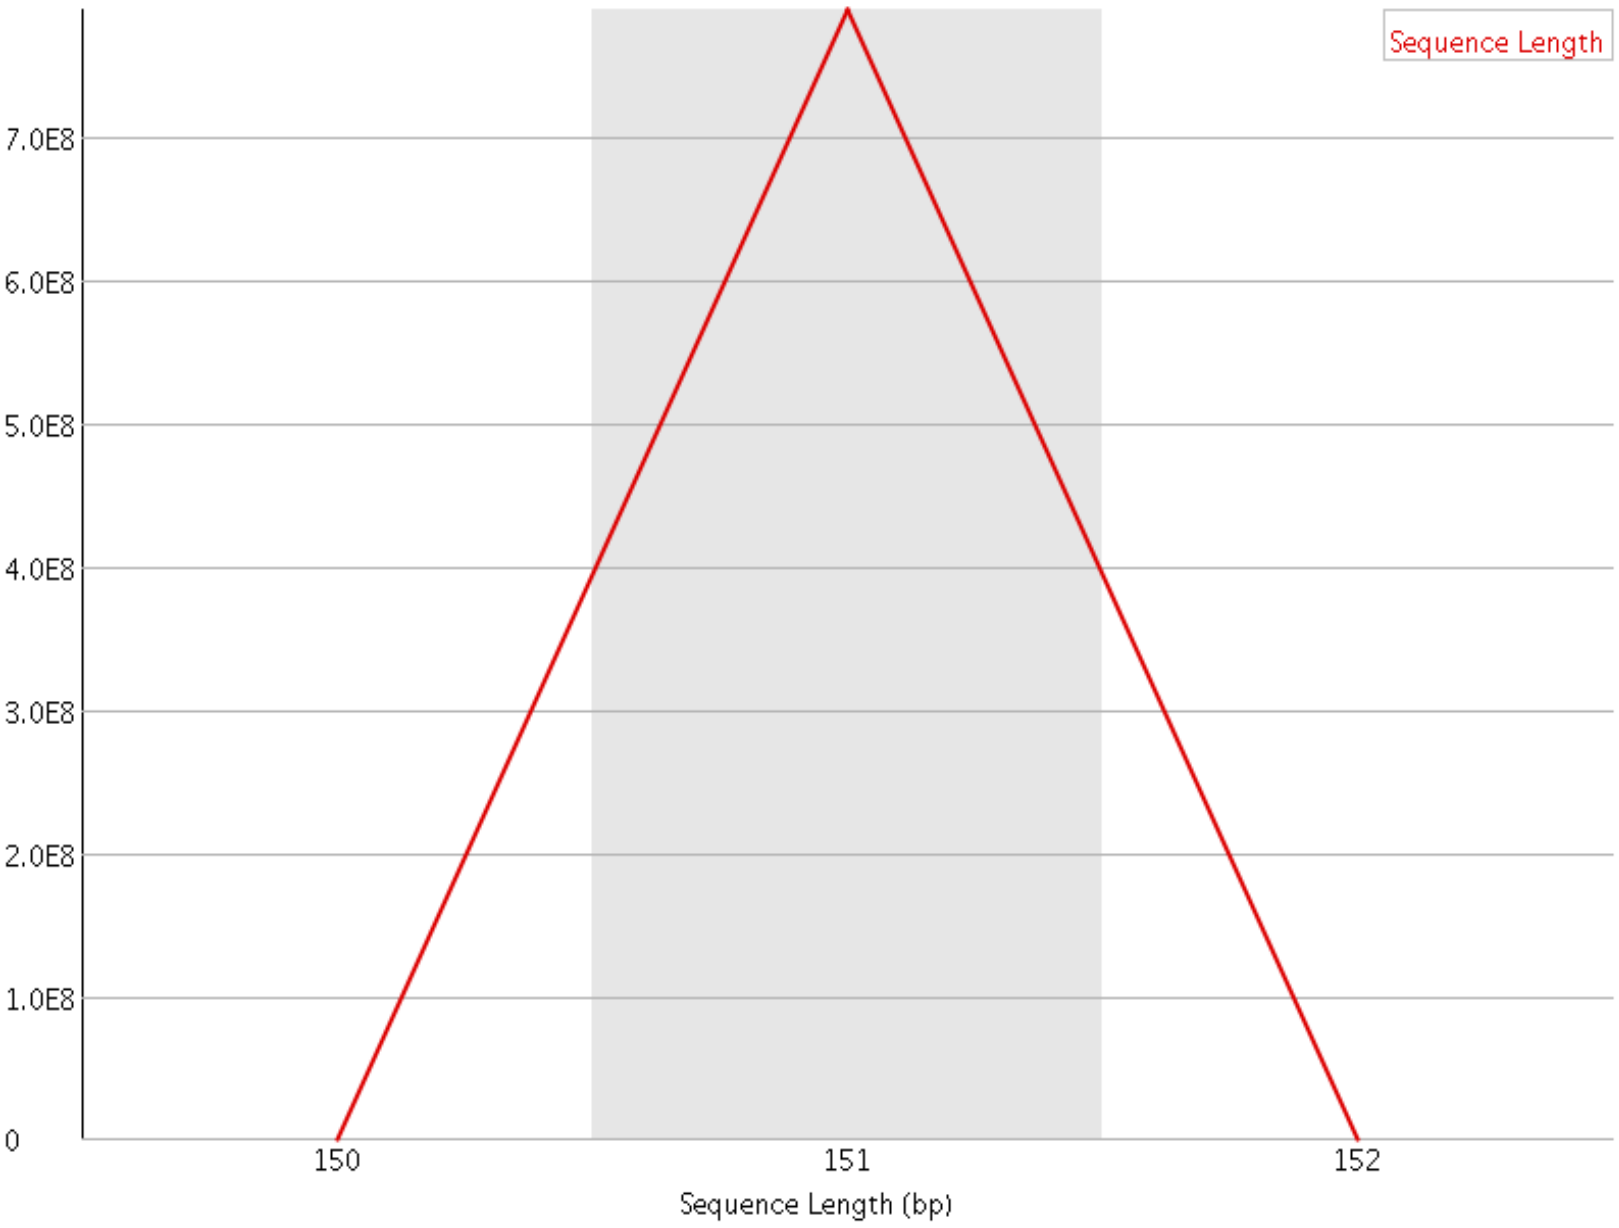

## Sequence Duplication Levels

Percent of seqs remaining if deduplicated 95.44%

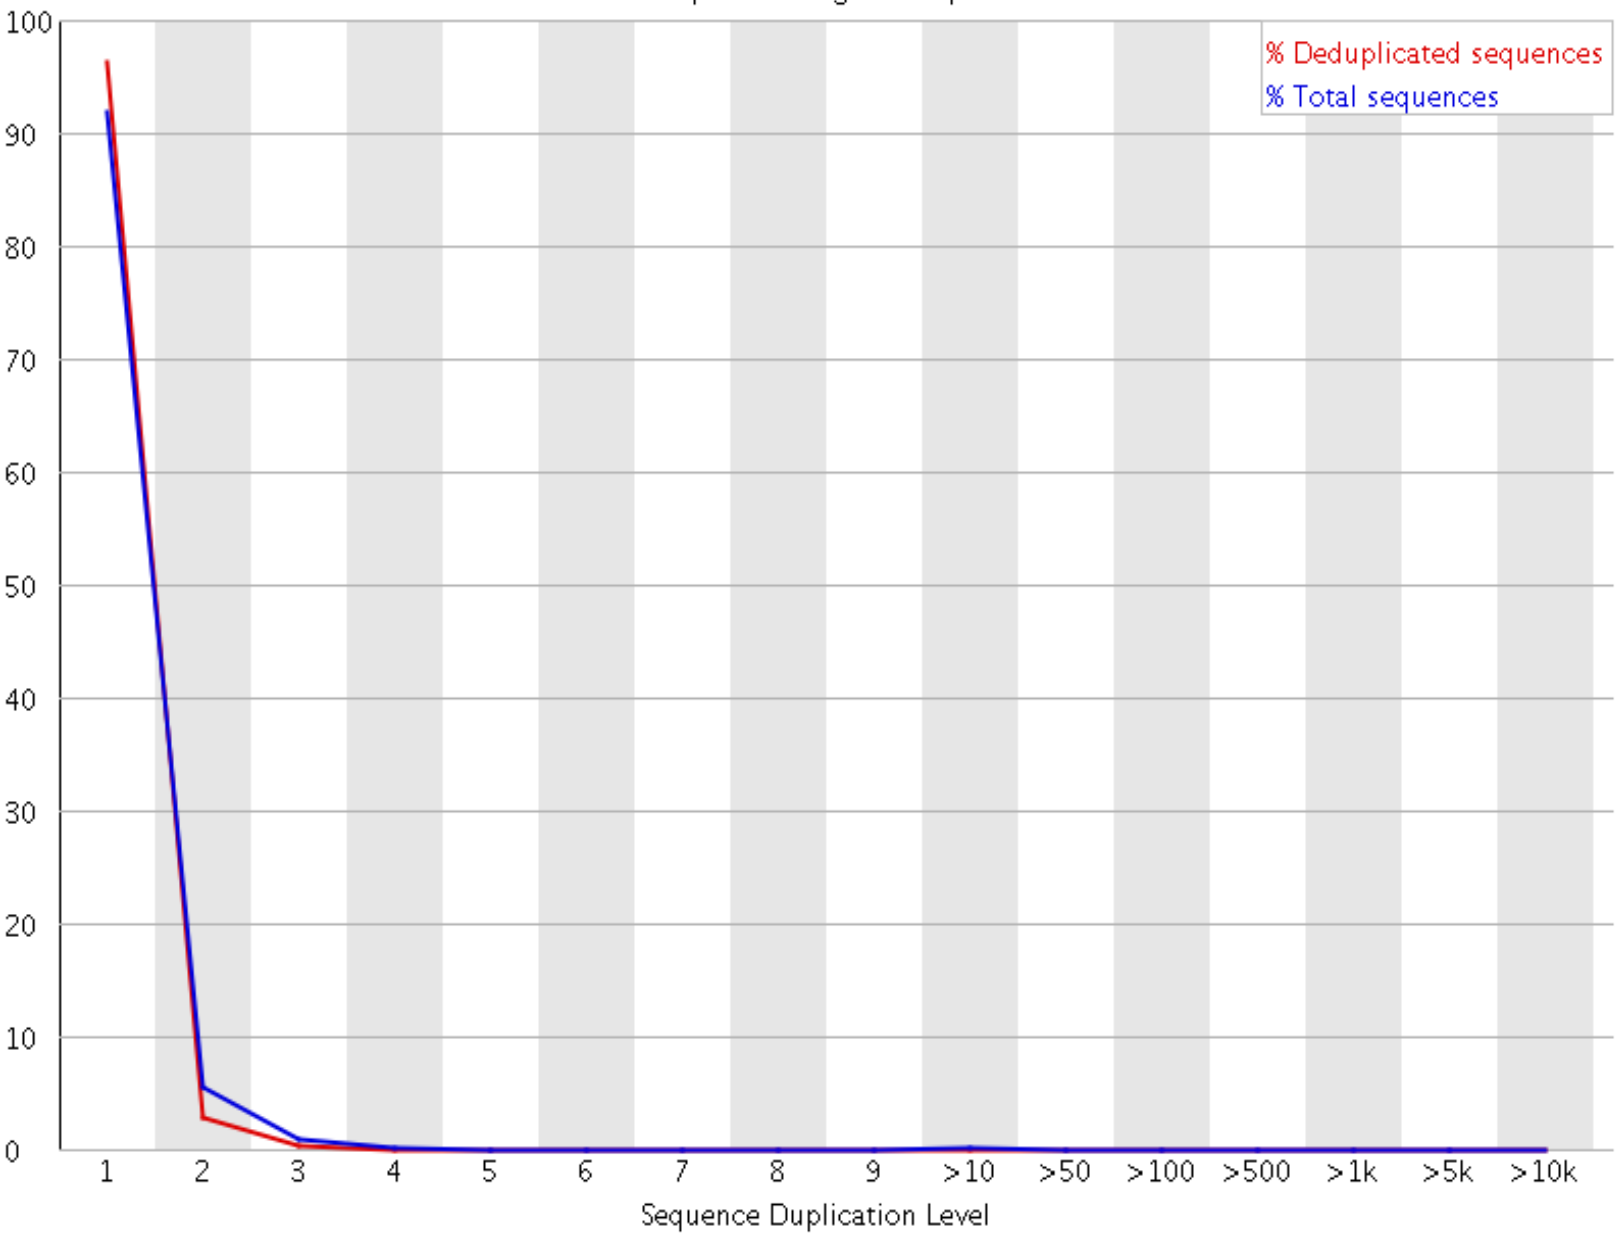

 **Overrepresented sequences**

No overrepresented sequences

 **Adapter Content**



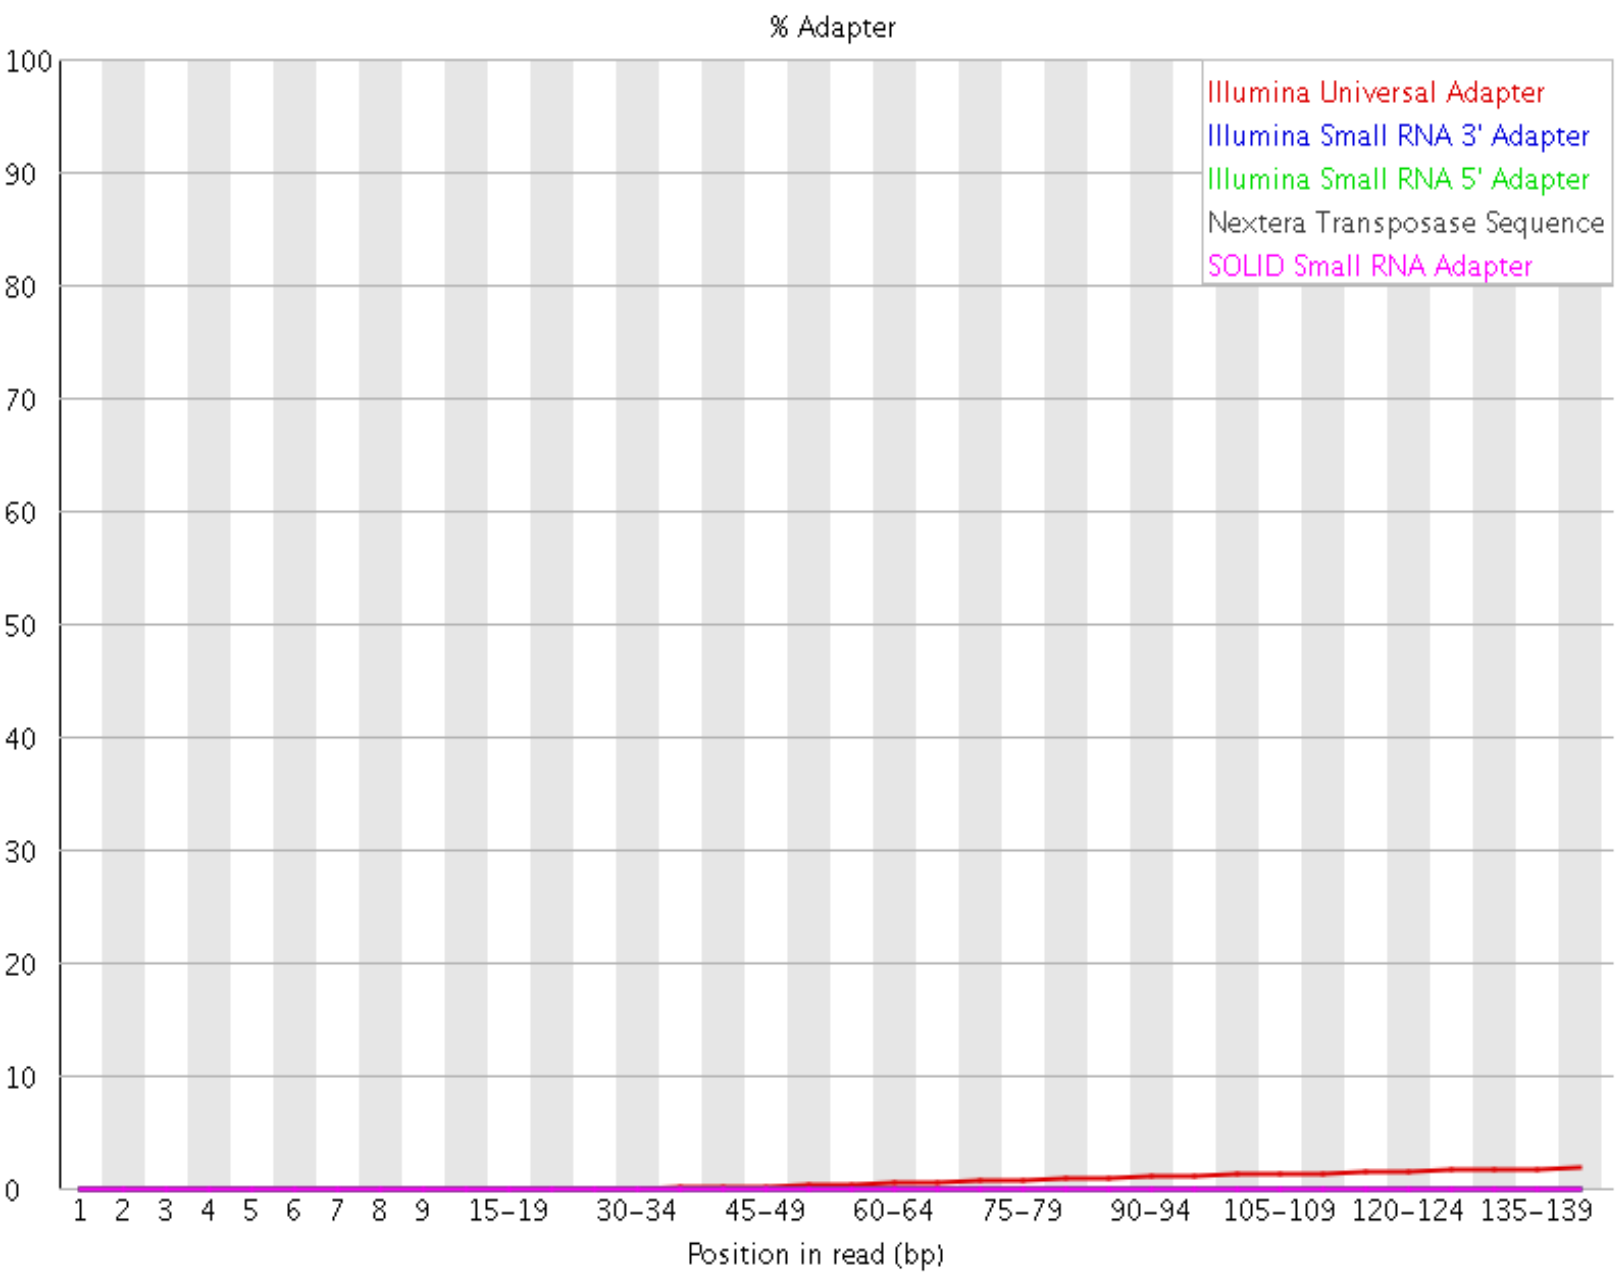

## Summary

-  [Basic Statistics](#)
-  [Per base sequence quality](#)
-  [Per tile sequence quality](#)
-  [Per sequence quality scores](#)
-  [Per base sequence content](#)
-  [Per sequence GC content](#)
-  [Per base N content](#)
-  [Sequence Length Distribution](#)
-  [Sequence Duplication Levels](#)
-  [Overrepresented sequences](#)
-  [Adapter Content](#)

## Basic Statistics

| Measure                           | Value                       |
|-----------------------------------|-----------------------------|
| Filename                          | Venter_S1_merge_R2.fastq.gz |
| File type                         | Conventional base calls     |
| Encoding                          | Sanger / Illumina 1.9       |
| Total Sequences                   | 789239544                   |
| Sequences flagged as poor quality | 0                           |
| Sequence length                   | 151                         |
| %GC                               | 43                          |

## Per base sequence quality

Quality scores across all bases (Sanger / Illumina 1.9 encoding)

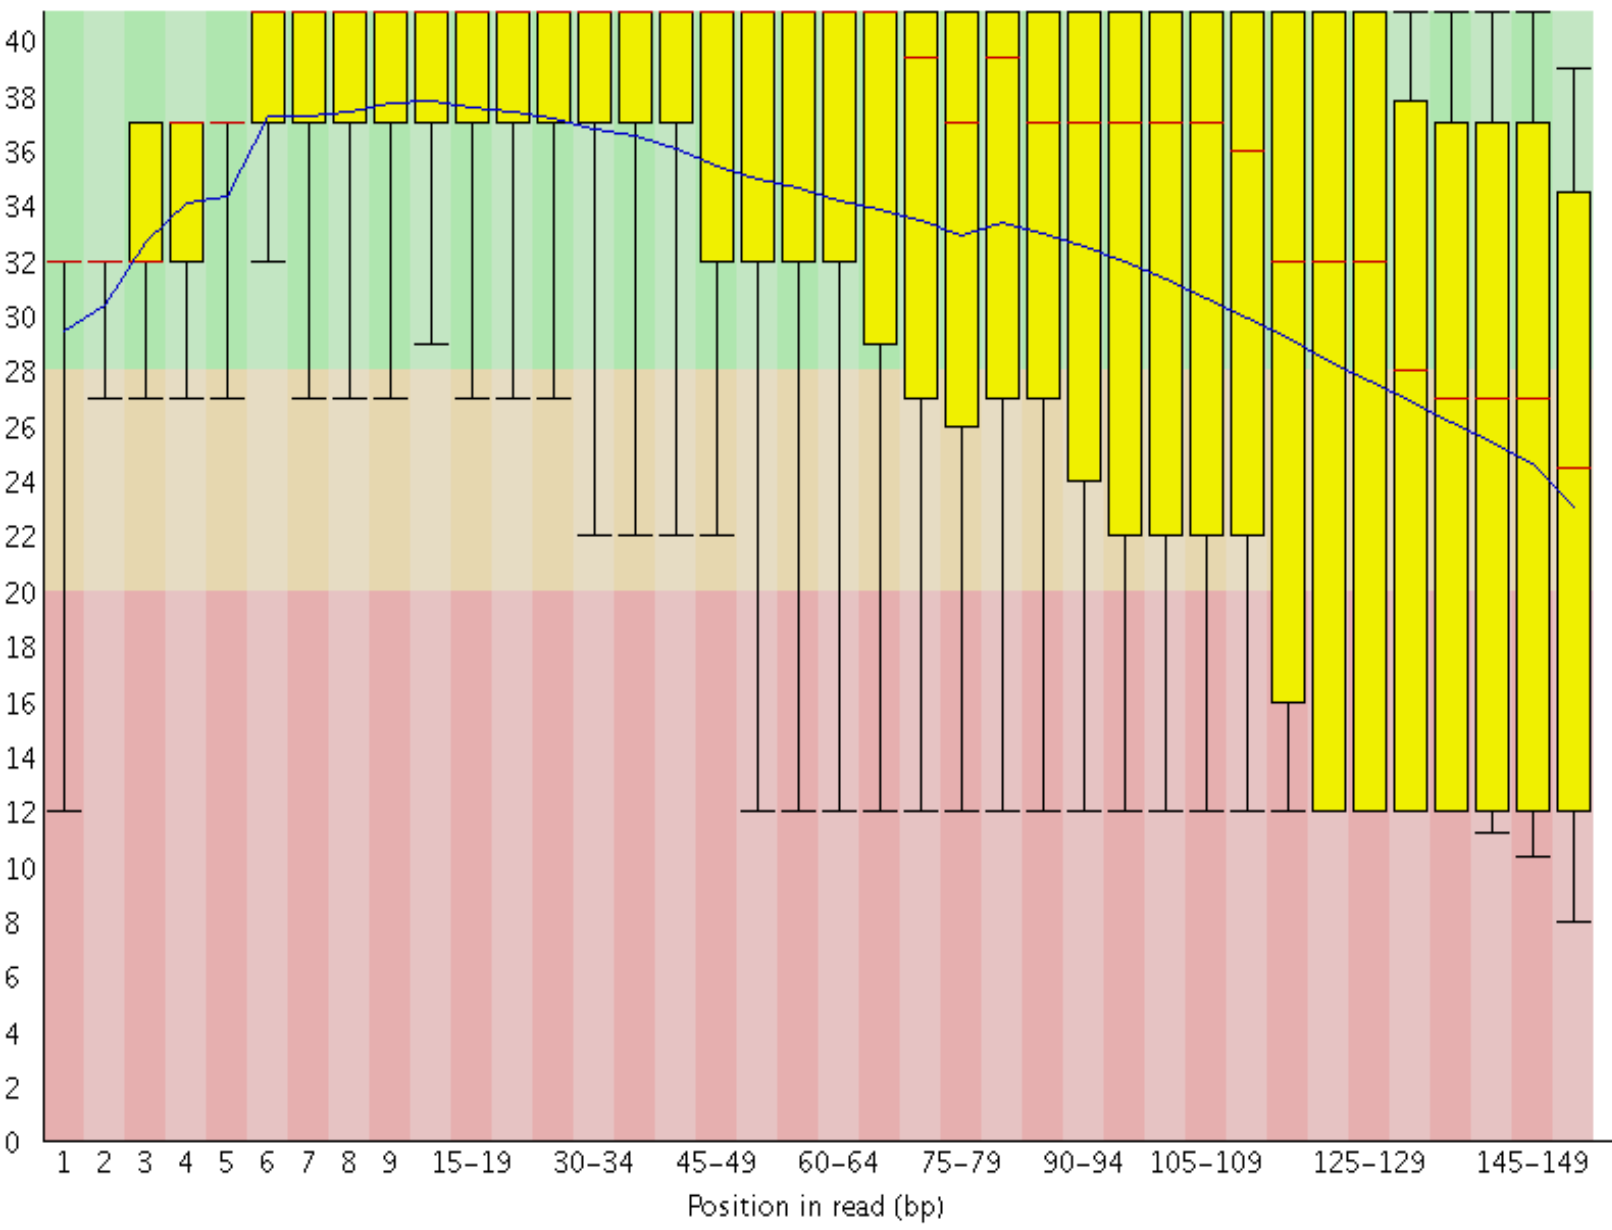

 **Per tile sequence quality**

Quality per tile

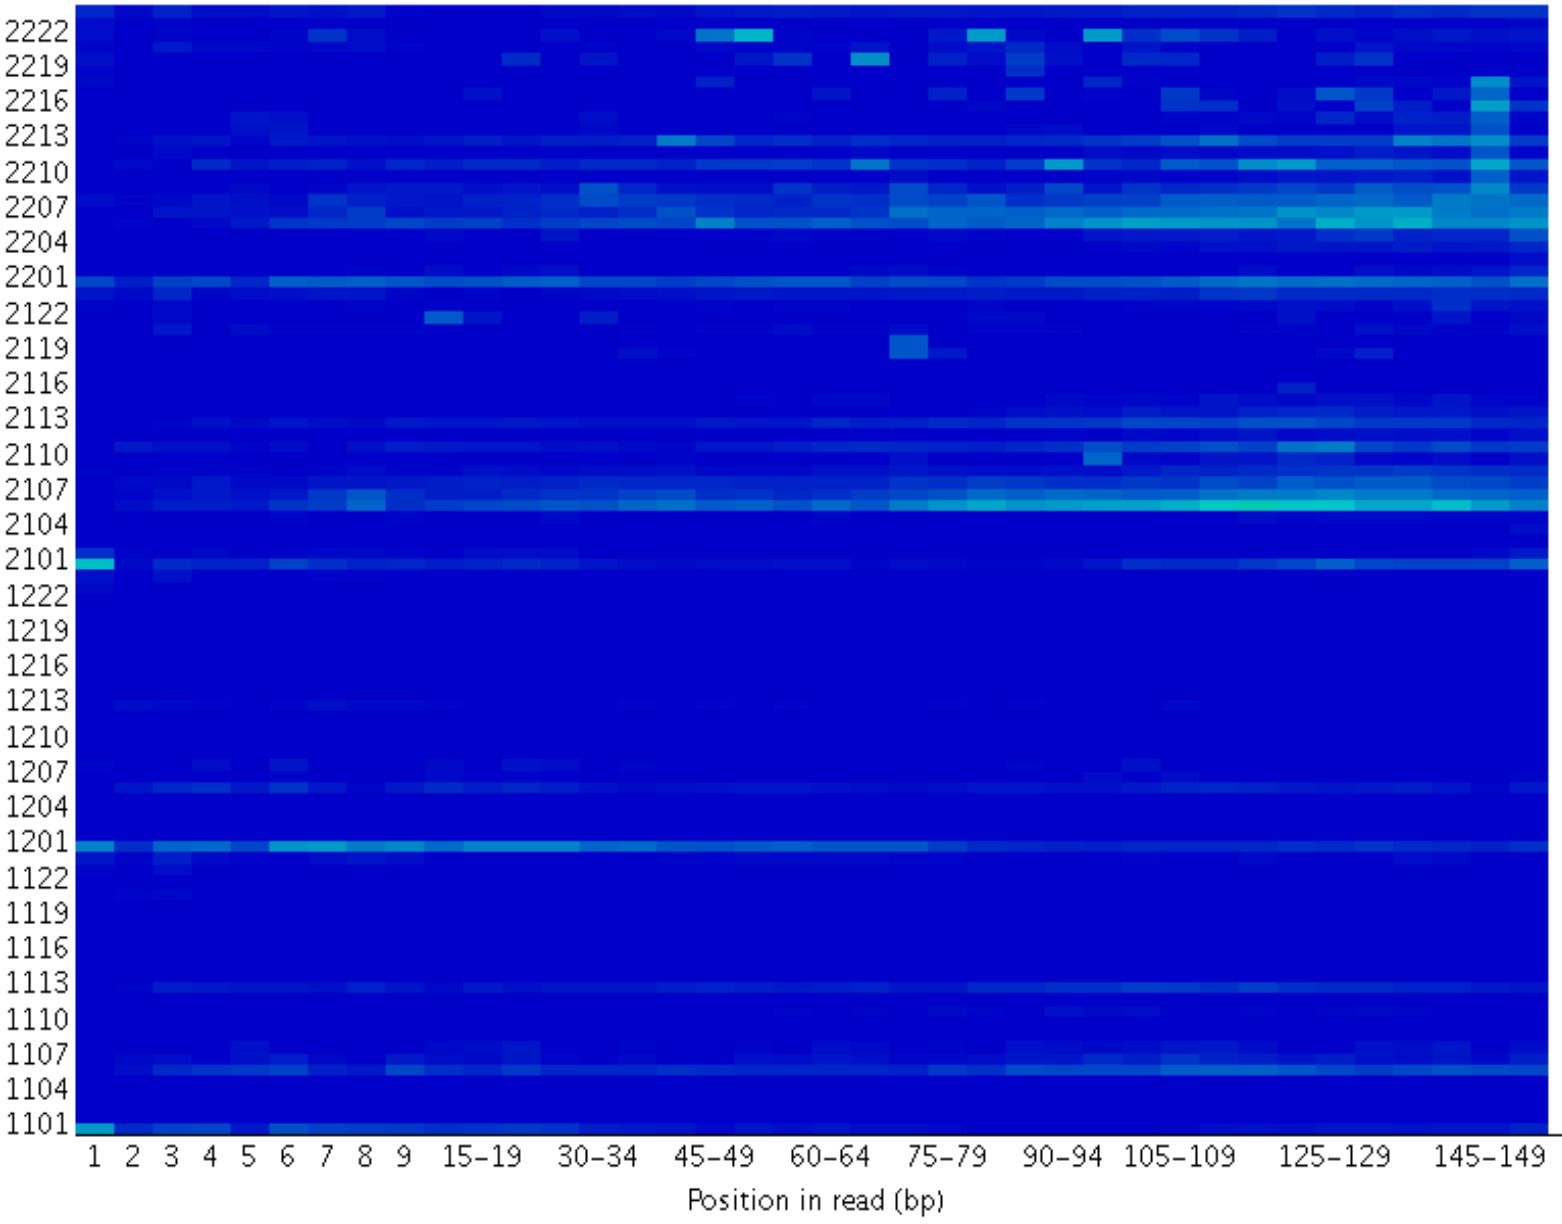

 **Per sequence quality scores**

Quality score distribution over all sequences

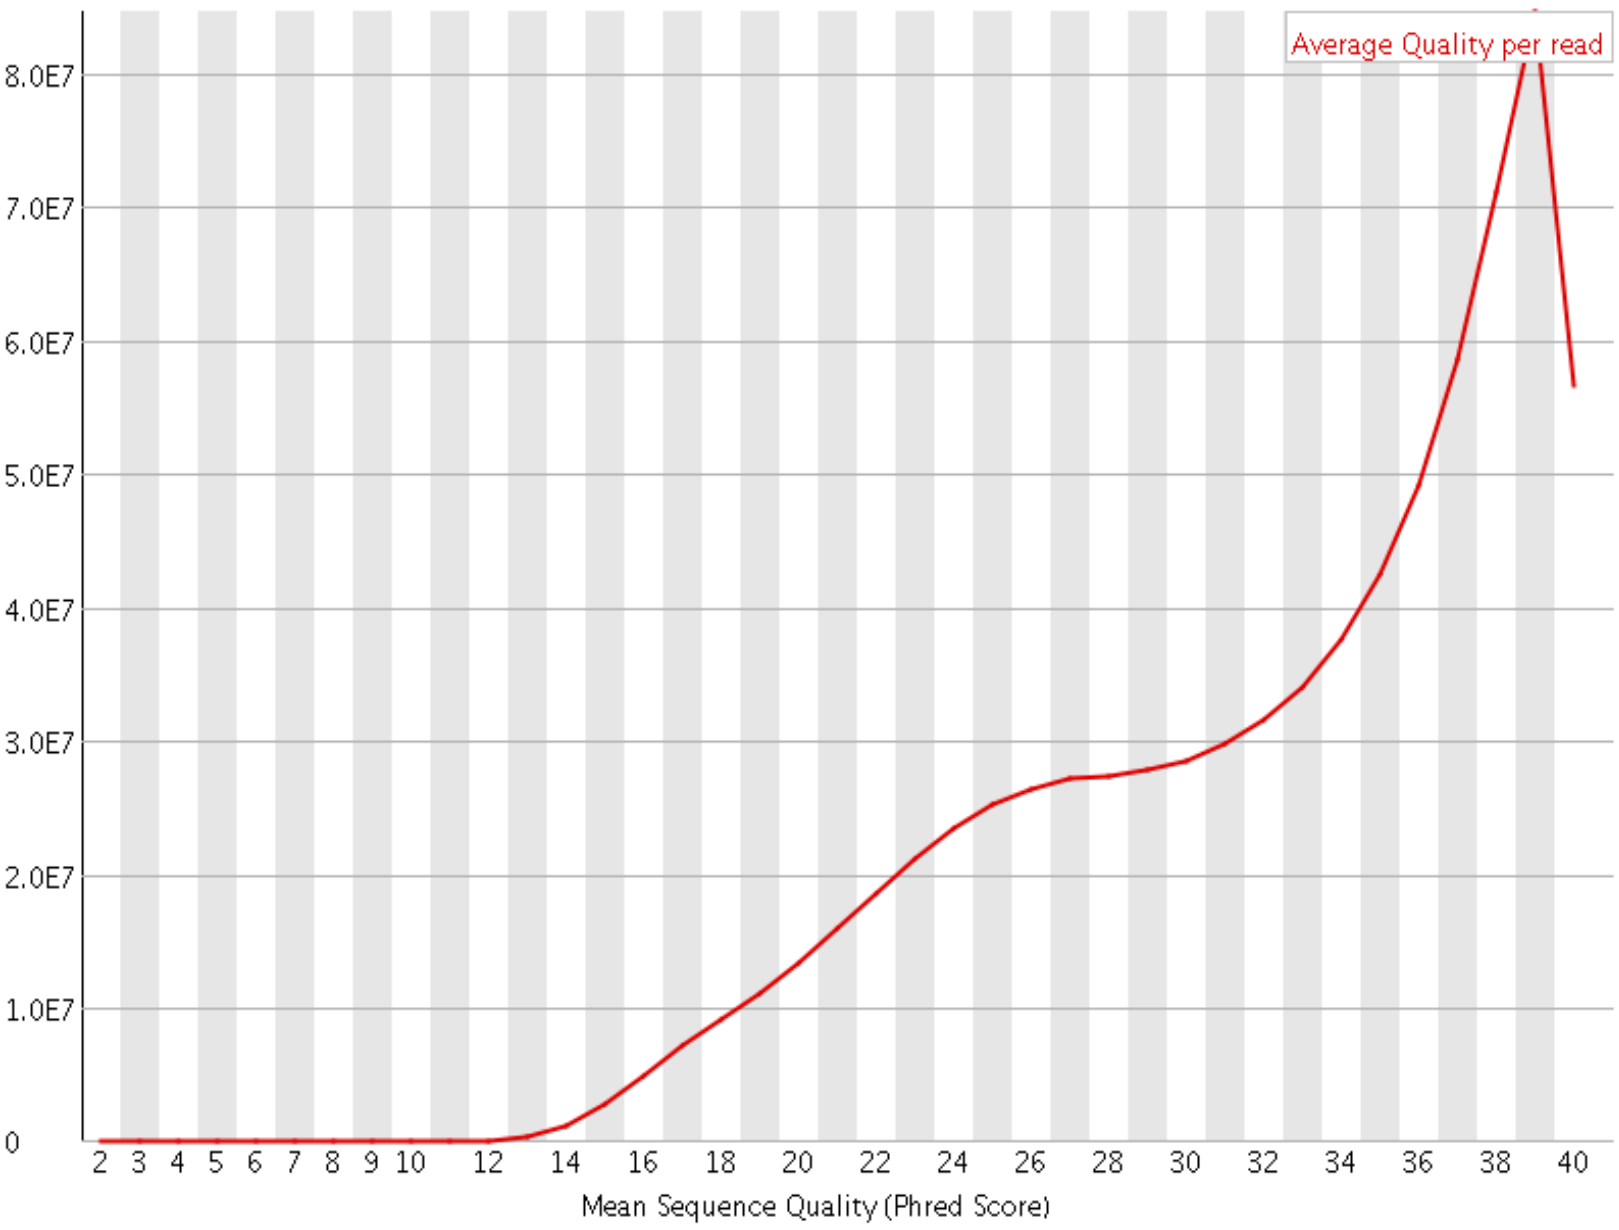

 **Per base sequence content**

Sequence content across all bases

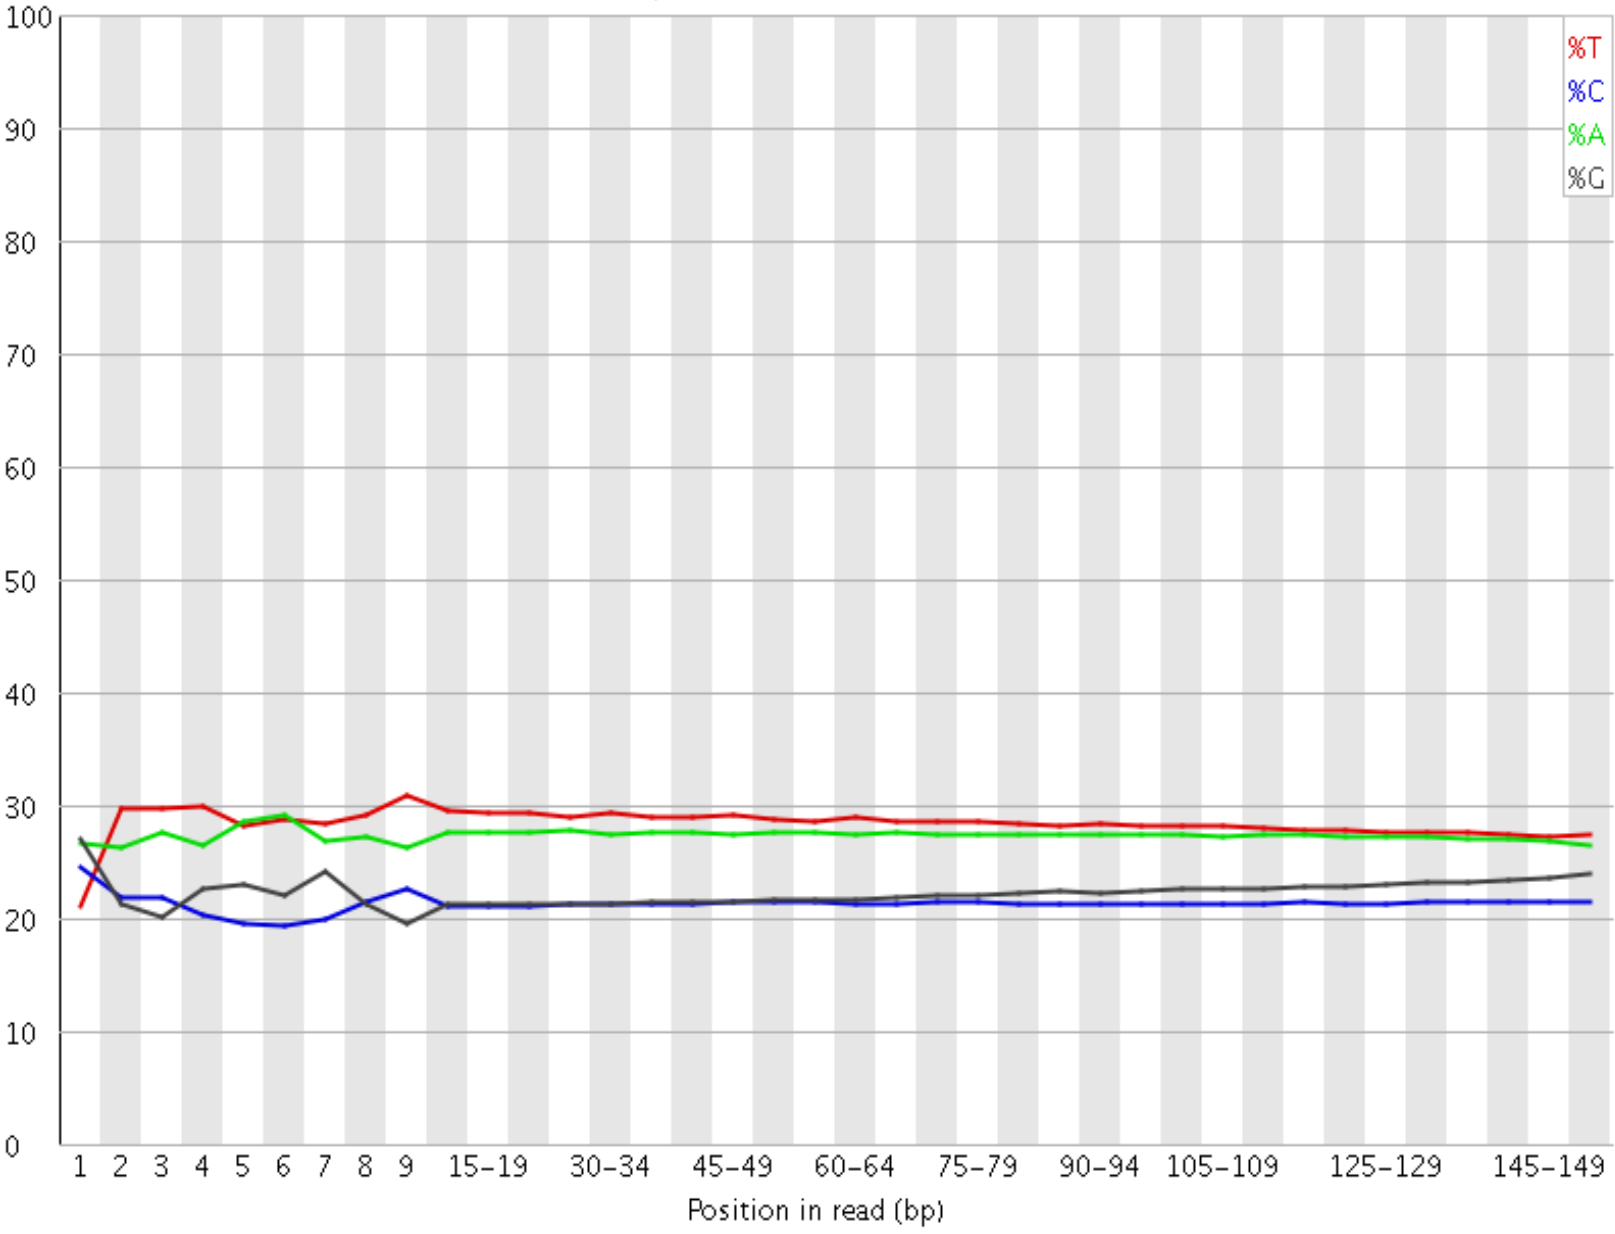

⚠ Per sequence GC content

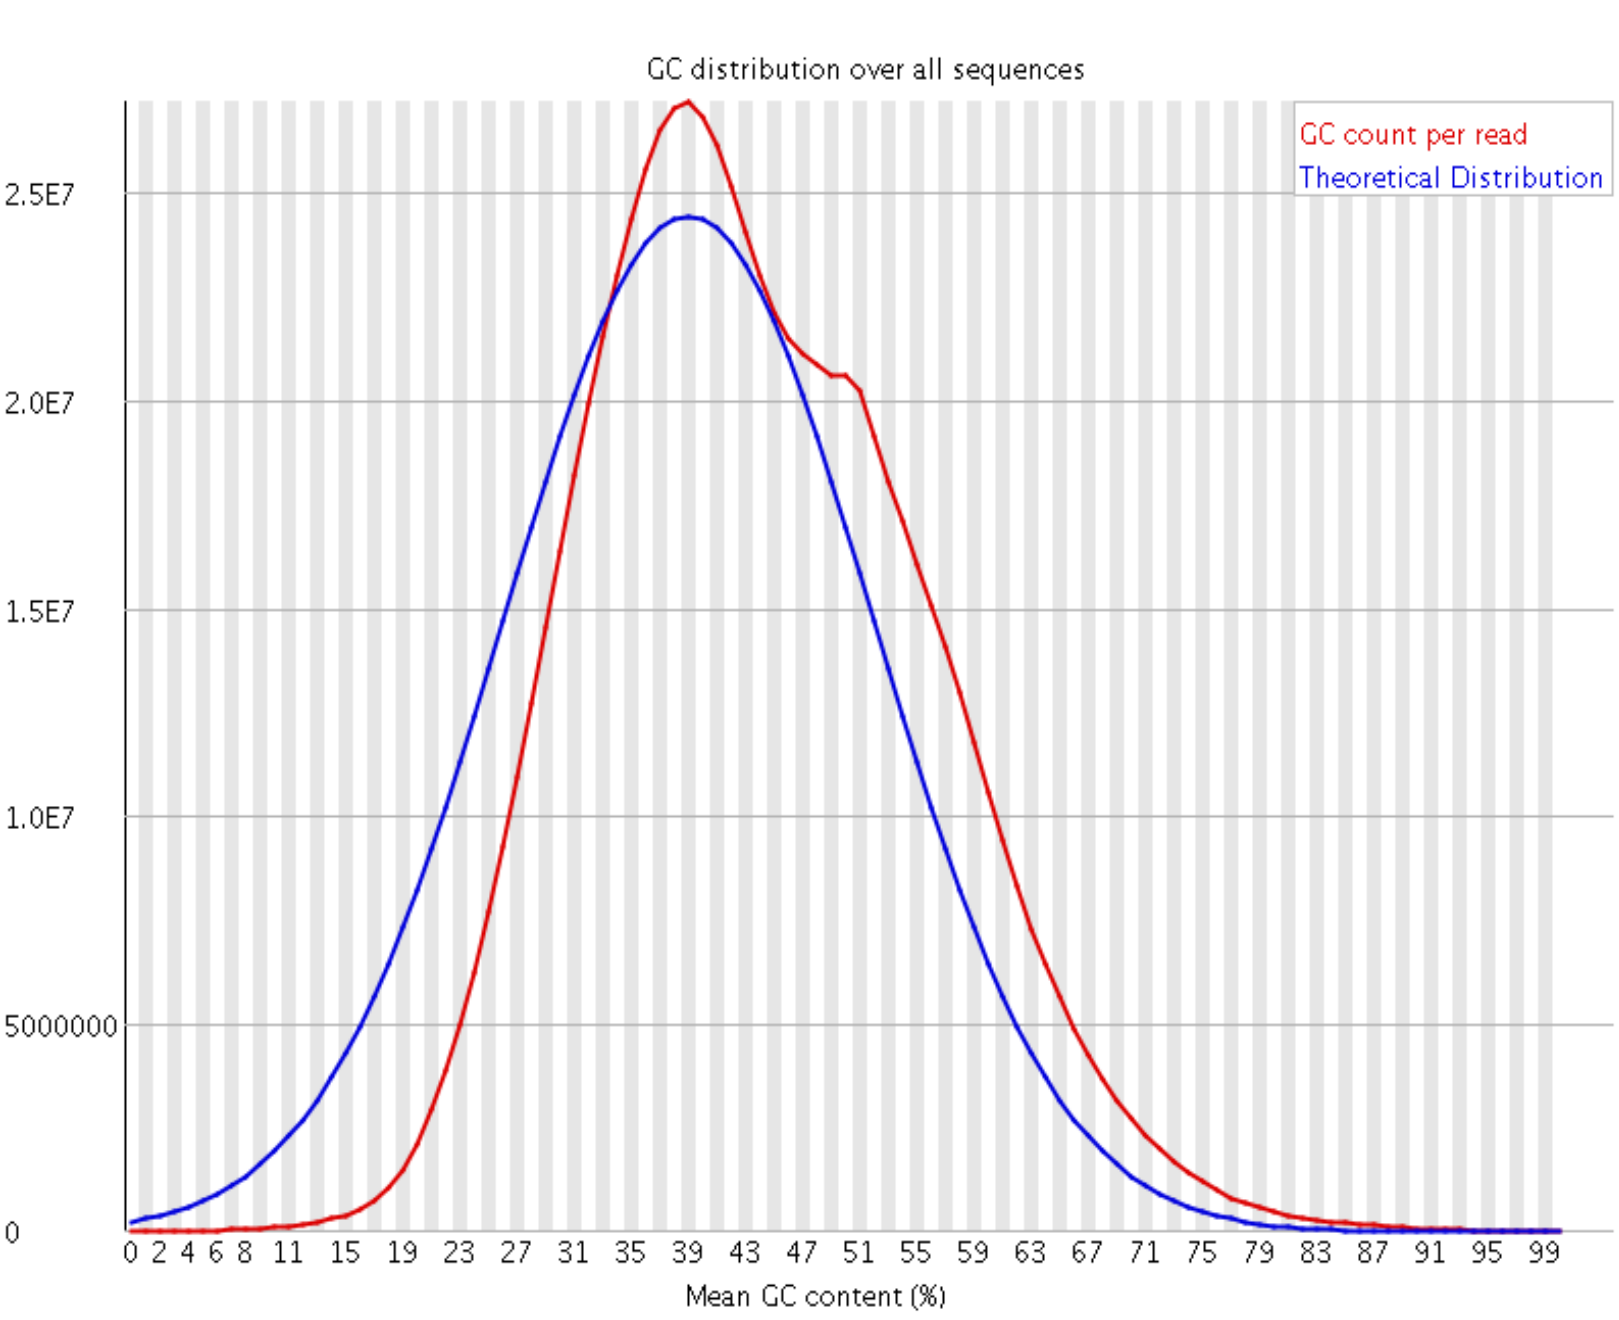

 **Per base N content**

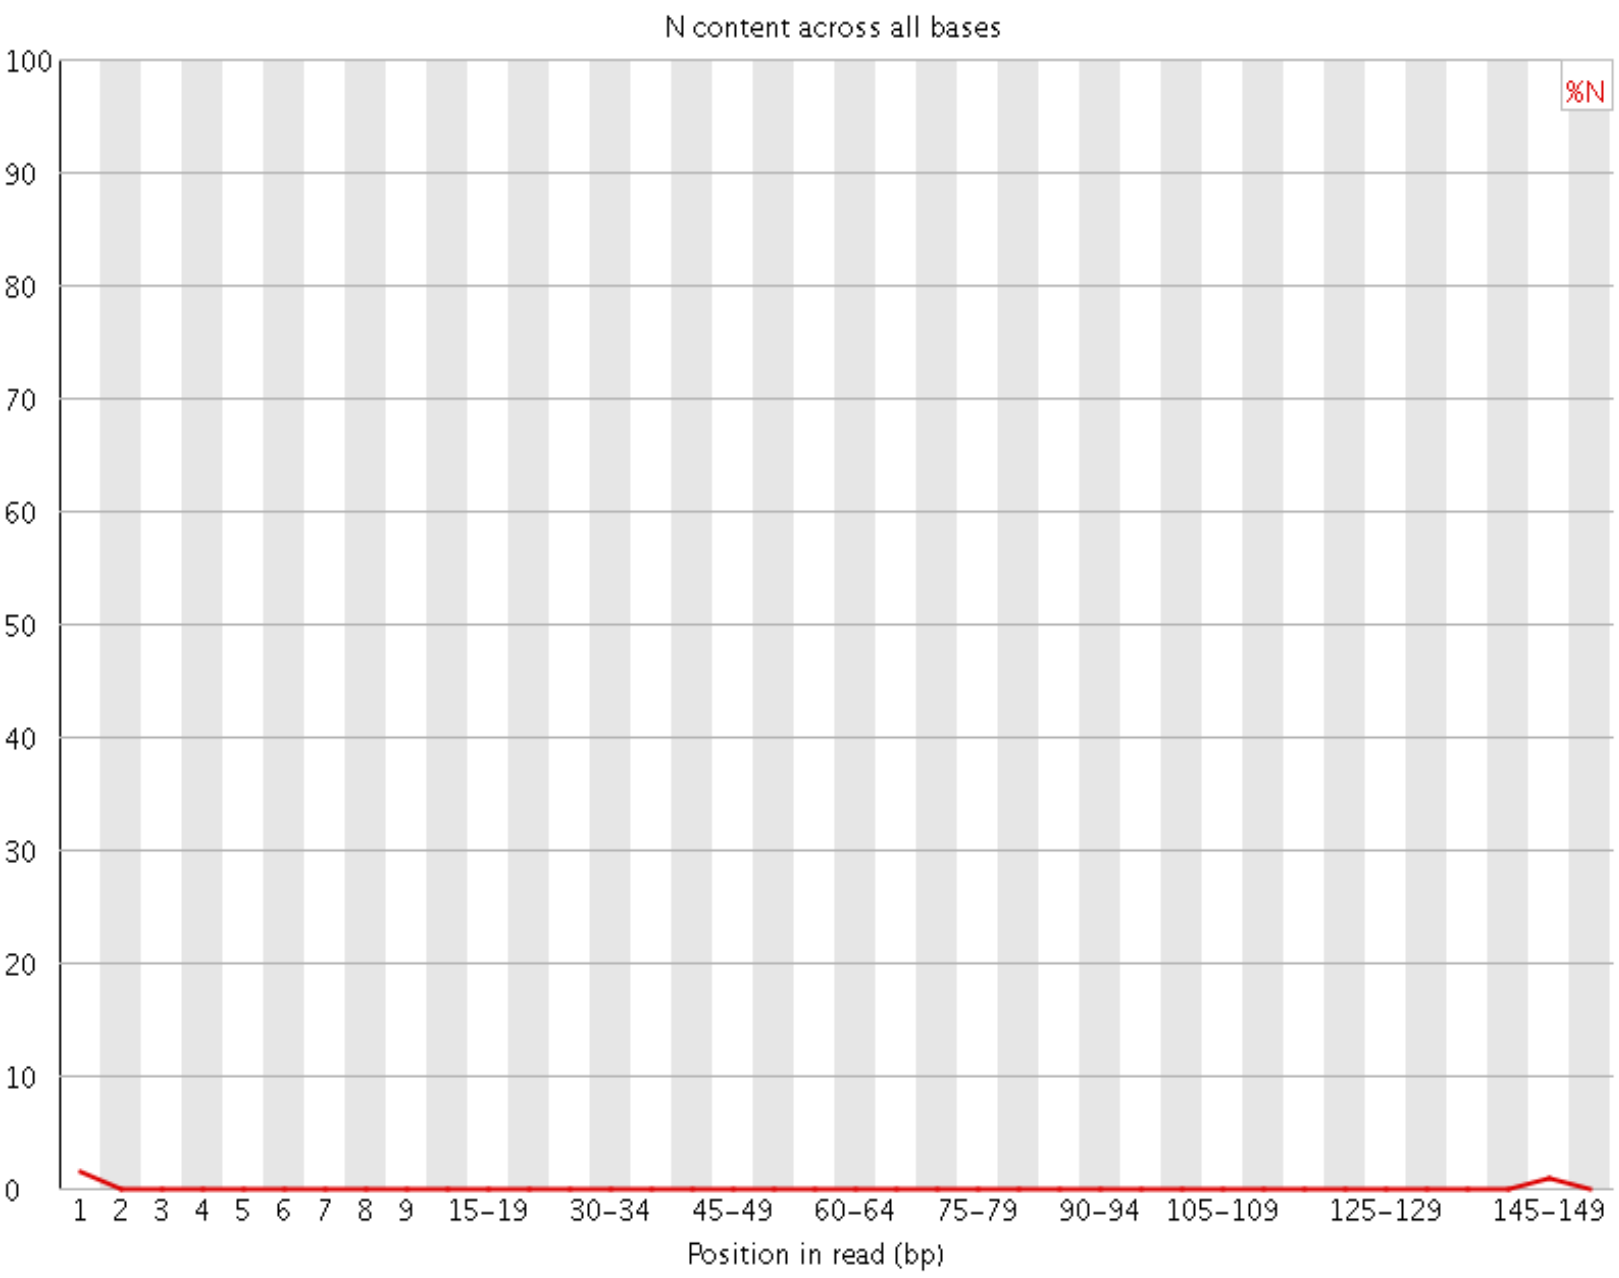

## Sequence Length Distribution



Distribution of sequence lengths over all sequences



## Sequence Duplication Levels

Percent of seqs remaining if deduplicated 80.29%

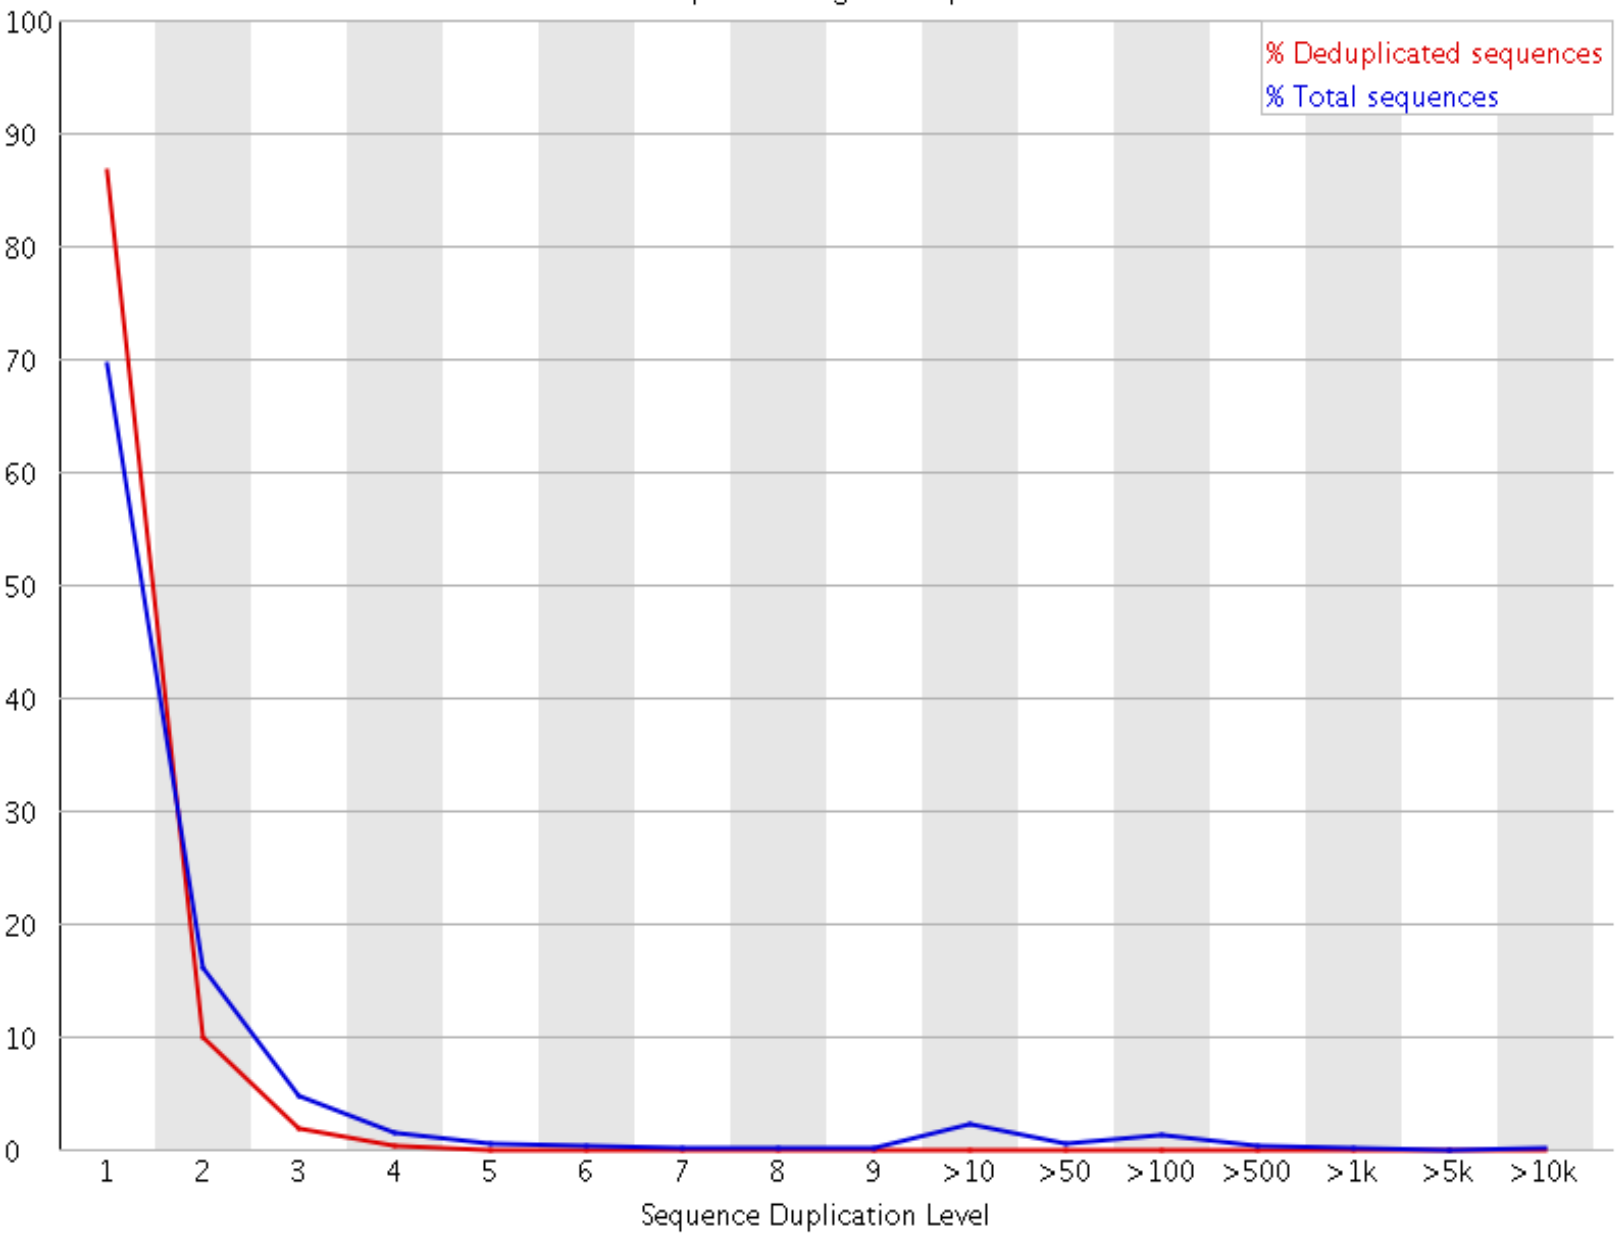

 **Overrepresented sequences**

No overrepresented sequences

 **Adapter Content**

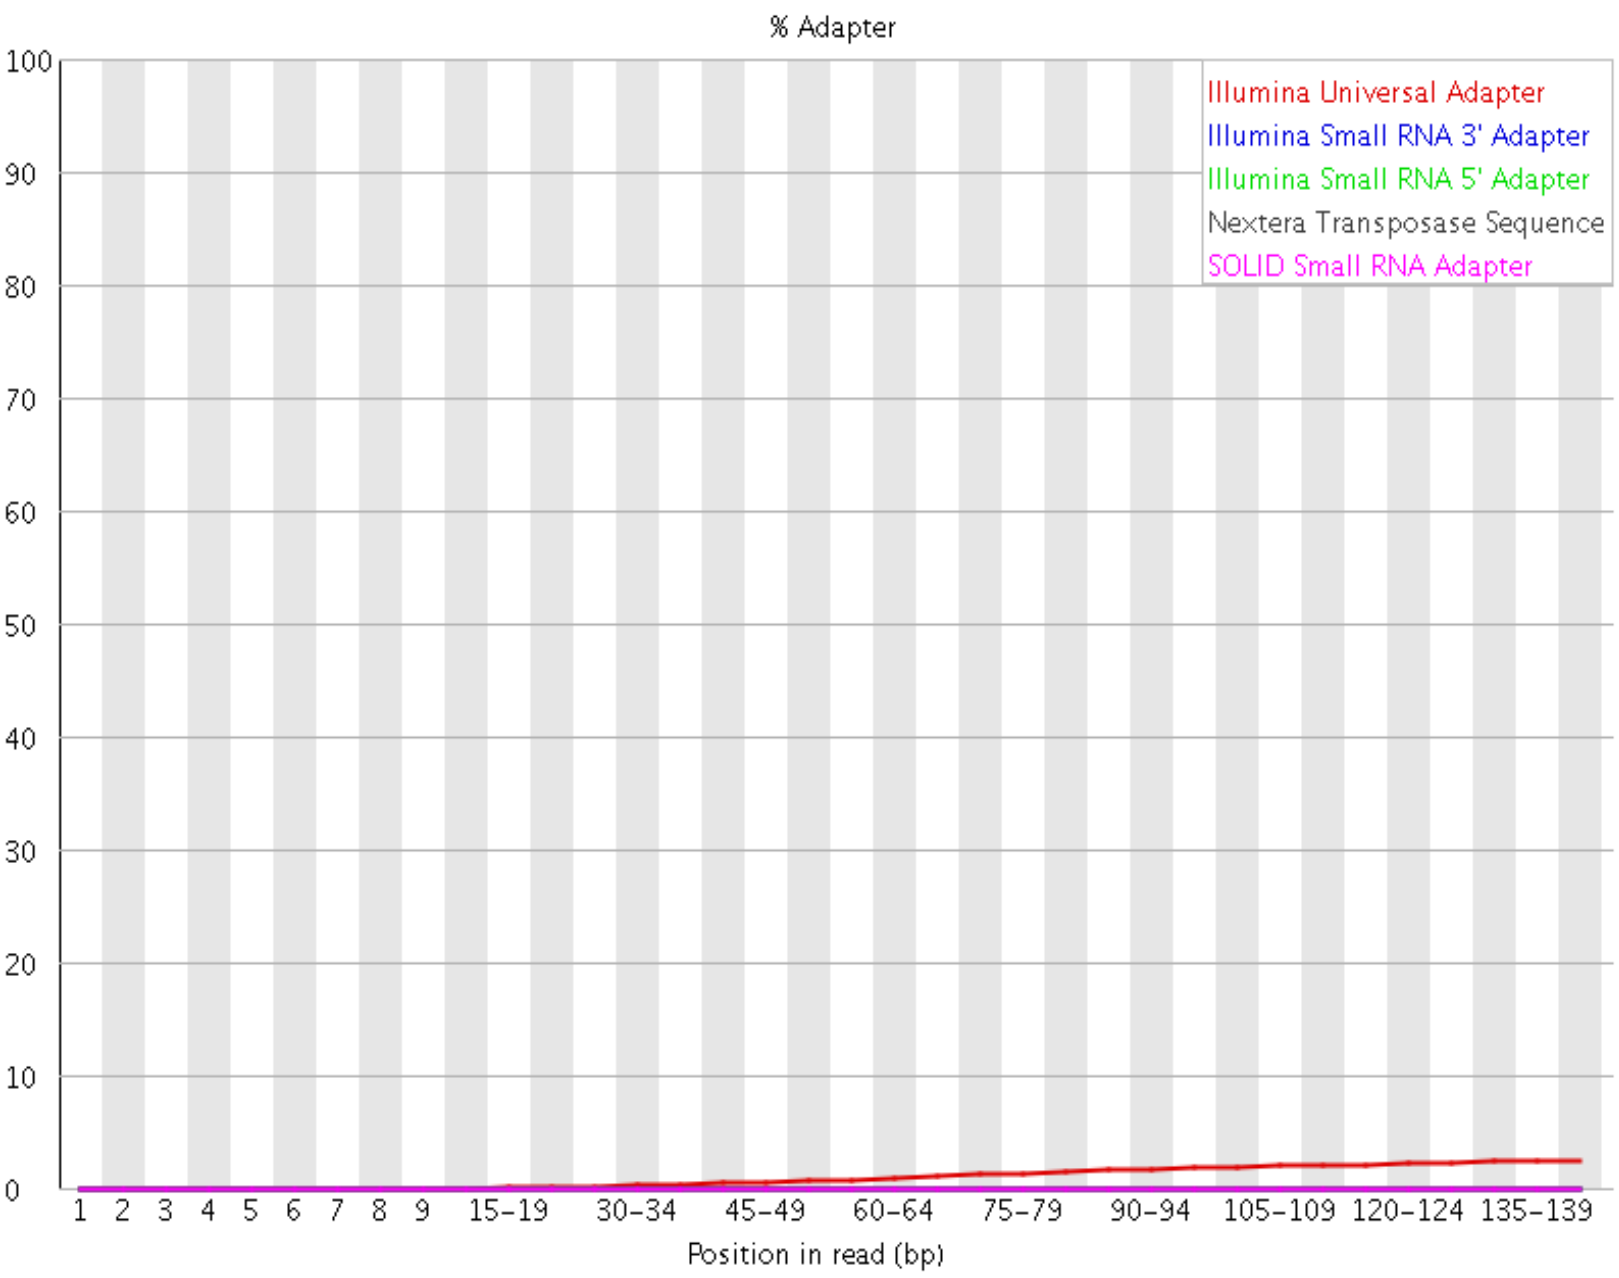

Supplement: Supplementary file [file 281709-6.pdf]
